# Supplementary material for: COVID-19 Genomic Surveillance in Bangui (Central African Republic) Reveals a Landscape of Circulating Variants Linked to Validated Antiviral Targets of SARS-CoV-2 Proteome
Source: MDPI journal article supplement (doi:10.3390/v15122309), 2023-11-24
Supplement: s1 [file s1]

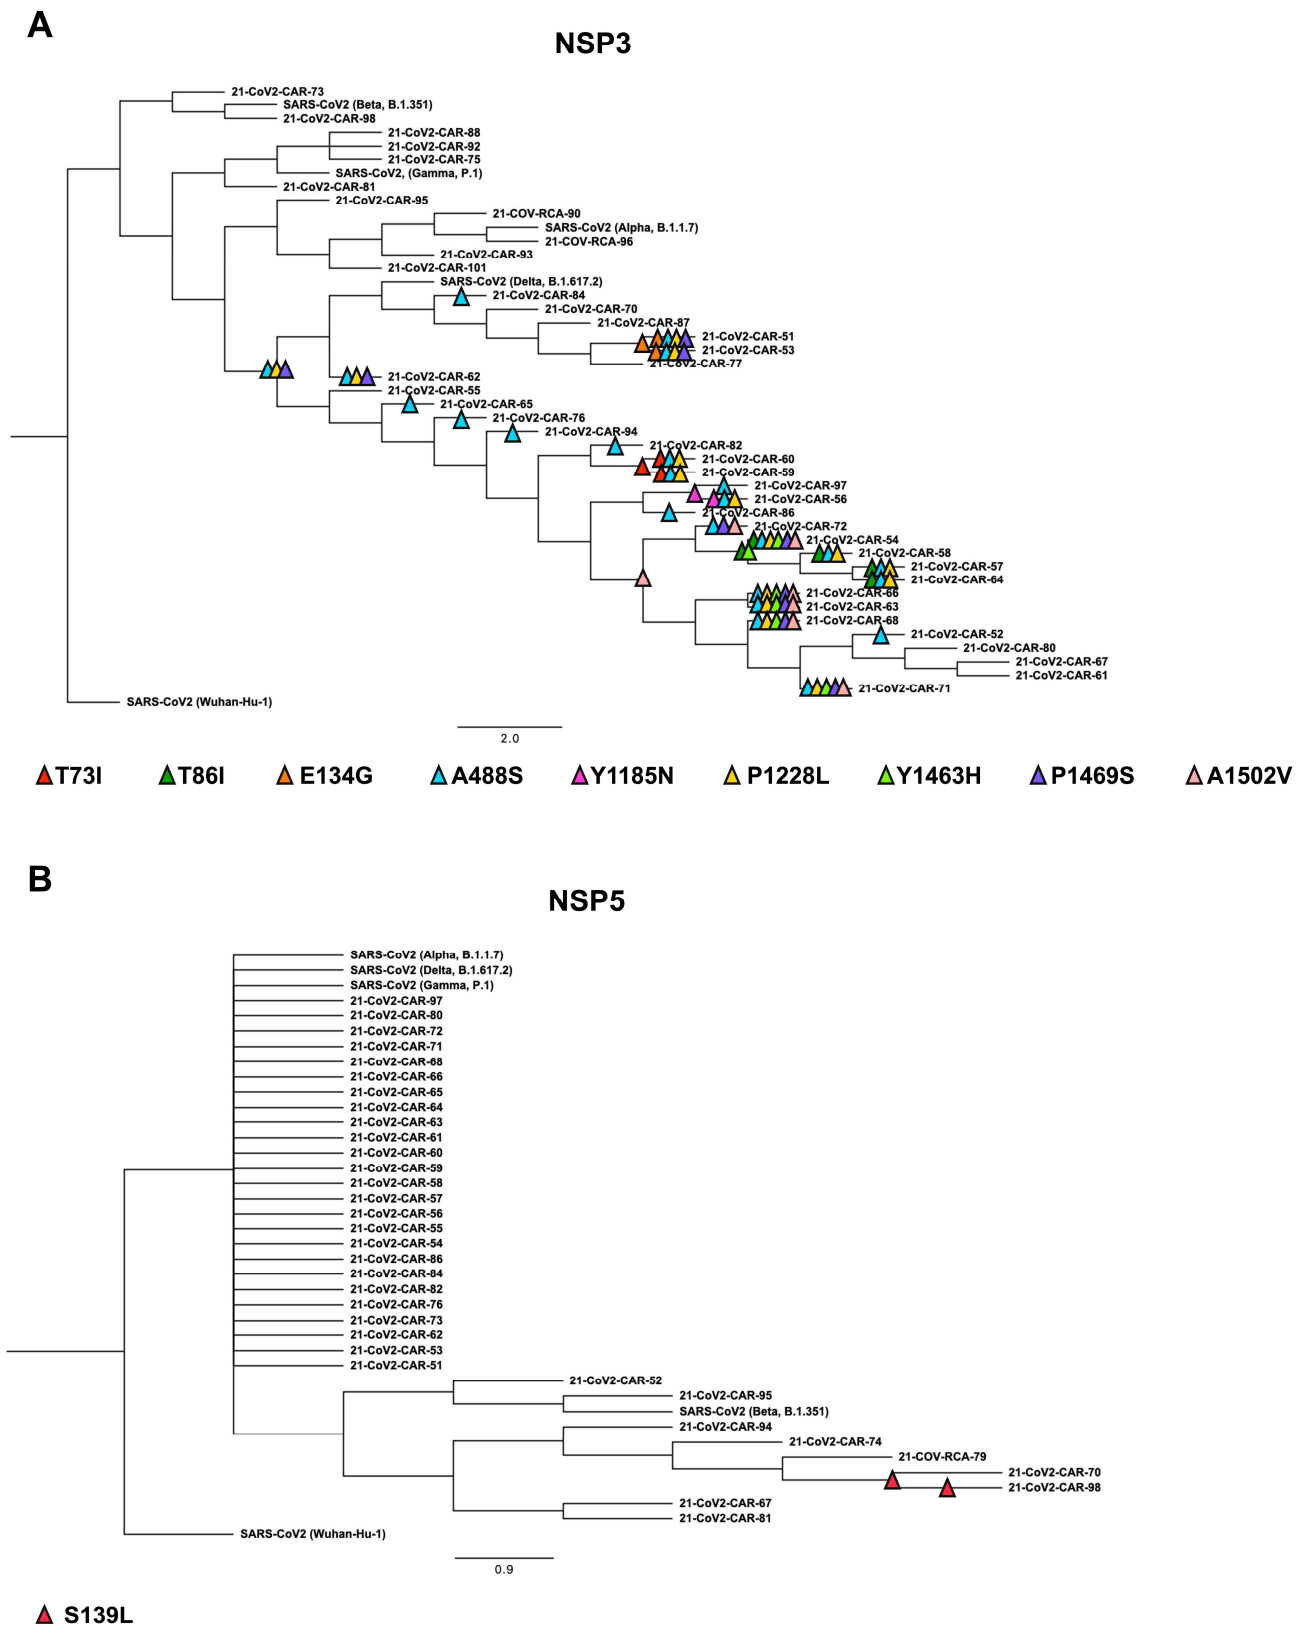

**Figure S2. NSP3 and NSP5 trees. A.** Phylogenetic trees of NSP3 with the legend reporting the mutations found in the dataset. Mutations are showed on the tree branches as coloured triangles. **B.** Phylogenetic trees of NSP5 with the legend reporting the single mutation found in the dataset. The mutation is showed on the tree branches as coloured triangles.

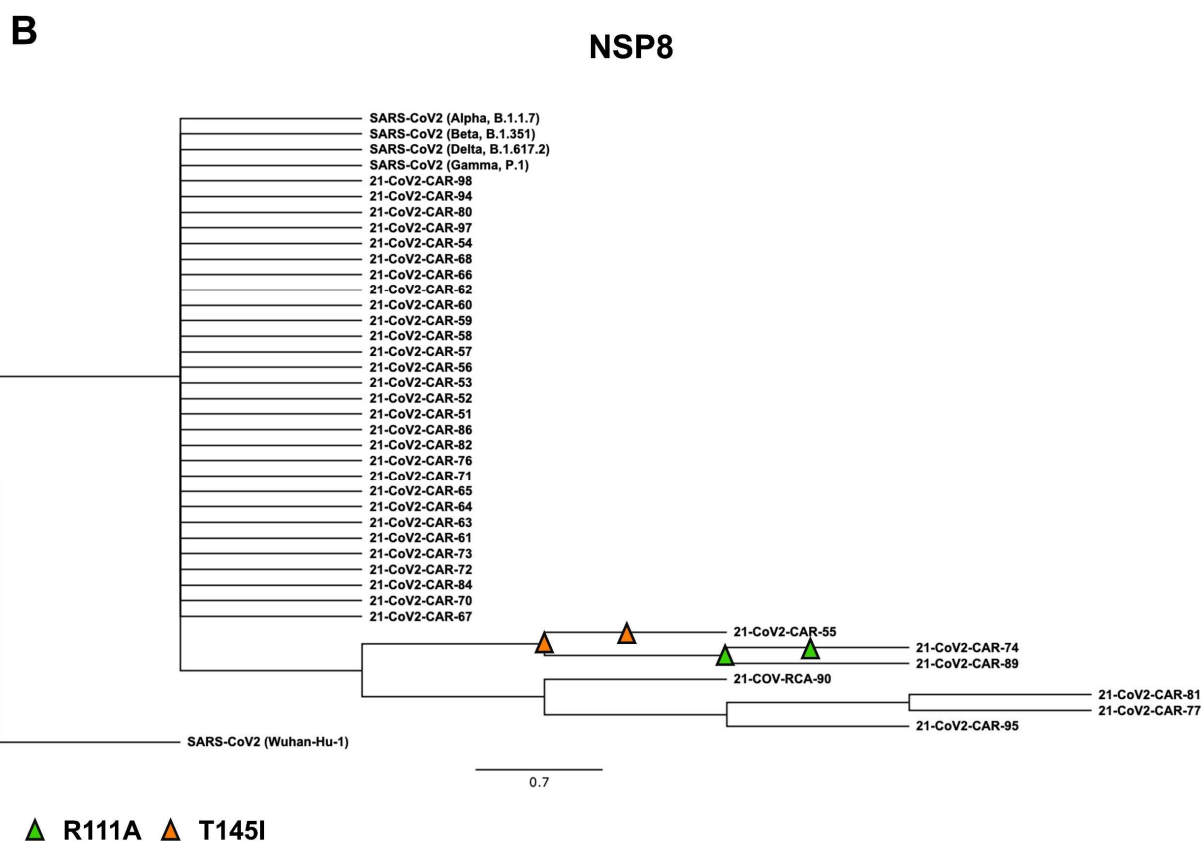

**Figure S3. NSP12 and NSP8 trees.** **A.** Phylogenetic trees of NSP12 with the legend reporting the mutations found in the dataset. Mutations are showed on the tree branches as coloured triangles. **B.** Phylogenetic trees of NSP8 with the legend reporting the mutations found in the dataset. Mutations are showed on the tree branches as coloured triangles.

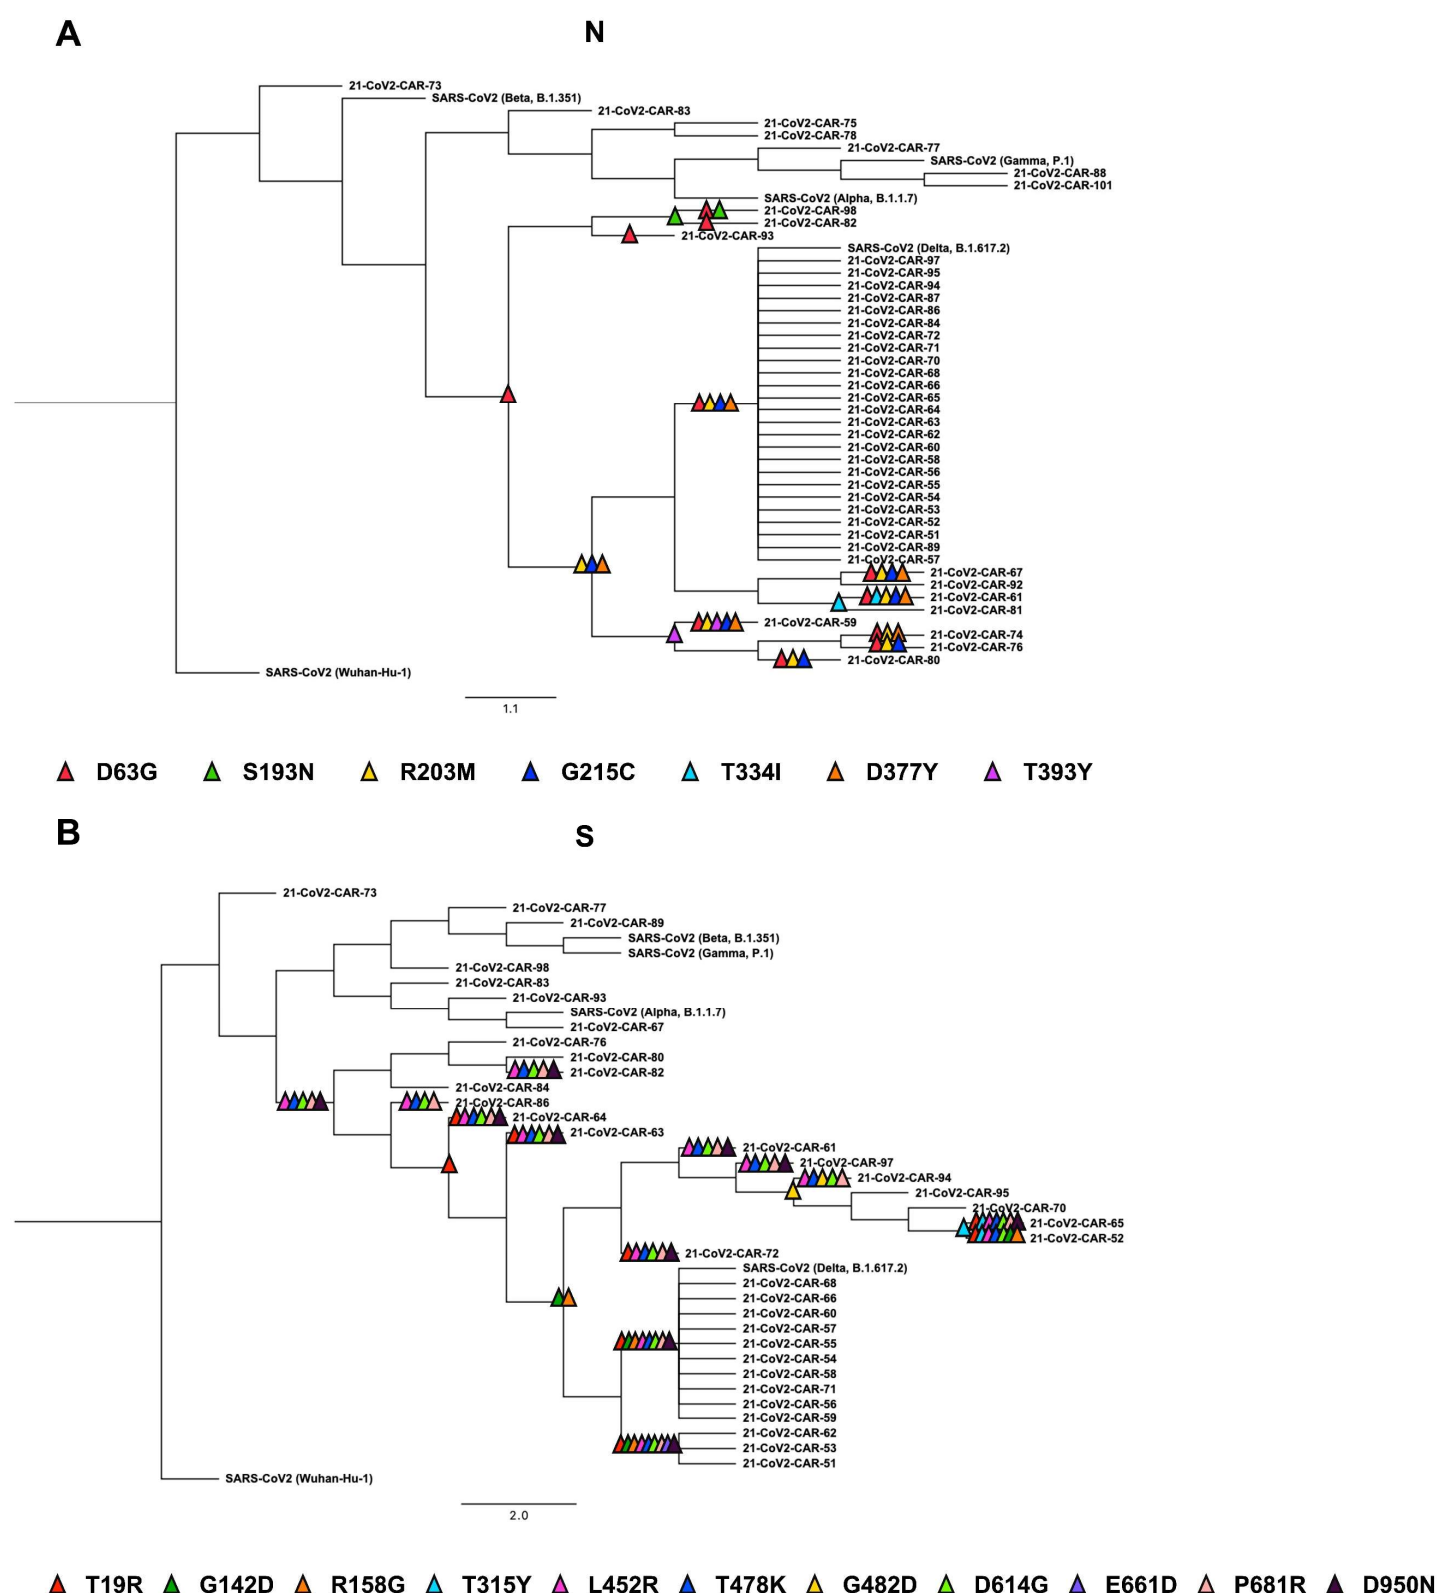

**Figure S4. N and S trees.** **A.** Phylogenetic trees of N with the legend reporting the mutations found in the dataset. Mutations are showed on the tree branches as coloured triangles. **B.** Phylogenetic trees of S with the legend reporting the mutations found in the dataset. Mutations are showed on the tree branches as coloured triangles.
