# Supplementary material for: COVID-19 Genomic Surveillance in Bangui (Central African Republic) Reveals a Landscape of Circulating Variants Linked to Validated Antiviral Targets of SARS-CoV-2 Proteome
Source: Viruses. 2023 Nov 24;15(12):2309. doi: 10.3390/v15122309 (PMC10748234; doi:10.3390/v15122309)
Supplement: Supplementary file 1 [file viruses-15-02309-s001.zip › viruses-2674484-supplementary.xlsx]

## Sheet: Foglio1
SARS-CoV-2 reference sequences for Wild Type strain and Variants of Concern (VoC)
Accession	classification	VoC
NC_45512	wild type	-
MN908947.3	wild type	-
MZ344997.1	VoC	alpha
MW598419.1	VoC	beta
MW642250.1	VoC	gamma
MZ009823.1	VoC	delta
OL672836.1	VoC	omicron BA.1
OM371884.1	VoC	omicron BA.2
OM958567.1	VoC	omicron BA.2.12.1
ON373214.1	VoC	omicron BA.4
ON249995.1	VoC	omicron BA.5
GISAID SARS-CoV-2 genome sequences from Central African Republic (sampling dates: November 1, 2020 - January 31, 2022; no low coverage)
Accession	clade	Nextclade_pango	partiallyAliased	clade_nextstrain	clade_who	clade_legacy
hCoV-19/Central_African_Republic/RCA-006/2022|EPI_ISL_10854816|2022-01-03	21K	BA.1.1	BA.1.1	21K	Omicron	21K (Omicron)
hCoV-19/Central_African_Republic/RCA-010/2022|EPI_ISL_10854820|2022-01-03	21K	BA.1.17.2	BA.1.17.2	21K	Omicron	21K (Omicron)
hCoV-19/Central_African_Republic/RCA-021/2022|EPI_ISL_10854829|2022-01-03	21K	BA.1.18	BA.1.18	21K	Omicron	21K (Omicron)
hCoV-19/Central_African_Republic/RCA-022/2022|EPI_ISL_10854830|2022-01-03	21J	AY.122	B.1.617.2.122	21J	Delta	21J (Delta)
hCoV-19/Central_African_Republic/RCA-023/2022|EPI_ISL_10854831|2022-01-03	21K	BA.1	BA.1	21K	Omicron	21K (Omicron)
hCoV-19/Central_African_Republic/RCA-024/2022|EPI_ISL_10854832|2022-01-03	20A	B.1.640.1	B.1.640.1	20A	unassigned	20A
hCoV-19/Central_African_Republic/RCA-025/2022|EPI_ISL_10854833|2022-01-03	20A	B.1.640.1	B.1.640.1	20A	unassigned	20A
hCoV-19/Central_African_Republic/RCA-026/2022|EPI_ISL_10854834|2022-01-03	20A	B.1.640.1	B.1.640.1	20A	unassigned	20A
hCoV-19/Central_African_Republic/RCA-043/2022|EPI_ISL_10854845|2022-01-03	21K	BA.1	BA.1	21K	Omicron	21K (Omicron)
hCoV-19/Central_African_Republic/RCA-063/2022|EPI_ISL_10854856|2022-01-03	20A	B.1.640.1	B.1.640.1	20A	unassigned	20A
hCoV-19/Central_African_Republic/LNBCSP042/2021|EPI_ISL_17418824|2021-12-14	20A	B.1.640.1	B.1.640.1	20A	unassigned	20A
hCoV-19/Central_African_Republic/LNBCSP043/2021|EPI_ISL_17418825|2021-12-14	20A	B.1.640.1	B.1.640.1	20A	unassigned	20A
hCoV-19/Central_African_Republic/LNBCSP044/2021|EPI_ISL_17418826|2021-02-12	20A	B.1.640.1	B.1.640.1	20A	unassigned	20A
hCoV-19/Central_African_Republic/LNBCSP045/2021|EPI_ISL_17418827|2021-02-15	20A	B.1.640.1	B.1.640.1	20A	unassigned	20A
hCoV-19/Central_African_Republic/LNBCSP046/2021|EPI_ISL_17418828|2021-02-15	20A	B.1.640.1	B.1.640.1	20A	unassigned	20A
hCoV-19/Central_African_Republic/LNBCSP048/2021|EPI_ISL_17418830|2021-02-16	20A	B.1.640.1	B.1.640.1	20A	unassigned	20A
hCoV-19/Central_African_Republic/LNBCSP049/2021|EPI_ISL_17418831|2021-02-17	20A	B.1.640.1	B.1.640.1	20A	unassigned	20A
hCoV-19/Central_African_Republic/LNBCSP050/2021|EPI_ISL_17418832|2021-02-17	20A	B.1.640.1	B.1.640.1	20A	unassigned	20A
hCoV-19/Central_African_Republic/LNBCSP051/2021|EPI_ISL_17418833|2021-02-18	20A	B.1.640.1	B.1.640.1	20A	unassigned	20A
hCoV-19/Central_African_Republic/LNBCSP052/2021|EPI_ISL_17418834|2021-02-18	20A	B.1.640.1	B.1.640.1	20A	unassigned	20A
hCoV-19/Central_African_Republic/LNBCSP053/2021|EPI_ISL_17418835|2021-02-18	20A	B.1.640.1	B.1.640.1	20A	unassigned	20A
hCoV-19/Central_African_Republic/LNBCSP054/2021|EPI_ISL_17418836|2021-02-18	20A	B.1.640.1	B.1.640.1	20A	unassigned	20A
hCoV-19/Central_African_Republic/LNBCSP055/2021|EPI_ISL_17418837|2021-02-18	20A	B.1.640.1	B.1.640.1	20A	unassigned	20A
hCoV-19/Central_African_Republic/LNBCSP056/2021|EPI_ISL_17418838|2021-02-18	20A	B.1.640.1	B.1.640.1	20A	unassigned	20A
hCoV-19/Central_African_Republic/LNBCSP057/2021|EPI_ISL_17418839|2021-02-18	20A	B.1.640.1	B.1.640.1	20A	unassigned	20A
hCoV-19/Central_African_Republic/LNBCSP059/2021|EPI_ISL_17418841|2021-03-11	20A	B.1.640.1	B.1.640.1	20A	unassigned	20A
hCoV-19/Central_African_Republic/LNBCSP060/2021|EPI_ISL_17418842|2021-12-30	20A	B.1.640.1	B.1.640.1	20A	unassigned	20A
hCoV-19/Central_African_Republic/LNBCSP061/2021|EPI_ISL_17418843|2021-12-30	20A	B.1.640.1	B.1.640.1	20A	unassigned	20A
hCoV-19/Central_African_Republic/LNBCSP062/2021|EPI_ISL_17418844|2021-12-30	20A	B.1.640.1	B.1.640.1	20A	unassigned	20A
hCoV-19/Central_African_Republic/LNBCSP063/2021|EPI_ISL_17418845|2021-12-30	21K	BA.1.1	BA.1.1	21K	Omicron	21K (Omicron)
hCoV-19/Central_African_Republic/LNBCSP064/2021|EPI_ISL_17418846|2021-12-30	21K	BA.1.1	BA.1.1	21K	Omicron	21K (Omicron)
hCoV-19/Central_African_Republic/LNBCSP065/2021|EPI_ISL_17418847|2021-12-14	20A	B.1.640.1	B.1.640.1	20A	unassigned	20A
hCoV-19/Central_African_Republic/LNBCSP066/2021|EPI_ISL_17418848|2021-12-14	20A	B.1.640.1	B.1.640.1	20A	unassigned	20A
hCoV-19/Central_African_Republic/LNBCSP067/2021|EPI_ISL_17418849|2021-12-14	20A	B.1.640.1	B.1.640.1	20A	unassigned	20A
hCoV-19/Central_African_Republic/LNBCSP068/2021|EPI_ISL_17418850|2021-06-09	20A	B.1.640.1	B.1.640.1	20A	unassigned	20A
hCoV-19/Central_African_Republic/LNBCSP069/2021|EPI_ISL_17418851|2021-12-15	20A	B.1.640.1	B.1.640.1	20A	unassigned	20A
hCoV-19/Central_African_Republic/LNBCSP070/2021|EPI_ISL_17418852|2021-12-15	20A	B.1.640.1	B.1.640.1	20A	unassigned	20A
hCoV-19/Central_African_Republic/LNBCSP071/2021|EPI_ISL_17418853|2021-12-15	20A	B.1.640.1	B.1.640.1	20A	unassigned	20A
hCoV-19/Central_African_Republic/LNBCSP072/2021|EPI_ISL_17418854|2021-12-15	20A	B.1.640.1	B.1.640.1	20A	unassigned	20A
hCoV-19/Central_African_Republic/LNBCSP073/2021|EPI_ISL_17418855|2021-12-15	20A	B.1.640.1	B.1.640.1	20A	unassigned	20A
hCoV-19/Central_African_Republic/LNBCSP075/2021|EPI_ISL_17418856|2021-12-15	20A	B.1.640.1	B.1.640.1	20A	unassigned	20A
hCoV-19/Central_African_Republic/LNBCSP076/2021|EPI_ISL_17418857|2021-12-15	20A	B.1.640.1	B.1.640.1	20A	unassigned	20A
hCoV-19/Central_African_Republic/LNBCSP078/2021|EPI_ISL_17418858|2021-12-30	21K	BA.1.1	BA.1.1	21K	Omicron	21K (Omicron)
hCoV-19/Central_African_Republic/LNBCSP080/2021|EPI_ISL_17418859|2021-12-30	21K	BA.1.1	BA.1.1	21K	Omicron	21K (Omicron)
hCoV-19/Central_African_Republic/LNBCSP081/2021|EPI_ISL_17418860|2021-12-30	21K	BA.1	BA.1	21K	Omicron	21K (Omicron)
hCoV-19/Central_African_Republic/LNBCSP083/2021|EPI_ISL_17418861|2021-12-30	21K	BA.1.1	BA.1.1	21K	Omicron	21K (Omicron)
hCoV-19/Central_African_Republic/LNBCSP085/2021|EPI_ISL_17418862|2021-12-30	20A	B.1.640.1	B.1.640.1	20A	unassigned	20A
hCoV-19/Central_African_Republic/LNBCSP086/2021|EPI_ISL_17418863|2021-12-30	20A	B.1.640.1	B.1.640.1	20A	unassigned	20A
hCoV-19/Central_African_Republic/LNBCSP084/2021|EPI_ISL_17423705|2021-12-30	21K	BA.1.1	BA.1.1	21K	Omicron	21K (Omicron)
hCoV-19/Central_African_Republic/LNBCSP001/2021|EPI_ISL_17423763|2021-11-25	21J	B.1.617.2	B.1.617.2	21J	Delta	21J (Delta)
hCoV-19/Central_African_Republic/LNBCSP007/2021|EPI_ISL_17423767|2021-12-20	21K	BA.1.1	BA.1.1	21K	Omicron	21K (Omicron)
hCoV-19/Central_African_Republic/LNBCSP010/2021|EPI_ISL_17423768|2021-11-30	21J	AY.122	B.1.617.2.122	21J	Delta	21J (Delta)
hCoV-19/Central_African_Republic/LNBCSP015/2021|EPI_ISL_17423770|2021-12-02	20A	B.1.640.1	B.1.640.1	20A	unassigned	20A
hCoV-19/Central_African_Republic/LNBCSP017/2021|EPI_ISL_17423772|2021-12-02	20A	B.1.640.1	B.1.640.1	20A	unassigned	20A
hCoV-19/Central_African_Republic/LNBCSP018/2021|EPI_ISL_17423773|2021-12-02	20A	B.1.640.1	B.1.640.1	20A	unassigned	20A
hCoV-19/Central_African_Republic/LNBCSP091/2021|EPI_ISL_17475265|2021-01-25	20A	B.1.640.1	B.1.640.1	20A	unassigned	20A
hCoV-19/Central_African_Republic/LNBCSP097/2021|EPI_ISL_17475267|2021-03-16	21K	BA.1	BA.1	21K	Omicron	21K (Omicron)
hCoV-19/Central_African_Republic/LNBCSP110/2021|EPI_ISL_17475272|2021-12-08	20A	B.1.640.1	B.1.640.1	20A	unassigned	20A
hCoV-19/Central_African_Republic/LNBCSP117/2021|EPI_ISL_17475274|2021-12-20	21K	BA.1.1	BA.1.1	21K	Omicron	21K (Omicron)
hCoV-19/Central_African_Republic/LNBCSP124/2021|EPI_ISL_17475276|2021-12-29	21K	BA.1	BA.1	21K	Omicron	21K (Omicron)
hCoV-19/Central_African_Republic/LNBCSP129/2021|EPI_ISL_17475278|2021-12-29	20A	B.1.640.1	B.1.640.1	20A	unassigned	20A
hCoV-19/Central_African_Republic/RCA-01/2021|EPI_ISL_1762052|2021	20A	B.1.620	B.1.620	20A	unassigned	20A
hCoV-19/Central_African_Republic/RCA-02/2021|EPI_ISL_1762053|2021	20A	B.1.620	B.1.620	20A	unassigned	20A
hCoV-19/Central_African_Republic/RCA-16/2021|EPI_ISL_1762064|2021	20A	B.1.620	B.1.620	20A	unassigned	20A
hCoV-19/Central_African_Republic/RCA-22/2021|EPI_ISL_1762068|2021	20A	B.1.620	B.1.620	20A	unassigned	20A
hCoV-19/Central_African_Republic/RCA-23/2021|EPI_ISL_1762069|2021	20A	B.1.620	B.1.620	20A	unassigned	20A
hCoV-19/Central_African_Republic/RCA-28/2021|EPI_ISL_1762072|2021	20A	B.1.620	B.1.620	20A	unassigned	20A
hCoV-19/Central_African_Republic/RCA-29/2021|EPI_ISL_1762073|2021	20A	B.1.620	B.1.620	20A	unassigned	20A
hCoV-19/Central_African_Republic/RCA-30/2021|EPI_ISL_1762074|2021	20A	B.1.620	B.1.620	20A	unassigned	20A
hCoV-19/Central_African_Republic/RCA-32/2021|EPI_ISL_1762075|2021	20A	B.1.620	B.1.620	20A	unassigned	20A
hCoV-19/Central_African_Republic/RCA-34/2021|EPI_ISL_1762076|2021	20A	B.1.620	B.1.620	20A	unassigned	20A
hCoV-19/Central_African_Republic/RCA-45/2021|EPI_ISL_1762087|2021	20A	B.1.620	B.1.620	20A	unassigned	20A
hCoV-19/Central_African_Republic/RCA-46/2021|EPI_ISL_1762088|2021	20A	B.1.620	B.1.620	20A	unassigned	20A
hCoV-19/Central_African_Republic/RCA-47/2021|EPI_ISL_1764144|2021	20A	B.1.620	B.1.620	20A	unassigned	20A
hCoV-19/Central_African_Republic/RCA-48/2021|EPI_ISL_1764145|2021	20A	B.1.620	B.1.620	20A	unassigned	20A
hCoV-19/Central_African_Republic/23648/2020|EPI_ISL_2281227|2020-11-11	20A	B.1.416	B.1.416	20A	unassigned	20A
hCoV-19/Central_African_Republic/23743/2020|EPI_ISL_2281228|2020-11-24	19B	A.21	A.21	19B	unassigned	19B
hCoV-19/Central_African_Republic/23749/2020|EPI_ISL_2281229|2020-11-24	20A	B.1.160	B.1.160	20A	unassigned	20A
hCoV-19/Central_African_Republic/23800/2020|EPI_ISL_2281230|2020-12-02	20B	B.1.1.359	B.1.1.359	20B	unassigned	20B
hCoV-19/Central_African_Republic/24014/2020|EPI_ISL_2281233|2020-12-15	19B	A.23.1	A.23.1	19B	unassigned	19B
hCoV-19/Central_African_Republic/24172/2021|EPI_ISL_2281237|2021-01-20	20I	B.1.1.7	B.1.1.7	20I	Alpha	20I (Alpha, V1)
hCoV-19/Central_African_Republic/24196/2021|EPI_ISL_2281238|2021-01-27	20I	B.1.1.7	B.1.1.7	20I	Alpha	20I (Alpha, V1)
hCoV-19/Central_African_Republic/24216/2021|EPI_ISL_2281239|2021-02-01	20A	B.1	B.1	20A	unassigned	20A
hCoV-19/Central_African_Republic/24219/2021|EPI_ISL_2281240|2021-02-02	20A	B.1.466.1	B.1.466.1	20A	unassigned	20A
hCoV-19/Central_African_Republic/24245/2021|EPI_ISL_2281242|2021-02-08	20A	B.1.466.1	B.1.466.1	20A	unassigned	20A
hCoV-19/Central_African_Republic/24253/2021|EPI_ISL_2281243|2021-02-11	20H	B.1.351	B.1.351	20H	Beta	20H (Beta, V2)
hCoV-19/Central_African_Republic/24256/2021|EPI_ISL_2281245|2021-02-12	21D	B.1.525	B.1.525	21D	Eta	21D (Eta)
hCoV-19/Central_African_Republic/24264/2021|EPI_ISL_2281246|2021-02-16	20I	B.1.1.7	B.1.1.7	20I	Alpha	20I (Alpha, V1)
hCoV-19/Central_African_Republic/24332/2021|EPI_ISL_2281247|2021-02-25	20A	B.1.619	B.1.619	20A	unassigned	20A
hCoV-19/Central_African_Republic/24343/2021|EPI_ISL_2281248|2021-02-26	20C	B.1	B.1	20C	unassigned	20C
hCoV-19/Central_African_Republic/24368/2021|EPI_ISL_2281249|2021-03-02	20A	B.1.619	B.1.619	20A	unassigned	20A
hCoV-19/Central_African_Republic/24371/2021|EPI_ISL_2281250|2021-03-03	20I	B.1.1.7	B.1.1.7	20I	Alpha	20I (Alpha, V1)
hCoV-19/Central_African_Republic/24377/2021|EPI_ISL_2281252|2021-03-04	20A	B.1.619	B.1.619	20A	unassigned	20A
hCoV-19/Central_African_Republic/24386/2021|EPI_ISL_2281253|2021-03-06	20A	B.1.619	B.1.619	20A	unassigned	20A
hCoV-19/Central_African_Republic/24387/2021|EPI_ISL_2281254|2021-03-06	20A	B.1.619	B.1.619	20A	unassigned	20A
hCoV-19/Central_African_Republic/24396/2021|EPI_ISL_2281256|2021-03-09	20I	B.1.1.7	B.1.1.7	20I	Alpha	20I (Alpha, V1)
hCoV-19/Central_African_Republic/24397/2021|EPI_ISL_2281257|2021-03-09	20I	B.1.1.7	B.1.1.7	20I	Alpha	20I (Alpha, V1)
hCoV-19/Central_African_Republic/24398/2021|EPI_ISL_2281258|2021-03-09	21D	B.1.525	B.1.525	21D	Eta	21D (Eta)
hCoV-19/Central_African_Republic/24407/2021|EPI_ISL_2281260|2021-03-10	20A	B.1.620	B.1.620	20A	unassigned	20A
hCoV-19/Central_African_Republic/24418/2021|EPI_ISL_2281261|2021-03-12	20A	B.1.619	B.1.619	20A	unassigned	20A
hCoV-19/Central_African_Republic/24432/2021|EPI_ISL_2281263|2021-03-13	20A	B.1.619	B.1.619	20A	unassigned	20A
hCoV-19/Central_African_Republic/24435/2021|EPI_ISL_2281264|2021-03-13	20I	B.1.1.7	B.1.1.7	20I	Alpha	20I (Alpha, V1)
hCoV-19/Central_African_Republic/24439/2021|EPI_ISL_2281265|2021-03-15	20I	B.1.1.7	B.1.1.7	20I	Alpha	20I (Alpha, V1)
hCoV-19/Central_African_Republic/24449/2021|EPI_ISL_2281267|2021-03-15	20A	B.1.620	B.1.620	20A	unassigned	20A
hCoV-19/Central_African_Republic/24451/2021|EPI_ISL_2281268|2021-03-15	20A	B.1.620	B.1.620	20A	unassigned	20A
hCoV-19/Central_African_Republic/24452/2021|EPI_ISL_2281269|2021-03-15	20A	B.1.620	B.1.620	20A	unassigned	20A
hCoV-19/Central_African_Republic/24458/2021|EPI_ISL_2281270|2021-03-17	20I	B.1.1.7	B.1.1.7	20I	Alpha	20I (Alpha, V1)
hCoV-19/Central_African_Republic/24473/2021|EPI_ISL_2281271|2021-03-16	20A	B.1.620	B.1.620	20A	unassigned	20A
hCoV-19/Central_African_Republic/24474/2021|EPI_ISL_2281272|2021-03-16	20A	B.1.620	B.1.620	20A	unassigned	20A
hCoV-19/Central_African_Republic/24492/2021|EPI_ISL_2281273|2021-03-17	20A	B.1.619	B.1.619	20A	unassigned	20A
hCoV-19/Central_African_Republic/24494/2021|EPI_ISL_2281274|2021-03-17	20I	B.1.1.7	B.1.1.7	20I	Alpha	20I (Alpha, V1)
hCoV-19/Central_African_Republic/24505/2021|EPI_ISL_2281276|2021-03-18	20A	B.1.620	B.1.620	20A	unassigned	20A
hCoV-19/Central_African_Republic/24507/2021|EPI_ISL_2281277|2021-03-18	20A	B.1.620	B.1.620	20A	unassigned	20A
hCoV-19/Central_African_Republic/24402/2021|EPI_ISL_2281278|2021	20A	B.1	B.1	20A	unassigned	20A
hCoV-19/Central_African_Republic/24404/2021|EPI_ISL_2281279|2021	20A	B.1	B.1	20A	unassigned	20A
hCoV-19/Central_African_Republic/24476/2021|EPI_ISL_2281280|2021-03-18	20A	B.1.620	B.1.620	20A	unassigned	20A
hCoV-19/Central_African_Republic/229/2021|EPI_ISL_2365408|2021-03-29	20A	B.1.620	B.1.620	20A	unassigned	20A
hCoV-19/Central_African_Republic/234/2021|EPI_ISL_2365409|2021-03-31	20A	B.1.620	B.1.620	20A	unassigned	20A
hCoV-19/Central_African_Republic/235/2021|EPI_ISL_2365410|2021-03-31	20A	B.1.620	B.1.620	20A	unassigned	20A
hCoV-19/Central_African_Republic/237/2021|EPI_ISL_2365411|2021-03-31	20A	B.1.620	B.1.620	20A	unassigned	20A
hCoV-19/Central_African_Republic/242/2021|EPI_ISL_2365412|2021-03-31	20A	B.1.620	B.1.620	20A	unassigned	20A
hCoV-19/Central_African_Republic/245/2021|EPI_ISL_2365413|2021-03-02	20A	B.1.620	B.1.620	20A	unassigned	20A
hCoV-19/Central_African_Republic/249/2021|EPI_ISL_2365414|2021-04-01	20A	B.1.620	B.1.620	20A	unassigned	20A
hCoV-19/Central_African_Republic/266/2021|EPI_ISL_2365415|2021-04-12	20A	B.1.620	B.1.620	20A	unassigned	20A
hCoV-19/Central_African_Republic/301/2021|EPI_ISL_2365416|2021-04-22	20A	B.1.620	B.1.620	20A	unassigned	20A
hCoV-19/Central_African_Republic/326/2021|EPI_ISL_2365417|2021-04-26	20A	B.1.620	B.1.620	20A	unassigned	20A
hCoV-19/Central_African_Republic/RCA-27/2021|EPI_ISL_2967034|2021	20A	B.1	B.1	20A	unassigned	20A
hCoV-19/Central_African_Republic/RCA-51/2021|EPI_ISL_3398824|2021	21J	AY.46.4	B.1.617.2.46.4	21J	Delta	21J (Delta)
hCoV-19/Central_African_Republic/RCA-53/2021|EPI_ISL_3398825|2021	21J	AY.46.4	B.1.617.2.46.4	21J	Delta	21J (Delta)
hCoV-19/Central_African_Republic/RCA-54/2021|EPI_ISL_3398826|2021	21J	AY.122	B.1.617.2.122	21J	Delta	21J (Delta)
hCoV-19/Central_African_Republic/RCA-55/2021|EPI_ISL_3398827|2021	21J	AY.122	B.1.617.2.122	21J	Delta	21J (Delta)
hCoV-19/Central_African_Republic/RCA-57/2021|EPI_ISL_3398829|2021	21J	AY.122	B.1.617.2.122	21J	Delta	21J (Delta)
hCoV-19/Central_African_Republic/RCA-60/2021|EPI_ISL_3398832|2021	21J	AY.122	B.1.617.2.122	21J	Delta	21J (Delta)
hCoV-19/Central_African_Republic/RCA-62/2021|EPI_ISL_3398833|2021	21J	AY.46.4	B.1.617.2.46.4	21J	Delta	21J (Delta)
hCoV-19/Central_African_Republic/RCA-66/2021|EPI_ISL_3398837|2021	21J	AY.122	B.1.617.2.122	21J	Delta	21J (Delta)
hCoV-19/Central_African_Republic/RCA-68/2021|EPI_ISL_3398838|2021	21J	AY.122	B.1.617.2.122	21J	Delta	21J (Delta)
hCoV-19/Central_African_Republic/RCA-71/2021|EPI_ISL_3398839|2021	21J	AY.122	B.1.617.2.122	21J	Delta	21J (Delta)
hCoV-19/Central_African_Republic/JXCDC-85/2021|EPI_ISL_8917340|2021-12-12	21J	AY.4	B.1.617.2.4	21J	Delta	21J (Delta)
GISAID SARS-CoV-2 genome sequences from Africa (sampling dates: July 2-22, 2021 - high coverage)
Accession	clade	Nextclade_pango	partiallyAliased	clade_nextstrain	clade_who	clade_legacy
hCoV-19/Reunion/CHU7210721336/2021|EPI_ISL_6779337|2021-07-09	20H	B.1.351.2	B.1.351.2	20H	Beta	20H (Beta, V2)
hCoV-19/Reunion/CHU7210705506/2021|EPI_ISL_6778902|2021-07-04	21A	AY.53	B.1.617.2.53	21A	Delta	21A (Delta)
hCoV-19/Reunion/CHU7210708114/2021|EPI_ISL_6778900|2021-07-05	21A	AY.53	B.1.617.2.53	21A	Delta	21A (Delta)
hCoV-19/Reunion/CHU7210705657/2021|EPI_ISL_6779357|2021-07-05	20H	B.1.351.2	B.1.351.2	20H	Beta	20H (Beta, V2)
hCoV-19/Reunion/CHU7210712792/2021|EPI_ISL_6779356|2021-07-07	20H	B.1.351.2	B.1.351.2	20H	Beta	20H (Beta, V2)
hCoV-19/Reunion/CHU7210712786/2021|EPI_ISL_6779353|2021-07-05	20H	B.1.351.2	B.1.351.2	20H	Beta	20H (Beta, V2)
hCoV-19/Reunion/CHU798000074309/2021|EPI_ISL_6779341|2021-07-10	20H	B.1.351.2	B.1.351.2	20H	Beta	20H (Beta, V2)
hCoV-19/Reunion/CHU7210711327/2021|EPI_ISL_6779348|2021-07-10	20H	B.1.351.2	B.1.351.2	20H	Beta	20H (Beta, V2)
hCoV-19/Reunion/CHU7210711409/2021|EPI_ISL_6779346|2021-07-11	20H	B.1.351.2	B.1.351.2	20H	Beta	20H (Beta, V2)
hCoV-19/Reunion/CHU798000073247/2021|EPI_ISL_6779363|2021-07-05	20H	B.1.351.2	B.1.351.2	20H	Beta	20H (Beta, V2)
hCoV-19/Reunion/CHU798000071663/2021|EPI_ISL_6779362|2021-07-02	20H	B.1.351.2	B.1.351.2	20H	Beta	20H (Beta, V2)
hCoV-19/Reunion/CHU7210708608/2021|EPI_ISL_6779367|2021-07-06	20H	B.1.351.2	B.1.351.2	20H	Beta	20H (Beta, V2)
hCoV-19/Reunion/CHU7210708617/2021|EPI_ISL_6779364|2021-07-06	20H	B.1.351.2	B.1.351.2	20H	Beta	20H (Beta, V2)
hCoV-19/Reunion/CHU7210721391/2021|EPI_ISL_6779302|2021-07-10	20H	B.1.351.2	B.1.351.2	20H	Beta	20H (Beta, V2)
hCoV-19/Reunion/CHU7210721381/2021|EPI_ISL_6779253|2021-07-10	20H	B.1.351.2	B.1.351.2	20H	Beta	20H (Beta, V2)
hCoV-19/Reunion/CHU7210721397/2021|EPI_ISL_6779271|2021-07-09	20H	B.1.351.2	B.1.351.2	20H	Beta	20H (Beta, V2)
hCoV-19/Reunion/CHU7210721399/2021|EPI_ISL_6779276|2021-07-09	20H	B.1.351.2	B.1.351.2	20H	Beta	20H (Beta, V2)
hCoV-19/Reunion/CHU7210721384/2021|EPI_ISL_6779263|2021-07-08	20H	B.1.351.2	B.1.351.2	20H	Beta	20H (Beta, V2)
hCoV-19/Reunion/CHU7210721368/2021|EPI_ISL_6779291|2021-07-08	20H	B.1.351.2	B.1.351.2	20H	Beta	20H (Beta, V2)
hCoV-19/Reunion/CHU7210721401/2021|EPI_ISL_6779283|2021-07-11	20H	B.1.351.2	B.1.351.2	20H	Beta	20H (Beta, V2)
hCoV-19/South_Africa/NHLS-UCT-GS-D370/2021|EPI_ISL_4817062|2021-07-06	21J	AY.45	B.1.617.2.45	21J	Delta	21J (Delta)
hCoV-19/South_Africa/NHLS-UCT-GS-D383/2021|EPI_ISL_4817063|2021-07-06	21I	AY.38	B.1.617.2.38	21I	Delta	21I (Delta)
hCoV-19/South_Africa/Tygerberg_1343/2021|EPI_ISL_3118753|2021-07-11	21I	AY.38	B.1.617.2.38	21I	Delta	21I (Delta)
hCoV-19/Reunion/HCL021128408801/2021|EPI_ISL_3130965|2021-07-06	20H	B.1.351	B.1.351	20H	Beta	20H (Beta, V2)
hCoV-19/Reunion/HCL021128419801/2021|EPI_ISL_3130969|2021-07-06	20H	B.1.351	B.1.351	20H	Beta	20H (Beta, V2)
hCoV-19/Reunion/HCL021128415901/2021|EPI_ISL_3130967|2021-07-06	20H	B.1.351.2	B.1.351.2	20H	Beta	20H (Beta, V2)
hCoV-19/Reunion/HCL021128412401/2021|EPI_ISL_3130966|2021-07-06	20H	B.1.351.2	B.1.351.2	20H	Beta	20H (Beta, V2)
hCoV-19/Reunion/HCL021128435401/2021|EPI_ISL_3130971|2021-07-06	20H	B.1.351.2	B.1.351.2	20H	Beta	20H (Beta, V2)
hCoV-19/Reunion/HCL021128460801/2021|EPI_ISL_3130974|2021-07-06	20H	B.1.351.2	B.1.351.2	20H	Beta	20H (Beta, V2)
hCoV-19/Reunion/HCL021128472301/2021|EPI_ISL_3130978|2021-07-06	20H	B.1.351	B.1.351	20H	Beta	20H (Beta, V2)
hCoV-19/Reunion/HCL021128471601/2021|EPI_ISL_3130977|2021-07-06	20H	B.1.351	B.1.351	20H	Beta	20H (Beta, V2)
hCoV-19/Reunion/HCL021128477501/2021|EPI_ISL_3130982|2021-07-06	20H	B.1.351	B.1.351	20H	Beta	20H (Beta, V2)
hCoV-19/Reunion/HCL021128476301/2021|EPI_ISL_3130981|2021-07-06	20H	B.1.351	B.1.351	20H	Beta	20H (Beta, V2)
hCoV-19/Reunion/HCL021128483201/2021|EPI_ISL_3130985|2021-07-06	20H	B.1.351.2	B.1.351.2	20H	Beta	20H (Beta, V2)
hCoV-19/Reunion/HCL021128482201/2021|EPI_ISL_3130984|2021-07-06	20H	B.1.351	B.1.351	20H	Beta	20H (Beta, V2)
hCoV-19/Reunion/HCL021128487301/2021|EPI_ISL_3130989|2021-07-06	20H	B.1.351.2	B.1.351.2	20H	Beta	20H (Beta, V2)
hCoV-19/Reunion/HCL021128489401/2021|EPI_ISL_3130990|2021-07-06	20H	B.1.351	B.1.351	20H	Beta	20H (Beta, V2)
hCoV-19/Reunion/HCL021128490001/2021|EPI_ISL_3130991|2021-07-06	20H	B.1.351	B.1.351	20H	Beta	20H (Beta, V2)
hCoV-19/South_Africa/NICD-N10903/2021|EPI_ISL_3131776|2021-07-06	21J	AY.45	B.1.617.2.45	21J	Delta	21J (Delta)
hCoV-19/Reunion/HCL021125589401/2021|EPI_ISL_3130369|2021-07-06	20H	B.1.351	B.1.351	20H	Beta	20H (Beta, V2)
hCoV-19/Gambia/48459/2021|EPI_ISL_3132311|2021-07-07	21I	B.1.617.2	B.1.617.2	21I	Delta	21I (Delta)
hCoV-19/South_Africa/KRISP-K019738/2021|EPI_ISL_3132634|2021-07-05	21J	AY.45	B.1.617.2.45	21J	Delta	21J (Delta)
hCoV-19/South_Africa/KRISP-K019733/2021|EPI_ISL_3132631|2021-07-02	20H	B.1.351	B.1.351	20H	Beta	20H (Beta, V2)
hCoV-19/South_Africa/KRISP-K019736/2021|EPI_ISL_3132632|2021-07-05	21J	B.1.617.2	B.1.617.2	21J	Delta	21J (Delta)
hCoV-19/South_Africa/KRISP-K019737/2021|EPI_ISL_3132633|2021-07-04	21J	AY.45	B.1.617.2.45	21J	Delta	21J (Delta)
hCoV-19/South_Africa/KRISP-K019722/2021|EPI_ISL_3132620|2021-07-02	21J	AY.45	B.1.617.2.45	21J	Delta	21J (Delta)
hCoV-19/South_Africa/NICD-N11206/2021|EPI_ISL_3149299|2021-07-04	20D	C.1.2	B.1.1.1.1.2	20D	unassigned	20D
hCoV-19/South_Africa/NICD-N11230/2021|EPI_ISL_3149301|2021-07-03	20D	C.1.2	B.1.1.1.1.2	20D	unassigned	20D
hCoV-19/South_Africa/NICD-N11223/2021|EPI_ISL_3149300|2021-07-04	20D	C.1.2	B.1.1.1.1.2	20D	unassigned	20D
hCoV-19/South_Africa/NICD-N11037/2021|EPI_ISL_3149313|2021-07-02	20D	C.1.2	B.1.1.1.1.2	20D	unassigned	20D
hCoV-19/Uganda/UG619/2021|EPI_ISL_3149360|2021-07-02	21J	AY.46	B.1.617.2.46	21J	Delta	21J (Delta)
hCoV-19/Reunion/PIMIT_14549/2021|EPI_ISL_3154248|2021-07-04	20H	B.1.351.2	B.1.351.2	20H	Beta	20H (Beta, V2)
hCoV-19/Reunion/PIMIT_15251/2021|EPI_ISL_3154262|2021-07-09	20H	B.1.351.2	B.1.351.2	20H	Beta	20H (Beta, V2)
hCoV-19/Reunion/PIMIT_15232/2021|EPI_ISL_3154261|2021-07-09	20H	B.1.351.2	B.1.351.2	20H	Beta	20H (Beta, V2)
hCoV-19/Reunion/PIMIT_15268/2021|EPI_ISL_3154263|2021-07-09	20H	B.1.351.2	B.1.351.2	20H	Beta	20H (Beta, V2)
hCoV-19/Reunion/PIMIT_15298/2021|EPI_ISL_3154265|2021-07-10	20H	B.1.351.2	B.1.351.2	20H	Beta	20H (Beta, V2)
hCoV-19/Reunion/PIMIT_14985/2021|EPI_ISL_3154256|2021-07-03	20H	B.1.351.2	B.1.351.2	20H	Beta	20H (Beta, V2)
hCoV-19/Reunion/PIMIT_15600/2021|EPI_ISL_3154270|2021-07-08	20H	B.1.351.2	B.1.351.2	20H	Beta	20H (Beta, V2)
hCoV-19/Reunion/PIMIT_15672/2021|EPI_ISL_3154273|2021-07-10	20H	B.1.351.2	B.1.351.2	20H	Beta	20H (Beta, V2)
hCoV-19/Reunion/PIMIT_15618/2021|EPI_ISL_3154272|2021-07-08	20H	B.1.351.2	B.1.351.2	20H	Beta	20H (Beta, V2)
hCoV-19/Reunion/PIMIT_15676/2021|EPI_ISL_3154274|2021-07-10	20H	B.1.351.2	B.1.351.2	20H	Beta	20H (Beta, V2)
hCoV-19/Reunion/PIMIT_15314/2021|EPI_ISL_3153968|2021-07-09	20H	B.1.351	B.1.351	20H	Beta	20H (Beta, V2)
hCoV-19/Reunion/PIMIT_15315/2021|EPI_ISL_3153969|2021-07-09	20H	B.1.351	B.1.351	20H	Beta	20H (Beta, V2)
hCoV-19/Reunion/PIMIT_15394/2021|EPI_ISL_3153971|2021-07-08	20H	B.1.351	B.1.351	20H	Beta	20H (Beta, V2)
hCoV-19/Reunion/PIMIT_15484/2021|EPI_ISL_3153972|2021-07-11	20H	B.1.351	B.1.351	20H	Beta	20H (Beta, V2)
hCoV-19/Reunion/PIMIT_15497/2021|EPI_ISL_3153975|2021-07-11	20H	B.1.351	B.1.351	20H	Beta	20H (Beta, V2)
hCoV-19/Reunion/PIMIT_15227/2021|EPI_ISL_3153962|2021-07-08	20H	B.1.351	B.1.351	20H	Beta	20H (Beta, V2)
hCoV-19/Reunion/PIMIT_15261/2021|EPI_ISL_3153964|2021-07-09	20H	B.1.351	B.1.351	20H	Beta	20H (Beta, V2)
hCoV-19/Reunion/PIMIT_15288/2021|EPI_ISL_3153966|2021-07-09	20H	B.1.351	B.1.351	20H	Beta	20H (Beta, V2)
hCoV-19/Reunion/PIMIT_15277/2021|EPI_ISL_3153965|2021-07-09	20H	B.1.351	B.1.351	20H	Beta	20H (Beta, V2)
hCoV-19/Reunion/PIMIT_15686/2021|EPI_ISL_3153990|2021-07-11	20H	B.1.351.2	B.1.351.2	20H	Beta	20H (Beta, V2)
hCoV-19/Reunion/PIMIT_15353/2021|EPI_ISL_3154363|2021-07-08	20H	B.1.351.2	B.1.351.2	20H	Beta	20H (Beta, V2)
hCoV-19/Reunion/PIMIT_15582/2021|EPI_ISL_3154365|2021-07-08	20H	B.1.351.2	B.1.351.2	20H	Beta	20H (Beta, V2)
hCoV-19/Reunion/PIMIT_15425/2021|EPI_ISL_3154364|2021-07-05	20H	B.1.351.2	B.1.351.2	20H	Beta	20H (Beta, V2)
hCoV-19/Reunion/PIMIT_15622/2021|EPI_ISL_3153818|2021-07-08	20H	B.1.351.2	B.1.351.2	20H	Beta	20H (Beta, V2)
hCoV-19/Reunion/PIMIT_14947/2021|EPI_ISL_3153861|2021-07-02	20H	B.1.351	B.1.351	20H	Beta	20H (Beta, V2)
hCoV-19/Reunion/PIMIT_15263/2021|EPI_ISL_3153862|2021-07-09	20H	B.1.351	B.1.351	20H	Beta	20H (Beta, V2)
hCoV-19/Reunion/PIMIT_15379/2021|EPI_ISL_3153865|2021-07-08	20H	B.1.351	B.1.351	20H	Beta	20H (Beta, V2)
hCoV-19/Reunion/PIMIT_15329/2021|EPI_ISL_3153864|2021-07-07	20H	B.1.351	B.1.351	20H	Beta	20H (Beta, V2)
hCoV-19/Reunion/PIMIT_15487/2021|EPI_ISL_3153866|2021-07-11	20H	B.1.351	B.1.351	20H	Beta	20H (Beta, V2)
hCoV-19/Sudan/N6392/2021|EPI_ISL_4739539|2021-07-03	19B	A.29	A.29	19B	unassigned	19B
hCoV-19/Reunion/PIMIT_15362/2021|EPI_ISL_3154017|2021-07-08	20H	B.1.351.2	B.1.351.2	20H	Beta	20H (Beta, V2)
hCoV-19/Reunion/PIMIT_15249/2021|EPI_ISL_3154016|2021-07-09	20H	B.1.351.2	B.1.351.2	20H	Beta	20H (Beta, V2)
hCoV-19/Reunion/PIMIT_15495/2021|EPI_ISL_3154019|2021-07-11	20H	B.1.351.2	B.1.351.2	20H	Beta	20H (Beta, V2)
hCoV-19/Reunion/PIMIT_15395/2021|EPI_ISL_3154018|2021-07-08	20H	B.1.351.2	B.1.351.2	20H	Beta	20H (Beta, V2)
hCoV-19/Reunion/PIMIT_14957/2021|EPI_ISL_3154033|2021-07-02	20H	B.1.351.2	B.1.351.2	20H	Beta	20H (Beta, V2)
hCoV-19/Reunion/PIMIT_15309/2021|EPI_ISL_3154081|2021-07-09	20H	B.1.351.2	B.1.351.2	20H	Beta	20H (Beta, V2)
hCoV-19/Reunion/PIMIT_15650/2021|EPI_ISL_3154084|2021-07-09	20H	B.1.351.2	B.1.351.2	20H	Beta	20H (Beta, V2)
hCoV-19/Reunion/PIMIT_15494/2021|EPI_ISL_3154083|2021-07-11	20H	B.1.351.2	B.1.351.2	20H	Beta	20H (Beta, V2)
hCoV-19/Reunion/PIMIT_15681/2021|EPI_ISL_3154085|2021-07-10	20H	B.1.351.2	B.1.351.2	20H	Beta	20H (Beta, V2)
hCoV-19/Reunion/PIMIT_14959/2021|EPI_ISL_3154075|2021-07-02	20H	B.1.351.2	B.1.351.2	20H	Beta	20H (Beta, V2)
hCoV-19/Reunion/PIMIT_14982/2021|EPI_ISL_3154077|2021-07-03	20H	B.1.351.2	B.1.351.2	20H	Beta	20H (Beta, V2)
hCoV-19/Reunion/PIMIT_15226/2021|EPI_ISL_3154079|2021-07-08	20H	B.1.351.2	B.1.351.2	20H	Beta	20H (Beta, V2)
hCoV-19/South_Africa/KRISP-K019779/2021|EPI_ISL_3161773|2021-07-02	21J	AY.45	B.1.617.2.45	21J	Delta	21J (Delta)
hCoV-19/South_Africa/NICD-R09981/2021|EPI_ISL_4891851|2021-07-05	21J	AY.45	B.1.617.2.45	21J	Delta	21J (Delta)
hCoV-19/South_Africa/NICD-R09983/2021|EPI_ISL_4891852|2021-07-06	21J	AY.45	B.1.617.2.45	21J	Delta	21J (Delta)
hCoV-19/South_Africa/NICD-R09890/2021|EPI_ISL_4891846|2021-07-05	21J	AY.32	B.1.617.2.32	21J	Delta	21J (Delta)
hCoV-19/South_Africa/NICD-R09896/2021|EPI_ISL_4891847|2021-07-02	21J	AY.32	B.1.617.2.32	21J	Delta	21J (Delta)
hCoV-19/South_Africa/NICD-R09937/2021|EPI_ISL_4891849|2021-07-05	21J	AY.45	B.1.617.2.45	21J	Delta	21J (Delta)
hCoV-19/South_Africa/NICD-R09815/2021|EPI_ISL_4891844|2021-07-02	21J	AY.45	B.1.617.2.45	21J	Delta	21J (Delta)
hCoV-19/South_Africa/NICD-R09894/2021|EPI_ISL_4891700|2021-07-02	21J	AY.91	B.1.617.2.91	21J	Delta	21J (Delta)
hCoV-19/South_Africa/NICD-N14959/2021|EPI_ISL_4891716|2021-07-03	21J	AY.45	B.1.617.2.45	21J	Delta	21J (Delta)
hCoV-19/Reunion/HCL021131204401/2021|EPI_ISL_3205497|2021-07-06	20H	B.1.351.2	B.1.351.2	20H	Beta	20H (Beta, V2)
hCoV-19/Reunion/HCL021131205101/2021|EPI_ISL_3205498|2021-07-06	20H	B.1.351	B.1.351	20H	Beta	20H (Beta, V2)
hCoV-19/Reunion/HCL021131206001/2021|EPI_ISL_3205499|2021-07-06	20H	B.1.351	B.1.351	20H	Beta	20H (Beta, V2)
hCoV-19/Reunion/HCL021130444101/2021|EPI_ISL_3205469|2021-07-06	20H	B.1.351.2	B.1.351.2	20H	Beta	20H (Beta, V2)
hCoV-19/Reunion/HCL021130469401/2021|EPI_ISL_3205478|2021-07-06	20H	B.1.351	B.1.351	20H	Beta	20H (Beta, V2)
hCoV-19/Reunion/HCL021130446501/2021|EPI_ISL_3205470|2021-07-06	20H	B.1.351	B.1.351	20H	Beta	20H (Beta, V2)
hCoV-19/Reunion/HCL021130452601/2021|EPI_ISL_3205471|2021-07-06	20H	B.1.351.2	B.1.351.2	20H	Beta	20H (Beta, V2)
hCoV-19/Reunion/HCL021130454401/2021|EPI_ISL_3205472|2021-07-06	20I	B.1.1.7	B.1.1.7	20I	Alpha	20I (Alpha, V1)
hCoV-19/Reunion/HCL021130459301/2021|EPI_ISL_3205474|2021-07-06	20H	B.1.351	B.1.351	20H	Beta	20H (Beta, V2)
hCoV-19/Reunion/HCL021130594401/2021|EPI_ISL_3205489|2021-07-06	20H	B.1.351	B.1.351	20H	Beta	20H (Beta, V2)
hCoV-19/Reunion/HCL021130476701/2021|EPI_ISL_3205483|2021-07-06	20H	B.1.351.2	B.1.351.2	20H	Beta	20H (Beta, V2)
hCoV-19/Reunion/HCL021130479301/2021|EPI_ISL_3205484|2021-07-06	20H	B.1.351.2	B.1.351.2	20H	Beta	20H (Beta, V2)
hCoV-19/Reunion/HCL021131206701/2021|EPI_ISL_3205500|2021-07-06	20H	B.1.351	B.1.351	20H	Beta	20H (Beta, V2)
hCoV-19/South_Africa/NHLS-UCT-GS-D036/2021|EPI_ISL_3207556|2021-07-06	21J	AY.45	B.1.617.2.45	21J	Delta	21J (Delta)
hCoV-19/South_Africa/NHLS-UCT-LA-Z541/2021|EPI_ISL_3207580|2021-07-05	21J	AY.32	B.1.617.2.32	21J	Delta	21J (Delta)
hCoV-19/South_Africa/NHLS-UCT-LA-Z543/2021|EPI_ISL_3207514|2021-07-05	20B	B.1.1.528	B.1.1.528	20B	unassigned	20B
hCoV-19/Morocco/FMP-348/2021|EPI_ISL_4945749|2021-07-10	21J	AY.33	B.1.617.2.33	21J	Delta	21J (Delta)
hCoV-19/Mauritius/266296/2021|EPI_ISL_3236190|2021-07-08	20B	AZ.5	B.1.1.318.5	20B	unassigned	20B
hCoV-19/Mauritius/261799/2021|EPI_ISL_3236189|2021-07-05	20B	AZ.5	B.1.1.318.5	20B	unassigned	20B
hCoV-19/Mauritius/259644/2021|EPI_ISL_3236188|2021-07-03	20B	AZ.5	B.1.1.318.5	20B	unassigned	20B
hCoV-19/South_Africa/NICD-N11881/2021|EPI_ISL_3236988|2021-07-08	21A	AY.19	B.1.617.2.19	21A	Delta	21A (Delta)
hCoV-19/South_Africa/NICD-N11589/2021|EPI_ISL_3236970|2021-07-06	21J	AY.45	B.1.617.2.45	21J	Delta	21J (Delta)
hCoV-19/South_Africa/NICD-N11578/2021|EPI_ISL_3236965|2021-07-05	21J	AY.45	B.1.617.2.45	21J	Delta	21J (Delta)
hCoV-19/South_Africa/NICD-N11140/2021|EPI_ISL_3237088|2021-07-04	21A	AY.19	B.1.617.2.19	21A	Delta	21A (Delta)
hCoV-19/South_Africa/NICD-N11139/2021|EPI_ISL_3237087|2021-07-04	21J	AY.45	B.1.617.2.45	21J	Delta	21J (Delta)
hCoV-19/South_Africa/NICD-N11120/2021|EPI_ISL_3237073|2021-07-03	21J	AY.45	B.1.617.2.45	21J	Delta	21J (Delta)
hCoV-19/South_Africa/NICD-N11114/2021|EPI_ISL_3237070|2021-07-04	21J	AY.45	B.1.617.2.45	21J	Delta	21J (Delta)
hCoV-19/South_Africa/NICD-N11121/2021|EPI_ISL_3237074|2021-07-05	21J	AY.45	B.1.617.2.45	21J	Delta	21J (Delta)
hCoV-19/South_Africa/NICD-N11152/2021|EPI_ISL_3237095|2021-07-03	21J	AY.45	B.1.617.2.45	21J	Delta	21J (Delta)
hCoV-19/South_Africa/NICD-N11148/2021|EPI_ISL_3237093|2021-07-05	21J	AY.45	B.1.617.2.45	21J	Delta	21J (Delta)
hCoV-19/South_Africa/NICD-N11153/2021|EPI_ISL_3237096|2021-07-04	21J	AY.45	B.1.617.2.45	21J	Delta	21J (Delta)
hCoV-19/South_Africa/NICD-N12159/2021|EPI_ISL_3237031|2021-07-07	21J	AY.45	B.1.617.2.45	21J	Delta	21J (Delta)
hCoV-19/South_Africa/NICD-N11111/2021|EPI_ISL_3237069|2021-07-04	21J	AY.45	B.1.617.2.45	21J	Delta	21J (Delta)
hCoV-19/South_Africa/NICD-N11110/2021|EPI_ISL_3237068|2021-07-03	21J	AY.99	B.1.617.2.99	21J	Delta	21J (Delta)
hCoV-19/South_Africa/NICD-N11107/2021|EPI_ISL_3237066|2021-07-04	21J	AY.45	B.1.617.2.45	21J	Delta	21J (Delta)
hCoV-19/South_Africa/NICD-N11104/2021|EPI_ISL_3237064|2021-07-04	21A	AY.19	B.1.617.2.19	21A	Delta	21A (Delta)
hCoV-19/South_Africa/NICD-N11096/2021|EPI_ISL_3237059|2021-07-04	21J	AY.45	B.1.617.2.45	21J	Delta	21J (Delta)
hCoV-19/South_Africa/NICD-N11094/2021|EPI_ISL_3237057|2021-07-03	21J	AY.45	B.1.617.2.45	21J	Delta	21J (Delta)
hCoV-19/South_Africa/NICD-N11086/2021|EPI_ISL_3237055|2021-07-04	21J	AY.45	B.1.617.2.45	21J	Delta	21J (Delta)
hCoV-19/South_Africa/NICD-N12084/2021|EPI_ISL_3237009|2021-07-03	21J	AY.120.2	B.1.617.2.120.2	21J	Delta	21J (Delta)
hCoV-19/South_Africa/NICD-N12074/2021|EPI_ISL_3237006|2021-07-04	21J	AY.120.2	B.1.617.2.120.2	21J	Delta	21J (Delta)
hCoV-19/South_Africa/NICD-N12144/2021|EPI_ISL_3237026|2021-07-06	21J	AY.45	B.1.617.2.45	21J	Delta	21J (Delta)
hCoV-19/South_Africa/NICD-N12140/2021|EPI_ISL_3237023|2021-07-06	21J	AY.45	B.1.617.2.45	21J	Delta	21J (Delta)
hCoV-19/South_Africa/NICD-N12146/2021|EPI_ISL_3237027|2021-07-09	21J	AY.45	B.1.617.2.45	21J	Delta	21J (Delta)
hCoV-19/South_Africa/NICD-N12137/2021|EPI_ISL_3237021|2021-07-06	21J	AY.45	B.1.617.2.45	21J	Delta	21J (Delta)
hCoV-19/South_Africa/NICD-N12130/2021|EPI_ISL_3237019|2021-07-05	21J	AY.120.2	B.1.617.2.120.2	21J	Delta	21J (Delta)
hCoV-19/South_Africa/NICD-N12128/2021|EPI_ISL_3237018|2021-07-05	21J	AY.45	B.1.617.2.45	21J	Delta	21J (Delta)
hCoV-19/South_Africa/NICD-N12127/2021|EPI_ISL_3237017|2021-07-05	21J	AY.91	B.1.617.2.91	21J	Delta	21J (Delta)
hCoV-19/South_Africa/NICD-N12261/2021|EPI_ISL_3237235|2021-07-10	21J	AY.45	B.1.617.2.45	21J	Delta	21J (Delta)
hCoV-19/South_Africa/NICD-N12088/2021|EPI_ISL_3237208|2021-07-03	21J	AY.120.2	B.1.617.2.120.2	21J	Delta	21J (Delta)
hCoV-19/South_Africa/NICD-N12079/2021|EPI_ISL_3237202|2021-07-02	21J	AY.45	B.1.617.2.45	21J	Delta	21J (Delta)
hCoV-19/South_Africa/NICD-N12085/2021|EPI_ISL_3237206|2021-07-03	21J	AY.120.2	B.1.617.2.120.2	21J	Delta	21J (Delta)
hCoV-19/South_Africa/NICD-N12082/2021|EPI_ISL_3237205|2021-07-02	21J	AY.45	B.1.617.2.45	21J	Delta	21J (Delta)
hCoV-19/South_Africa/NICD-N12081/2021|EPI_ISL_3237204|2021-07-02	21J	AY.45	B.1.617.2.45	21J	Delta	21J (Delta)
hCoV-19/South_Africa/NICD-N12150/2021|EPI_ISL_3237229|2021-07-06	21J	AY.45	B.1.617.2.45	21J	Delta	21J (Delta)
hCoV-19/South_Africa/NICD-N12135/2021|EPI_ISL_3237222|2021-07-06	21J	AY.45	B.1.617.2.45	21J	Delta	21J (Delta)
hCoV-19/South_Africa/NICD-N12134/2021|EPI_ISL_3237221|2021-07-08	21J	AY.120.2	B.1.617.2.120.2	21J	Delta	21J (Delta)
hCoV-19/South_Africa/NICD-N12149/2021|EPI_ISL_3237228|2021-07-06	21J	AY.45	B.1.617.2.45	21J	Delta	21J (Delta)
hCoV-19/South_Africa/NICD-N12132/2021|EPI_ISL_3237219|2021-07-08	21J	AY.120.2	B.1.617.2.120.2	21J	Delta	21J (Delta)
hCoV-19/South_Africa/NICD-N12129/2021|EPI_ISL_3237218|2021-07-05	21J	AY.120.2	B.1.617.2.120.2	21J	Delta	21J (Delta)
hCoV-19/South_Africa/NICD-N12071/2021|EPI_ISL_3237199|2021-07-04	21J	AY.120.2	B.1.617.2.120.2	21J	Delta	21J (Delta)
hCoV-19/South_Africa/NICD-N12070/2021|EPI_ISL_3237198|2021-07-04	21J	AY.120.2	B.1.617.2.120.2	21J	Delta	21J (Delta)
hCoV-19/South_Africa/NICD-N12069/2021|EPI_ISL_3237197|2021-07-04	21J	AY.45	B.1.617.2.45	21J	Delta	21J (Delta)
hCoV-19/South_Africa/NICD-N11951/2021|EPI_ISL_3237195|2021-07-10	21J	AY.45	B.1.617.2.45	21J	Delta	21J (Delta)
hCoV-19/South_Africa/NICD-N11904/2021|EPI_ISL_3237168|2021-07-11	21J	AY.99	B.1.617.2.99	21J	Delta	21J (Delta)
hCoV-19/South_Africa/NICD-N11883/2021|EPI_ISL_3237164|2021-07-08	21J	AY.45	B.1.617.2.45	21J	Delta	21J (Delta)
hCoV-19/South_Africa/NICD-N11882/2021|EPI_ISL_3237163|2021-07-08	21J	AY.45	B.1.617.2.45	21J	Delta	21J (Delta)
hCoV-19/South_Africa/NICD-N11869/2021|EPI_ISL_3237156|2021-07-08	21A	AY.19	B.1.617.2.19	21A	Delta	21A (Delta)
hCoV-19/South_Africa/NICD-N11867/2021|EPI_ISL_3237154|2021-07-08	21J	AY.45	B.1.617.2.45	21J	Delta	21J (Delta)
hCoV-19/South_Africa/NICD-N11864/2021|EPI_ISL_3237153|2021-07-08	21J	B.1.617.2	B.1.617.2	21J	Delta	21J (Delta)
hCoV-19/South_Africa/NICD-N11907/2021|EPI_ISL_3237170|2021-07-10	21J	AY.45	B.1.617.2.45	21J	Delta	21J (Delta)
hCoV-19/South_Africa/NICD-N11590/2021|EPI_ISL_3237128|2021-07-09	21J	AY.45	B.1.617.2.45	21J	Delta	21J (Delta)
hCoV-19/South_Africa/NICD-N11586/2021|EPI_ISL_3237126|2021-07-06	21J	AY.45	B.1.617.2.45	21J	Delta	21J (Delta)
hCoV-19/South_Africa/NICD-N11568/2021|EPI_ISL_3237119|2021-07-05	21J	AY.45	B.1.617.2.45	21J	Delta	21J (Delta)
hCoV-19/South_Africa/NICD-N11508/2021|EPI_ISL_3237111|2021-07-04	21J	AY.45	B.1.617.2.45	21J	Delta	21J (Delta)
hCoV-19/South_Africa/NICD-N11557/2021|EPI_ISL_3237116|2021-07-07	21J	AY.45	B.1.617.2.45	21J	Delta	21J (Delta)
hCoV-19/South_Africa/NICD-N11622/2021|EPI_ISL_3237145|2021-07-05	21J	AY.45	B.1.617.2.45	21J	Delta	21J (Delta)
hCoV-19/South_Africa/NICD-N11625/2021|EPI_ISL_3237148|2021-07-05	21J	AY.99	B.1.617.2.99	21J	Delta	21J (Delta)
hCoV-19/South_Africa/NICD-N11600/2021|EPI_ISL_3237133|2021-07-05	21J	AY.45	B.1.617.2.45	21J	Delta	21J (Delta)
hCoV-19/South_Africa/NICD-N11614/2021|EPI_ISL_3237139|2021-07-05	21J	AY.99	B.1.617.2.99	21J	Delta	21J (Delta)
hCoV-19/South_Africa/NICD-N11612/2021|EPI_ISL_3237138|2021-07-05	21J	AY.45	B.1.617.2.45	21J	Delta	21J (Delta)
hCoV-19/South_Africa/NICD-N11611/2021|EPI_ISL_3237137|2021-07-09	21J	AY.45	B.1.617.2.45	21J	Delta	21J (Delta)
hCoV-19/South_Africa/NICD-N11597/2021|EPI_ISL_3237131|2021-07-05	21J	AY.99	B.1.617.2.99	21J	Delta	21J (Delta)
hCoV-19/South_Africa/NICD-N11506/2021|EPI_ISL_3237109|2021-07-04	21A	AY.19	B.1.617.2.19	21A	Delta	21A (Delta)
hCoV-19/South_Africa/NICD-N11167/2021|EPI_ISL_3237103|2021-07-04	21J	AY.45	B.1.617.2.45	21J	Delta	21J (Delta)
hCoV-19/South_Africa/NICD-N11166/2021|EPI_ISL_3237102|2021-07-06	21J	AY.45	B.1.617.2.45	21J	Delta	21J (Delta)
hCoV-19/South_Africa/NICD-N11504/2021|EPI_ISL_3237107|2021-07-04	20H	B.1.351	B.1.351	20H	Beta	20H (Beta, V2)
hCoV-19/South_Africa/NICD-N11172/2021|EPI_ISL_3237105|2021-07-03	21J	AY.45	B.1.617.2.45	21J	Delta	21J (Delta)
hCoV-19/South_Africa/NICD-N11909/2021|EPI_ISL_3236992|2021-07-11	21I	B.1.617.2	B.1.617.2	21I	Delta	21I (Delta)
hCoV-19/South_Africa/NICD-N11903/2021|EPI_ISL_3236990|2021-07-11	21J	AY.45	B.1.617.2.45	21J	Delta	21J (Delta)
hCoV-19/South_Africa/NICD-N11865/2021|EPI_ISL_3236985|2021-07-08	21J	AY.45	B.1.617.2.45	21J	Delta	21J (Delta)
hCoV-19/South_Africa/NICD-N11161/2021|EPI_ISL_3236952|2021-07-03	21J	AY.45	B.1.617.2.45	21J	Delta	21J (Delta)
hCoV-19/South_Africa/NICD-N11157/2021|EPI_ISL_3236950|2021-07-03	21J	AY.45	B.1.617.2.45	21J	Delta	21J (Delta)
hCoV-19/South_Africa/NICD-N11147/2021|EPI_ISL_3236946|2021-07-06	21A	AY.19	B.1.617.2.19	21A	Delta	21A (Delta)
hCoV-19/South_Africa/NICD-N11131/2021|EPI_ISL_3236944|2021-07-04	21J	AY.45	B.1.617.2.45	21J	Delta	21J (Delta)
hCoV-19/South_Africa/NICD-N11150/2021|EPI_ISL_3236947|2021-07-04	21A	AY.19	B.1.617.2.19	21A	Delta	21A (Delta)
hCoV-19/South_Africa/NICD-N11113/2021|EPI_ISL_3236940|2021-07-04	21J	AY.45	B.1.617.2.45	21J	Delta	21J (Delta)
hCoV-19/South_Africa/NICD-N11594/2021|EPI_ISL_3236973|2021-07-05	21J	AY.45	B.1.617.2.45	21J	Delta	21J (Delta)
hCoV-19/South_Africa/NICD-N11582/2021|EPI_ISL_3236967|2021-07-05	21J	AY.99	B.1.617.2.99	21J	Delta	21J (Delta)
hCoV-19/South_Africa/NICD-N11588/2021|EPI_ISL_3236969|2021-07-05	21J	AY.99	B.1.617.2.99	21J	Delta	21J (Delta)
hCoV-19/South_Africa/NICD-N11576/2021|EPI_ISL_3236964|2021-07-05	21J	AY.45	B.1.617.2.45	21J	Delta	21J (Delta)
hCoV-19/South_Africa/NICD-N11575/2021|EPI_ISL_3236963|2021-07-05	21J	AY.45	B.1.617.2.45	21J	Delta	21J (Delta)
hCoV-19/South_Africa/NICD-N11112/2021|EPI_ISL_3236939|2021-07-03	21J	AY.45	B.1.617.2.45	21J	Delta	21J (Delta)
hCoV-19/South_Africa/NICD-N11109/2021|EPI_ISL_3236938|2021-07-04	21A	AY.19	B.1.617.2.19	21A	Delta	21A (Delta)
hCoV-19/South_Africa/KRISP-K020358/2021|EPI_ISL_3261956|2021-07-11	21J	AY.45	B.1.617.2.45	21J	Delta	21J (Delta)
hCoV-19/South_Africa/KRISP-K020341/2021|EPI_ISL_3261945|2021-07-08	21I	AY.38	B.1.617.2.38	21I	Delta	21I (Delta)
hCoV-19/South_Africa/KRISP-K020345/2021|EPI_ISL_3261948|2021-07-09	21I	AY.38	B.1.617.2.38	21I	Delta	21I (Delta)
hCoV-19/South_Africa/KRISP-K020332/2021|EPI_ISL_3261936|2021-07-05	21J	AY.45	B.1.617.2.45	21J	Delta	21J (Delta)
hCoV-19/South_Africa/KRISP-K020338/2021|EPI_ISL_3261942|2021-07-09	21J	AY.45	B.1.617.2.45	21J	Delta	21J (Delta)
hCoV-19/South_Africa/KRISP-K020316/2021|EPI_ISL_3261924|2021-07-03	21J	AY.120.2	B.1.617.2.120.2	21J	Delta	21J (Delta)
hCoV-19/South_Africa/KRISP-K020321/2021|EPI_ISL_3261929|2021-07-05	21I	AY.38	B.1.617.2.38	21I	Delta	21I (Delta)
hCoV-19/South_Africa/KRISP-K020323/2021|EPI_ISL_3261931|2021-07-05	21I	AY.38	B.1.617.2.38	21I	Delta	21I (Delta)
hCoV-19/South_Africa/KRISP-K020322/2021|EPI_ISL_3261930|2021-07-05	21I	AY.38	B.1.617.2.38	21I	Delta	21I (Delta)
hCoV-19/South_Africa/CERI-KRISP-K020120/2021|EPI_ISL_3267739|2021-07-02	21J	AY.120.2	B.1.617.2.120.2	21J	Delta	21J (Delta)
hCoV-19/South_Africa/NICD-N11134/2021|EPI_ISL_3237084|2021-07-04	20D	C.1.2	B.1.1.1.1.2	20D	unassigned	20D
hCoV-19/South_Africa/NICD-N12816/2021|EPI_ISL_3342266|2021-07-10	21A	B.1.617.2	B.1.617.2	21A	Delta	21A (Delta)
hCoV-19/South_Africa/NICD-N12817/2021|EPI_ISL_3342267|2021-07-10	21J	AY.45	B.1.617.2.45	21J	Delta	21J (Delta)
hCoV-19/South_Africa/NICD-N12807/2021|EPI_ISL_3342262|2021-07-10	21A	AY.19	B.1.617.2.19	21A	Delta	21A (Delta)
hCoV-19/South_Africa/NICD-N12785/2021|EPI_ISL_3342251|2021-07-09	21J	AY.45	B.1.617.2.45	21J	Delta	21J (Delta)
hCoV-19/Zimbabwe/CERI-KRISP-K021353/2021|EPI_ISL_3722305|2021-07-11	21J	AY.116	B.1.617.2.116	21J	Delta	21J (Delta)
hCoV-19/South_Africa/NICD-N12590/2021|EPI_ISL_3342208|2021-07-08	21J	AY.45	B.1.617.2.45	21J	Delta	21J (Delta)
hCoV-19/South_Africa/NICD-N12591/2021|EPI_ISL_3342209|2021-07-08	21J	AY.45	B.1.617.2.45	21J	Delta	21J (Delta)
hCoV-19/South_Africa/NICD-N12783/2021|EPI_ISL_3342249|2021-07-09	21J	AY.45	B.1.617.2.45	21J	Delta	21J (Delta)
hCoV-19/South_Africa/NICD-N12772/2021|EPI_ISL_3342242|2021-07-09	21A	AY.19	B.1.617.2.19	21A	Delta	21A (Delta)
hCoV-19/South_Africa/NICD-N12774/2021|EPI_ISL_3342243|2021-07-09	21J	AY.45	B.1.617.2.45	21J	Delta	21J (Delta)
hCoV-19/South_Africa/NICD-N12770/2021|EPI_ISL_3342240|2021-07-09	21J	AY.45	B.1.617.2.45	21J	Delta	21J (Delta)
hCoV-19/South_Africa/NICD-N12605/2021|EPI_ISL_3342221|2021-07-09	21J	AY.45	B.1.617.2.45	21J	Delta	21J (Delta)
hCoV-19/South_Africa/NICD-N12601/2021|EPI_ISL_3342218|2021-07-08	21J	AY.45	B.1.617.2.45	21J	Delta	21J (Delta)
hCoV-19/South_Africa/NICD-N12598/2021|EPI_ISL_3342215|2021-07-08	21J	AY.45	B.1.617.2.45	21J	Delta	21J (Delta)
hCoV-19/South_Africa/NICD-N12592/2021|EPI_ISL_3342210|2021-07-08	21J	AY.45	B.1.617.2.45	21J	Delta	21J (Delta)
hCoV-19/Morocco/FMP-321/2021|EPI_ISL_5096053|2021-07-10	21J	AY.33	B.1.617.2.33	21J	Delta	21J (Delta)
hCoV-19/South_Africa/NICD-N13135/2021|EPI_ISL_3411710|2021-07-09	21J	AY.45	B.1.617.2.45	21J	Delta	21J (Delta)
hCoV-19/South_Africa/NICD-N11546/2021|EPI_ISL_3411567|2021-07-02	21J	AY.45	B.1.617.2.45	21J	Delta	21J (Delta)
hCoV-19/South_Africa/NICD-N11889/2021|EPI_ISL_3411578|2021-07-09	21J	AY.45	B.1.617.2.45	21J	Delta	21J (Delta)
hCoV-19/South_Africa/NICD-N11890/2021|EPI_ISL_3411579|2021-07-08	21J	AY.45	B.1.617.2.45	21J	Delta	21J (Delta)
hCoV-19/South_Africa/NICD-N12245/2021|EPI_ISL_3411594|2021-07-02	21J	AY.45	B.1.617.2.45	21J	Delta	21J (Delta)
hCoV-19/South_Africa/NICD-N13122/2021|EPI_ISL_3411702|2021-07-09	21J	AY.45	B.1.617.2.45	21J	Delta	21J (Delta)
hCoV-19/South_Africa/NICD-N12257/2021|EPI_ISL_3411606|2021-07-05	21J	AY.45	B.1.617.2.45	21J	Delta	21J (Delta)
hCoV-19/South_Africa/NICD-N12787/2021|EPI_ISL_3411467|2021-07-10	20D	C.1.2	B.1.1.1.1.2	20D	unassigned	20D
hCoV-19/South_Africa/NICD-N13139/2021|EPI_ISL_3411713|2021-07-11	21I	B.1.617.2	B.1.617.2	21I	Delta	21I (Delta)
hCoV-19/South_Africa/NICD-N13136/2021|EPI_ISL_3411711|2021-07-07	21J	AY.45	B.1.617.2.45	21J	Delta	21J (Delta)
hCoV-19/South_Africa/NICD-N11547/2021|EPI_ISL_3411568|2021-07-02	21J	AY.45	B.1.617.2.45	21J	Delta	21J (Delta)
hCoV-19/South_Africa/NICD-N11886/2021|EPI_ISL_3411576|2021-07-05	21J	AY.45	B.1.617.2.45	21J	Delta	21J (Delta)
hCoV-19/South_Africa/NICD-N11892/2021|EPI_ISL_3411581|2021-07-05	21J	AY.45	B.1.617.2.45	21J	Delta	21J (Delta)
hCoV-19/South_Africa/NICD-N13131/2021|EPI_ISL_3411707|2021-07-07	21J	AY.45	B.1.617.2.45	21J	Delta	21J (Delta)
hCoV-19/South_Africa/NICD-N13015/2021|EPI_ISL_3411701|2021-07-10	21J	AY.45	B.1.617.2.45	21J	Delta	21J (Delta)
hCoV-19/South_Africa/NICD-N12254/2021|EPI_ISL_3411603|2021-07-04	21J	AY.45	B.1.617.2.45	21J	Delta	21J (Delta)
hCoV-19/South_Africa/NICD-N12746/2021|EPI_ISL_3411466|2021-07-10	21J	AY.45	B.1.617.2.45	21J	Delta	21J (Delta)
hCoV-19/South_Africa/KRISP-K020227/2021|EPI_ISL_3447713|2021-07-07	20D	C.1.2	B.1.1.1.1.2	20D	unassigned	20D
hCoV-19/South_Africa/KRISP-K020628/2021|EPI_ISL_3447711|2021-07-08	21J	AY.45	B.1.617.2.45	21J	Delta	21J (Delta)
hCoV-19/South_Africa/KRISP-K020619/2021|EPI_ISL_3447710|2021-07-07	21J	AY.45	B.1.617.2.45	21J	Delta	21J (Delta)
hCoV-19/South_Africa/NICD-N12000/2021|EPI_ISL_3451137|2021-07-09	21J	AY.45	B.1.617.2.45	21J	Delta	21J (Delta)
hCoV-19/South_Africa/NICD-N11999/2021|EPI_ISL_3451136|2021-07-11	21J	AY.95	B.1.617.2.95	21J	Delta	21J (Delta)
hCoV-19/South_Africa/NICD-N11996/2021|EPI_ISL_3451133|2021-07-10	21J	AY.45	B.1.617.2.45	21J	Delta	21J (Delta)
hCoV-19/South_Africa/KRISP-K020699/2021|EPI_ISL_3447869|2021-07-08	21A	AY.19	B.1.617.2.19	21A	Delta	21A (Delta)
hCoV-19/South_Africa/KRISP-K020740/2021|EPI_ISL_3447874|2021-07-11	21J	AY.45	B.1.617.2.45	21J	Delta	21J (Delta)
hCoV-19/South_Africa/KRISP-K020730/2021|EPI_ISL_3447871|2021-07-11	21A	AY.19	B.1.617.2.19	21A	Delta	21A (Delta)
hCoV-19/South_Africa/KRISP-K020744/2021|EPI_ISL_3447876|2021-07-11	21J	AY.45	B.1.617.2.45	21J	Delta	21J (Delta)
hCoV-19/South_Africa/KRISP-K020716/2021|EPI_ISL_3447870|2021-07-10	21I	AY.38	B.1.617.2.38	21I	Delta	21I (Delta)
hCoV-19/South_Africa/NICD-N13333/2021|EPI_ISL_3451413|2021-07-08	21J	AY.120.2	B.1.617.2.120.2	21J	Delta	21J (Delta)
hCoV-19/South_Africa/NICD-N12645/2021|EPI_ISL_3451219|2021-07-08	21J	AY.45	B.1.617.2.45	21J	Delta	21J (Delta)
hCoV-19/South_Africa/NICD-N12703/2021|EPI_ISL_3451263|2021-07-06	21J	AY.45	B.1.617.2.45	21J	Delta	21J (Delta)
hCoV-19/South_Africa/NICD-N12700/2021|EPI_ISL_3451260|2021-07-06	20H	B.1.351	B.1.351	20H	Beta	20H (Beta, V2)
hCoV-19/South_Africa/NICD-N12062/2021|EPI_ISL_3451178|2021-07-02	21J	AY.91	B.1.617.2.91	21J	Delta	21J (Delta)
hCoV-19/South_Africa/NICD-N13035/2021|EPI_ISL_3451349|2021-07-07	21I	B.1.617.2	B.1.617.2	21I	Delta	21I (Delta)
hCoV-19/South_Africa/NICD-N13021/2021|EPI_ISL_3451335|2021-07-08	20B	B.1.1.528	B.1.1.528	20B	unassigned	20B
hCoV-19/South_Africa/NICD-N13044/2021|EPI_ISL_3451356|2021-07-07	21J	AY.45	B.1.617.2.45	21J	Delta	21J (Delta)
hCoV-19/South_Africa/NICD-N13041/2021|EPI_ISL_3451353|2021-07-07	21J	AY.45	B.1.617.2.45	21J	Delta	21J (Delta)
hCoV-19/South_Africa/NICD-N12716/2021|EPI_ISL_3451276|2021-07-08	20B	B.1.1.528	B.1.1.528	20B	unassigned	20B
hCoV-19/South_Africa/NICD-N12710/2021|EPI_ISL_3451270|2021-07-08	20B	B.1.1.528	B.1.1.528	20B	unassigned	20B
hCoV-19/South_Africa/NICD-N12697/2021|EPI_ISL_3451257|2021-07-09	20B	B.1.1.528	B.1.1.528	20B	unassigned	20B
hCoV-19/South_Africa/NHLS-UCT-GS-D629/2021|EPI_ISL_3506471|2021-07-09	21J	AY.45	B.1.617.2.45	21J	Delta	21J (Delta)
hCoV-19/South_Africa/NHLS-UCT-GS-E150/2021|EPI_ISL_3506495|2021-07-09	21J	AY.99	B.1.617.2.99	21J	Delta	21J (Delta)
hCoV-19/South_Africa/NHLS-UCT-GS-D402/2021|EPI_ISL_3506492|2021-07-07	21J	AY.32	B.1.617.2.32	21J	Delta	21J (Delta)
hCoV-19/South_Africa/NHLS-UCT-GS-D648/2021|EPI_ISL_3506434|2021-07-10	20H	B.1.351	B.1.351	20H	Beta	20H (Beta, V2)
hCoV-19/South_Africa/NHLS-UCT-GS-D626/2021|EPI_ISL_3506505|2021-07-09	21J	AY.45	B.1.617.2.45	21J	Delta	21J (Delta)
hCoV-19/Botswana/R21B24_BHP_AAB77882/2021|EPI_ISL_2868398|2021-07-02	20H	B.1.351	B.1.351	20H	Beta	20H (Beta, V2)
hCoV-19/South_Africa/NICD-N11814/2021|EPI_ISL_3838369|2021-07-09	21J	AY.45	B.1.617.2.45	21J	Delta	21J (Delta)
hCoV-19/Uganda/UG680/2021|EPI_ISL_3546306|2021-07-10	21J	B.1.617.2	B.1.617.2	21J	Delta	21J (Delta)
hCoV-19/Uganda/UG675/2021|EPI_ISL_3546301|2021-07-10	21J	B.1.617.2	B.1.617.2	21J	Delta	21J (Delta)
hCoV-19/Uganda/UG681/2021|EPI_ISL_3546307|2021-07-11	21J	AY.46	B.1.617.2.46	21J	Delta	21J (Delta)
hCoV-19/Liberia/LIB-0085/2021|EPI_ISL_3547690|2021-07-09	21I	AY.37	B.1.617.2.37	21I	Delta	21I (Delta)
hCoV-19/Liberia/LIB-0094/2021|EPI_ISL_3547691|2021-07-10	21I	AY.37	B.1.617.2.37	21I	Delta	21I (Delta)
hCoV-19/Liberia/LIB-0073/2021|EPI_ISL_3547685|2021-07-08	21I	AY.37	B.1.617.2.37	21I	Delta	21I (Delta)
hCoV-19/Liberia/LIB-0074/2021|EPI_ISL_3547686|2021-07-08	21I	AY.37	B.1.617.2.37	21I	Delta	21I (Delta)
hCoV-19/Liberia/LIB-0076/2021|EPI_ISL_3547687|2021-07-08	21I	AY.37	B.1.617.2.37	21I	Delta	21I (Delta)
hCoV-19/Liberia/LIB-0078/2021|EPI_ISL_3547688|2021-07-08	21I	AY.37	B.1.617.2.37	21I	Delta	21I (Delta)
hCoV-19/South_Sudan/UG704/2021|EPI_ISL_3546341|2021-07-05	21A	AY.16	B.1.617.2.16	21A	Delta	21A (Delta)
hCoV-19/South_Sudan/UG693/2021|EPI_ISL_3546332|2021-07-11	21J	AY.46	B.1.617.2.46	21J	Delta	21J (Delta)
hCoV-19/Uganda/UG672/2021|EPI_ISL_3546298|2021-07-05	21J	AY.46	B.1.617.2.46	21J	Delta	21J (Delta)
hCoV-19/Uganda/UG670/2021|EPI_ISL_3546296|2021-07-05	21J	AY.46.5	B.1.617.2.46.5	21J	Delta	21J (Delta)
hCoV-19/Uganda/UG673/2021|EPI_ISL_3546299|2021-07-08	21J	AY.46	B.1.617.2.46	21J	Delta	21J (Delta)
hCoV-19/South_Africa/NICD-N11910/2021|EPI_ISL_3237172|2021-07-10	21J	AY.45	B.1.617.2.45	21J	Delta	21J (Delta)
hCoV-19/South_Africa/NICD-N13171/2021|EPI_ISL_3643984|2021-07-09	21I	B.1.617.2	B.1.617.2	21I	Delta	21I (Delta)
hCoV-19/South_Africa/NICD-N13151/2021|EPI_ISL_3643983|2021-07-06	21I	B.1.617.2	B.1.617.2	21I	Delta	21I (Delta)
hCoV-19/South_Africa/NICD-N13170/2021|EPI_ISL_3643943|2021-07-09	21J	AY.45	B.1.617.2.45	21J	Delta	21J (Delta)
hCoV-19/South_Africa/NICD-N13149/2021|EPI_ISL_3643942|2021-07-11	21J	AY.45	B.1.617.2.45	21J	Delta	21J (Delta)
hCoV-19/South_Africa/NICD-N13146/2021|EPI_ISL_3643941|2021-07-09	21J	AY.45	B.1.617.2.45	21J	Delta	21J (Delta)
hCoV-19/South_Africa/NICD-N13144/2021|EPI_ISL_3643992|2021-07-04	21J	AY.45	B.1.617.2.45	21J	Delta	21J (Delta)
hCoV-19/South_Africa/NICD-N13176/2021|EPI_ISL_3643995|2021-07-09	21J	AY.45	B.1.617.2.45	21J	Delta	21J (Delta)
hCoV-19/South_Africa/NICD-N13165/2021|EPI_ISL_3643994|2021-07-09	21J	AY.45	B.1.617.2.45	21J	Delta	21J (Delta)
hCoV-19/South_Africa/NICD-N13178/2021|EPI_ISL_3643965|2021-07-11	20D	C.1.2	B.1.1.1.1.2	20D	unassigned	20D
hCoV-19/South_Africa/NICD-N13197/2021|EPI_ISL_3643945|2021-07-11	21J	AY.45	B.1.617.2.45	21J	Delta	21J (Delta)
hCoV-19/South_Africa/NICD-N13177/2021|EPI_ISL_3643944|2021-07-06	21J	AY.45	B.1.617.2.45	21J	Delta	21J (Delta)
hCoV-19/South_Africa/KRISP-K021044/2021|EPI_ISL_3663500|2021-07-06	21J	AY.45	B.1.617.2.45	21J	Delta	21J (Delta)
hCoV-19/Malawi/CERI-KRISP-K021040/2021|EPI_ISL_3663497|2021-07-05	21I	B.1.617.2	B.1.617.2	21I	Delta	21I (Delta)
hCoV-19/Mozambique/CERI-KRISP-K021158/2021|EPI_ISL_3663568|2021-07-09	21I	AY.65	B.1.617.2.65	21I	Delta	21I (Delta)
hCoV-19/Mozambique/CERI-KRISP-K021122/2021|EPI_ISL_3663552|2021-07-02	21J	AY.122	B.1.617.2.122	21J	Delta	21J (Delta)
hCoV-19/Namibia/CERI-KRISP-K022538/2021|EPI_ISL_5327918|2021-07-09	21J	AY.91	B.1.617.2.91	21J	Delta	21J (Delta)
hCoV-19/Namibia/CERI-KRISP-K022540/2021|EPI_ISL_5327920|2021-07-09	21J	AY.91	B.1.617.2.91	21J	Delta	21J (Delta)
hCoV-19/Angola/CERI-KRISP-K021741/2021|EPI_ISL_3860017|2021-07-02	20I	B.1.1.7	B.1.1.7	20I	Alpha	20I (Alpha, V1)
hCoV-19/Namibia/CERI-KRISP-K022557/2021|EPI_ISL_5327937|2021-07-09	21J	AY.91	B.1.617.2.91	21J	Delta	21J (Delta)
hCoV-19/Namibia/CERI-KRISP-K022556/2021|EPI_ISL_5327936|2021-07-11	21J	AY.91	B.1.617.2.91	21J	Delta	21J (Delta)
hCoV-19/Namibia/CERI-KRISP-K022539/2021|EPI_ISL_5327919|2021-07-09	21J	AY.91	B.1.617.2.91	21J	Delta	21J (Delta)
hCoV-19/Namibia/CERI-KRISP-K022542/2021|EPI_ISL_5327922|2021-07-09	21J	AY.91	B.1.617.2.91	21J	Delta	21J (Delta)
hCoV-19/Namibia/CERI-KRISP-K022558/2021|EPI_ISL_5327940|2021-07-09	21J	AY.91	B.1.617.2.91	21J	Delta	21J (Delta)
hCoV-19/South_Africa/NICD-N12255/2021|EPI_ISL_3411604|2021-07-05	21J	AY.45	B.1.617.2.45	21J	Delta	21J (Delta)
hCoV-19/South_Africa/NICD-N12256/2021|EPI_ISL_3411605|2021-07-05	21J	AY.122	B.1.617.2.122	21J	Delta	21J (Delta)
hCoV-19/South_Africa/NICD-N14123/2021|EPI_ISL_3717982|2021-07-11	20D	C.1.2	B.1.1.1.1.2	20D	unassigned	20D
hCoV-19/South_Africa/NICD-N13010/2021|EPI_ISL_3411696|2021-07-10	21J	AY.45	B.1.617.2.45	21J	Delta	21J (Delta)
hCoV-19/South_Africa/NICD-N14150/2021|EPI_ISL_3718042|2021-07-10	21A	AY.19	B.1.617.2.19	21A	Delta	21A (Delta)
hCoV-19/South_Africa/NICD-N14151/2021|EPI_ISL_3718043|2021-07-09	21J	AY.45	B.1.617.2.45	21J	Delta	21J (Delta)
hCoV-19/South_Africa/NICD-N14122/2021|EPI_ISL_3718038|2021-07-09	21J	AY.45	B.1.617.2.45	21J	Delta	21J (Delta)
hCoV-19/South_Africa/NICD-N14171/2021|EPI_ISL_3718072|2021-07-11	20D	C.1.2	B.1.1.1.1.2	20D	unassigned	20D
hCoV-19/Mozambique/CERI-KRISP-K025926/2021|EPI_ISL_5425641|2021-07-05	21J	AY.6	B.1.617.2.6	21J	Delta	21J (Delta)
hCoV-19/Mozambique/CERI-KRISP-K025858/2021|EPI_ISL_5425649|2021-07-07	21J	AY.6	B.1.617.2.6	21J	Delta	21J (Delta)
hCoV-19/Mozambique/CERI-KRISP-K025844/2021|EPI_ISL_5425637|2021-07-07	21J	AY.6	B.1.617.2.6	21J	Delta	21J (Delta)
hCoV-19/South_Africa/NICD-N12251/2021|EPI_ISL_3411600|2021-07-04	21J	AY.45	B.1.617.2.45	21J	Delta	21J (Delta)
hCoV-19/Zimbabwe/CERI-KRISP-K021380/2021|EPI_ISL_3722322|2021-07-11	21J	AY.116	B.1.617.2.116	21J	Delta	21J (Delta)
hCoV-19/Zimbabwe/CERI-KRISP-K021364/2021|EPI_ISL_3722314|2021-07-11	21I	B.1.617.2	B.1.617.2	21I	Delta	21I (Delta)
hCoV-19/South_Africa/VIDA-KRISP-K020434/2021|EPI_ISL_3729072|2021-07-09	20D	C.1.2	B.1.1.1.1.2	20D	unassigned	20D
hCoV-19/Reunion/CHU7210708568/2021|EPI_ISL_6778898|2021-07-03	21A	AY.53	B.1.617.2.53	21A	Delta	21A (Delta)
hCoV-19/South_Africa/NICD-N12810/2021|EPI_ISL_5510280|2021-07-10	21A	AY.19	B.1.617.2.19	21A	Delta	21A (Delta)
hCoV-19/South_Africa/NICD-N12761/2021|EPI_ISL_5510340|2021-07-11	21J	B.1.617.2	B.1.617.2	21J	Delta	21J (Delta)
hCoV-19/South_Africa/NICD-N12806/2021|EPI_ISL_5510282|2021-07-09	21A	AY.19	B.1.617.2.19	21A	Delta	21A (Delta)
hCoV-19/South_Africa/VIDA-KRISP-K020436/2021|EPI_ISL_3729013|2021-07-09	21J	AY.45	B.1.617.2.45	21J	Delta	21J (Delta)
hCoV-19/South_Africa/VIDA-KRISP-K020435/2021|EPI_ISL_3729009|2021-07-09	21J	AY.45	B.1.617.2.45	21J	Delta	21J (Delta)
hCoV-19/South_Africa/VIDA-KRISP-K020431/2021|EPI_ISL_3729000|2021-07-08	21J	AY.45	B.1.617.2.45	21J	Delta	21J (Delta)
hCoV-19/South_Africa/VIDA-KRISP-K020432/2021|EPI_ISL_3729005|2021-07-09	21I	AY.38	B.1.617.2.38	21I	Delta	21I (Delta)
hCoV-19/South_Africa/VIDA-KRISP-K020410/2021|EPI_ISL_3729054|2021-07-06	21J	AY.45	B.1.617.2.45	21J	Delta	21J (Delta)
hCoV-19/South_Africa/KRISP-K020765/2021|EPI_ISL_3730370|2021-07-10	21J	AY.45	B.1.617.2.45	21J	Delta	21J (Delta)
hCoV-19/South_Africa/KRISP-K020768/2021|EPI_ISL_3730371|2021-07-11	21J	AY.45	B.1.617.2.45	21J	Delta	21J (Delta)
hCoV-19/South_Africa/VIDA-KRISP-K020414/2021|EPI_ISL_3728989|2021-07-07	21J	AY.45	B.1.617.2.45	21J	Delta	21J (Delta)
hCoV-19/South_Africa/VIDA-KRISP-K020409/2021|EPI_ISL_3728985|2021-07-06	21J	AY.45	B.1.617.2.45	21J	Delta	21J (Delta)
hCoV-19/South_Africa/KRISP-K020020/2021|EPI_ISL_3728977|2021-07-02	21J	AY.45	B.1.617.2.45	21J	Delta	21J (Delta)
hCoV-19/South_Africa/VIDA-KRISP-K020430/2021|EPI_ISL_3728996|2021-07-08	21J	AY.45	B.1.617.2.45	21J	Delta	21J (Delta)
hCoV-19/South_Africa/VIDA-KRISP-K020425/2021|EPI_ISL_3728993|2021-07-08	21J	AY.45	B.1.617.2.45	21J	Delta	21J (Delta)
hCoV-19/Zimbabwe/CERI-KRISP-K021556/2021|EPI_ISL_3730482|2021-07-05	21J	AY.116	B.1.617.2.116	21J	Delta	21J (Delta)
hCoV-19/South_Africa/NICD-N11634/2021|EPI_ISL_3838270|2021-07-05	21J	AY.45	B.1.617.2.45	21J	Delta	21J (Delta)
hCoV-19/South_Africa/NICD-N11638/2021|EPI_ISL_3838272|2021-07-05	21J	AY.45	B.1.617.2.45	21J	Delta	21J (Delta)
hCoV-19/South_Africa/NICD-N11640/2021|EPI_ISL_3838273|2021-07-07	21J	AY.45	B.1.617.2.45	21J	Delta	21J (Delta)
hCoV-19/South_Africa/NICD-N11816/2021|EPI_ISL_3838371|2021-07-09	21J	AY.45	B.1.617.2.45	21J	Delta	21J (Delta)
hCoV-19/South_Africa/NICD-N11808/2021|EPI_ISL_3838363|2021-07-10	21J	B.1.617.2	B.1.617.2	21J	Delta	21J (Delta)
hCoV-19/South_Africa/NICD-N11811/2021|EPI_ISL_3838366|2021-07-09	21J	AY.45	B.1.617.2.45	21J	Delta	21J (Delta)
hCoV-19/South_Africa/NICD-N11810/2021|EPI_ISL_3838365|2021-07-10	21J	AY.45	B.1.617.2.45	21J	Delta	21J (Delta)
hCoV-19/South_Africa/NICD-N11806/2021|EPI_ISL_3838361|2021-07-09	21J	AY.45	B.1.617.2.45	21J	Delta	21J (Delta)
hCoV-19/South_Africa/NICD-N11787/2021|EPI_ISL_3838342|2021-07-10	21J	AY.45	B.1.617.2.45	21J	Delta	21J (Delta)
hCoV-19/South_Africa/NICD-N11786/2021|EPI_ISL_3838341|2021-07-10	21J	AY.45	B.1.617.2.45	21J	Delta	21J (Delta)
hCoV-19/South_Africa/NICD-N11784/2021|EPI_ISL_3838339|2021-07-11	20H	B.1.351	B.1.351	20H	Beta	20H (Beta, V2)
hCoV-19/South_Africa/NICD-N11783/2021|EPI_ISL_3838338|2021-07-11	21J	AY.45	B.1.617.2.45	21J	Delta	21J (Delta)
hCoV-19/South_Africa/NICD-N11775/2021|EPI_ISL_3838331|2021-07-10	21J	AY.45	B.1.617.2.45	21J	Delta	21J (Delta)
hCoV-19/South_Africa/NICD-N11777/2021|EPI_ISL_3838333|2021-07-10	21J	AY.45	B.1.617.2.45	21J	Delta	21J (Delta)
hCoV-19/South_Africa/NICD-N11776/2021|EPI_ISL_3838332|2021-07-10	21J	AY.45	B.1.617.2.45	21J	Delta	21J (Delta)
hCoV-19/South_Africa/NICD-N11780/2021|EPI_ISL_3838335|2021-07-09	21J	AY.45	B.1.617.2.45	21J	Delta	21J (Delta)
hCoV-19/South_Africa/NICD-N11782/2021|EPI_ISL_3838337|2021-07-10	21J	AY.45	B.1.617.2.45	21J	Delta	21J (Delta)
hCoV-19/South_Africa/NICD-N11772/2021|EPI_ISL_3838328|2021-07-10	21J	AY.45	B.1.617.2.45	21J	Delta	21J (Delta)
hCoV-19/South_Africa/NICD-N11771/2021|EPI_ISL_3838327|2021-07-11	21J	AY.45	B.1.617.2.45	21J	Delta	21J (Delta)
hCoV-19/South_Africa/NICD-N11768/2021|EPI_ISL_3838324|2021-07-11	21J	AY.45	B.1.617.2.45	21J	Delta	21J (Delta)
hCoV-19/South_Africa/NICD-N11761/2021|EPI_ISL_3838317|2021-07-07	21J	AY.45	B.1.617.2.45	21J	Delta	21J (Delta)
hCoV-19/South_Africa/NICD-N11760/2021|EPI_ISL_3838316|2021-07-06	21J	AY.6	B.1.617.2.6	21J	Delta	21J (Delta)
hCoV-19/South_Africa/NICD-N11762/2021|EPI_ISL_3838318|2021-07-07	21J	AY.45	B.1.617.2.45	21J	Delta	21J (Delta)
hCoV-19/South_Africa/NICD-N11750/2021|EPI_ISL_3838311|2021-07-07	21J	AY.122	B.1.617.2.122	21J	Delta	21J (Delta)
hCoV-19/South_Africa/NICD-N11749/2021|EPI_ISL_3838310|2021-07-09	21J	AY.45	B.1.617.2.45	21J	Delta	21J (Delta)
hCoV-19/South_Africa/NICD-N11747/2021|EPI_ISL_3838308|2021-07-07	21J	AY.45	B.1.617.2.45	21J	Delta	21J (Delta)
hCoV-19/South_Africa/NICD-N11746/2021|EPI_ISL_3838307|2021-07-06	21J	AY.45	B.1.617.2.45	21J	Delta	21J (Delta)
hCoV-19/South_Africa/NICD-N11748/2021|EPI_ISL_3838309|2021-07-09	20H	B.1.351	B.1.351	20H	Beta	20H (Beta, V2)
hCoV-19/South_Africa/NICD-N12167/2021|EPI_ISL_3838394|2021-07-09	21J	AY.45	B.1.617.2.45	21J	Delta	21J (Delta)
hCoV-19/South_Africa/NICD-N12121/2021|EPI_ISL_3838389|2021-07-06	21J	AY.120.2	B.1.617.2.120.2	21J	Delta	21J (Delta)
hCoV-19/South_Africa/NICD-N12207/2021|EPI_ISL_3838426|2021-07-07	21J	AY.45	B.1.617.2.45	21J	Delta	21J (Delta)
hCoV-19/South_Africa/NICD-N12204/2021|EPI_ISL_3838424|2021-07-07	21J	AY.122	B.1.617.2.122	21J	Delta	21J (Delta)
hCoV-19/South_Africa/NICD-N12195/2021|EPI_ISL_3838417|2021-07-07	21J	AY.45	B.1.617.2.45	21J	Delta	21J (Delta)
hCoV-19/South_Africa/NICD-N12198/2021|EPI_ISL_3838419|2021-07-07	21J	AY.45	B.1.617.2.45	21J	Delta	21J (Delta)
hCoV-19/South_Africa/NICD-N12188/2021|EPI_ISL_3838412|2021-07-07	21J	AY.45	B.1.617.2.45	21J	Delta	21J (Delta)
hCoV-19/South_Africa/NICD-N12192/2021|EPI_ISL_3838414|2021-07-07	21J	AY.45	B.1.617.2.45	21J	Delta	21J (Delta)
hCoV-19/South_Africa/NICD-N12179/2021|EPI_ISL_3838404|2021-07-07	21J	AY.45	B.1.617.2.45	21J	Delta	21J (Delta)
hCoV-19/South_Africa/NICD-N12182/2021|EPI_ISL_3838407|2021-07-07	21J	AY.45	B.1.617.2.45	21J	Delta	21J (Delta)
hCoV-19/South_Africa/NICD-N12176/2021|EPI_ISL_3838401|2021-07-07	21J	AY.45	B.1.617.2.45	21J	Delta	21J (Delta)
hCoV-19/South_Africa/NICD-N11661/2021|EPI_ISL_3838279|2021-07-07	21J	AY.45	B.1.617.2.45	21J	Delta	21J (Delta)
hCoV-19/South_Africa/NICD-N11641/2021|EPI_ISL_3838274|2021-07-07	21J	AY.45	B.1.617.2.45	21J	Delta	21J (Delta)
hCoV-19/South_Africa/NICD-N11815/2021|EPI_ISL_3838370|2021-07-10	21J	AY.45	B.1.617.2.45	21J	Delta	21J (Delta)
hCoV-19/South_Africa/NICD-N11817/2021|EPI_ISL_3838372|2021-07-09	21J	AY.45	B.1.617.2.45	21J	Delta	21J (Delta)
hCoV-19/South_Africa/NICD-N11812/2021|EPI_ISL_3838367|2021-07-09	21J	AY.45	B.1.617.2.45	21J	Delta	21J (Delta)
hCoV-19/South_Africa/NICD-N11781/2021|EPI_ISL_3838336|2021-07-10	21J	AY.45	B.1.617.2.45	21J	Delta	21J (Delta)
hCoV-19/South_Africa/NICD-N11744/2021|EPI_ISL_3838305|2021-07-06	21J	AY.45	B.1.617.2.45	21J	Delta	21J (Delta)
hCoV-19/South_Africa/NICD-N11741/2021|EPI_ISL_3838302|2021-07-07	21J	AY.45	B.1.617.2.45	21J	Delta	21J (Delta)
hCoV-19/South_Africa/NICD-N12122/2021|EPI_ISL_3838390|2021-07-06	21J	AY.120.2	B.1.617.2.120.2	21J	Delta	21J (Delta)
hCoV-19/South_Africa/NICD-N12163/2021|EPI_ISL_3838392|2021-07-09	21J	AY.45	B.1.617.2.45	21J	Delta	21J (Delta)
hCoV-19/South_Africa/NICD-N12120/2021|EPI_ISL_3838388|2021-07-06	21J	AY.45	B.1.617.2.45	21J	Delta	21J (Delta)
hCoV-19/South_Africa/NICD-N12186/2021|EPI_ISL_3838410|2021-07-07	21J	AY.45	B.1.617.2.45	21J	Delta	21J (Delta)
hCoV-19/South_Africa/NICD-N12187/2021|EPI_ISL_3838411|2021-07-07	21J	AY.45	B.1.617.2.45	21J	Delta	21J (Delta)
hCoV-19/South_Africa/NICD-N12175/2021|EPI_ISL_3838400|2021-07-09	21I	B.1.617.2	B.1.617.2	21I	Delta	21I (Delta)
hCoV-19/South_Africa/NICD-N14508/2021|EPI_ISL_3838588|2021-07-10	21I	B.1.617.2	B.1.617.2	21I	Delta	21I (Delta)
hCoV-19/South_Africa/NICD-N14510/2021|EPI_ISL_3838589|2021-07-11	21J	AY.91	B.1.617.2.91	21J	Delta	21J (Delta)
hCoV-19/South_Africa/NICD-N14489/2021|EPI_ISL_3838574|2021-07-11	21J	AY.45	B.1.617.2.45	21J	Delta	21J (Delta)
hCoV-19/South_Africa/NICD-N14180/2021|EPI_ISL_3838657|2021-07-10	21J	AY.45	B.1.617.2.45	21J	Delta	21J (Delta)
hCoV-19/South_Africa/NICD-N14167/2021|EPI_ISL_3838647|2021-07-10	21J	AY.91	B.1.617.2.91	21J	Delta	21J (Delta)
hCoV-19/South_Africa/NICD-N14161/2021|EPI_ISL_3838642|2021-07-08	21J	AY.45	B.1.617.2.45	21J	Delta	21J (Delta)
hCoV-19/South_Africa/NICD-N14097/2021|EPI_ISL_3838635|2021-07-02	21J	AY.45	B.1.617.2.45	21J	Delta	21J (Delta)
hCoV-19/South_Africa/NICD-N14100/2021|EPI_ISL_3838638|2021-07-06	21J	AY.45	B.1.617.2.45	21J	Delta	21J (Delta)
hCoV-19/South_Africa/NICD-N14093/2021|EPI_ISL_3838632|2021-07-05	21J	AY.45	B.1.617.2.45	21J	Delta	21J (Delta)
hCoV-19/South_Africa/NICD-N14085/2021|EPI_ISL_3838626|2021-07-07	21A	AY.19	B.1.617.2.19	21A	Delta	21A (Delta)
hCoV-19/South_Africa/NICD-N14070/2021|EPI_ISL_3838611|2021-07-06	21J	AY.45	B.1.617.2.45	21J	Delta	21J (Delta)
hCoV-19/South_Africa/NICD-N14061/2021|EPI_ISL_3838603|2021-07-06	21J	AY.45	B.1.617.2.45	21J	Delta	21J (Delta)
hCoV-19/South_Africa/NICD-N14067/2021|EPI_ISL_3838608|2021-07-07	21A	AY.19	B.1.617.2.19	21A	Delta	21A (Delta)
hCoV-19/Nigeria/S12-93458/2021|EPI_ISL_3857334|2021-07-08	21J	AY.36	B.1.617.2.36	21J	Delta	21J (Delta)
hCoV-19/South_Africa/KRISP-K021978/2021|EPI_ISL_3860148|2021-07-06	21J	AY.45	B.1.617.2.45	21J	Delta	21J (Delta)
hCoV-19/South_Africa/KRISP-K021985/2021|EPI_ISL_3860152|2021-07-05	21J	AY.45	B.1.617.2.45	21J	Delta	21J (Delta)
hCoV-19/South_Africa/KRISP-K021979/2021|EPI_ISL_3860150|2021-07-05	21J	AY.45	B.1.617.2.45	21J	Delta	21J (Delta)
hCoV-19/Togo/NMIMR-21-TGS-363/2021|EPI_ISL_3915065|2021-07-06	21J	B.1.617.2	B.1.617.2	21J	Delta	21J (Delta)
hCoV-19/Togo/NMIMR-21-TGS-364/2021|EPI_ISL_3915066|2021-07-07	21J	AY.122	B.1.617.2.122	21J	Delta	21J (Delta)
hCoV-19/Botswana/R21B82_BHP_AAB78333/2021|EPI_ISL_2868411|2021-07-02	20H	B.1.351	B.1.351	20H	Beta	20H (Beta, V2)
hCoV-19/Nigeria/CV1968/2021|EPI_ISL_3945351|2021-07-02	21J	AY.36	B.1.617.2.36	21J	Delta	21J (Delta)
hCoV-19/Nigeria/CV1970/2021|EPI_ISL_3945352|2021-07-08	21J	AY.36	B.1.617.2.36	21J	Delta	21J (Delta)
hCoV-19/South_Africa/NHLS-UCT-GS-D506/2021|EPI_ISL_3957813|2021-07-09	21J	AY.32	B.1.617.2.32	21J	Delta	21J (Delta)
hCoV-19/Reunion/CHU798000074663/2021|EPI_ISL_6779342|2021-07-10	20H	B.1.351.2	B.1.351.2	20H	Beta	20H (Beta, V2)
hCoV-19/Reunion/CHU7210712783/2021|EPI_ISL_6779354|2021-07-07	20H	B.1.351.2	B.1.351.2	20H	Beta	20H (Beta, V2)
hCoV-19/Reunion/CHU7210708200/2021|EPI_ISL_6779358|2021-07-08	20H	B.1.351.2	B.1.351.2	20H	Beta	20H (Beta, V2)
hCoV-19/Reunion/CHU798000074281/2021|EPI_ISL_6779361|2021-07-07	20H	B.1.351.2	B.1.351.2	20H	Beta	20H (Beta, V2)
hCoV-19/Ghana/UHAS-HOV-1702/2021|EPI_ISL_3980505|2021-07-05	21J	AY.88	B.1.617.2.88	21J	Delta	21J (Delta)
hCoV-19/Ghana/UHAS-HOV-1714/2021|EPI_ISL_3980506|2021-07-05	21J	B.1.617.2	B.1.617.2	21J	Delta	21J (Delta)
hCoV-19/South_Africa/KRISP-UFS-K022066/2021|EPI_ISL_4003582|2021-07-02	20H	B.1.351	B.1.351	20H	Beta	20H (Beta, V2)
hCoV-19/South_Africa/KRISP-UFS-K022082/2021|EPI_ISL_4003583|2021-07-06	20H	B.1.351	B.1.351	20H	Beta	20H (Beta, V2)
hCoV-19/South_Africa/KRISP-UFS-K022042/2021|EPI_ISL_4003595|2021-07-11	21J	AY.45	B.1.617.2.45	21J	Delta	21J (Delta)
hCoV-19/South_Africa/KRISP-UFS-K022056/2021|EPI_ISL_4003603|2021-07-02	21J	AY.45	B.1.617.2.45	21J	Delta	21J (Delta)
hCoV-19/South_Africa/KRISP-UFS-K022100/2021|EPI_ISL_4003614|2021-07-06	21J	AY.45	B.1.617.2.45	21J	Delta	21J (Delta)
hCoV-19/South_Africa/KRISP-UFS-K022103/2021|EPI_ISL_4003615|2021-07-05	21J	AY.45	B.1.617.2.45	21J	Delta	21J (Delta)
hCoV-19/South_Africa/KRISP-UFS-K022087/2021|EPI_ISL_4003610|2021-07-06	21J	AY.45	B.1.617.2.45	21J	Delta	21J (Delta)
hCoV-19/South_Africa/KRISP-UFS-K022089/2021|EPI_ISL_4003612|2021-07-05	21J	AY.46	B.1.617.2.46	21J	Delta	21J (Delta)
hCoV-19/South_Africa/KRISP-UFS-K022093/2021|EPI_ISL_4003613|2021-07-05	21J	AY.45	B.1.617.2.45	21J	Delta	21J (Delta)
hCoV-19/South_Africa/KRISP-UFS-K022128/2021|EPI_ISL_4003625|2021-07-05	21J	AY.45	B.1.617.2.45	21J	Delta	21J (Delta)
hCoV-19/South_Africa/KRISP-UFS-K022153/2021|EPI_ISL_4003628|2021-07-05	21I	AY.38	B.1.617.2.38	21I	Delta	21I (Delta)
hCoV-19/South_Africa/KRISP-UFS-K022116/2021|EPI_ISL_4003622|2021-07-05	21J	AY.45	B.1.617.2.45	21J	Delta	21J (Delta)
hCoV-19/South_Africa/KRISP-UFS-K022126/2021|EPI_ISL_4003624|2021-07-05	21J	AY.45	B.1.617.2.45	21J	Delta	21J (Delta)
hCoV-19/South_Africa/KRISP-UFS-K022114/2021|EPI_ISL_4003620|2021-07-05	21J	AY.45	B.1.617.2.45	21J	Delta	21J (Delta)
hCoV-19/South_Africa/KRISP-UFS-K022176/2021|EPI_ISL_4003636|2021-07-02	21J	AY.45	B.1.617.2.45	21J	Delta	21J (Delta)
hCoV-19/South_Africa/KRISP-UFS-K022177/2021|EPI_ISL_4003637|2021-07-02	21J	AY.45	B.1.617.2.45	21J	Delta	21J (Delta)
hCoV-19/South_Africa/KRISP-UFS-K022183/2021|EPI_ISL_4003638|2021-07-06	21J	AY.99	B.1.617.2.99	21J	Delta	21J (Delta)
hCoV-19/South_Africa/KRISP-UFS-K022186/2021|EPI_ISL_4003639|2021-07-02	21J	B.1.617.2	B.1.617.2	21J	Delta	21J (Delta)
hCoV-19/South_Africa/KRISP-UFS-K022175/2021|EPI_ISL_4003635|2021-07-05	21J	AY.45	B.1.617.2.45	21J	Delta	21J (Delta)
hCoV-19/South_Africa/NICD-R10139/2021|EPI_ISL_4030017|2021-07-06	21J	AY.91	B.1.617.2.91	21J	Delta	21J (Delta)
hCoV-19/South_Africa/NICD-R10201/2021|EPI_ISL_4030029|2021-07-07	21J	AY.116	B.1.617.2.116	21J	Delta	21J (Delta)
hCoV-19/South_Africa/NICD-R10071/2021|EPI_ISL_4030026|2021-07-07	21J	AY.45	B.1.617.2.45	21J	Delta	21J (Delta)
hCoV-19/South_Africa/NICD-R10095/2021|EPI_ISL_4030075|2021-07-06	21J	AY.32	B.1.617.2.32	21J	Delta	21J (Delta)
hCoV-19/South_Africa/NICD-R10089/2021|EPI_ISL_4030074|2021-07-07	21J	AY.45	B.1.617.2.45	21J	Delta	21J (Delta)
hCoV-19/South_Africa/NICD-R10063/2021|EPI_ISL_4030071|2021-07-07	21J	AY.45	B.1.617.2.45	21J	Delta	21J (Delta)
hCoV-19/South_Africa/NICD-R10062/2021|EPI_ISL_4030070|2021-07-07	21J	AY.45	B.1.617.2.45	21J	Delta	21J (Delta)
hCoV-19/South_Africa/NICD-R10113/2021|EPI_ISL_4030076|2021-07-07	21J	AY.32	B.1.617.2.32	21J	Delta	21J (Delta)
hCoV-19/South_Africa/NICD-R10164/2021|EPI_ISL_4030079|2021-07-07	21J	AY.45	B.1.617.2.45	21J	Delta	21J (Delta)
hCoV-19/South_Africa/NICD-R10133/2021|EPI_ISL_4030078|2021-07-08	21J	AY.32	B.1.617.2.32	21J	Delta	21J (Delta)
hCoV-19/South_Africa/NICD-R10052/2021|EPI_ISL_4030069|2021-07-07	21J	AY.45	B.1.617.2.45	21J	Delta	21J (Delta)
hCoV-19/South_Africa/NICD-N14453/2021|EPI_ISL_4030066|2021-07-10	21J	AY.45	B.1.617.2.45	21J	Delta	21J (Delta)
hCoV-19/South_Africa/NICD-N14444/2021|EPI_ISL_4030065|2021-07-10	21J	AY.45	B.1.617.2.45	21J	Delta	21J (Delta)
hCoV-19/South_Africa/NICD-N14458/2021|EPI_ISL_4030068|2021-07-10	21J	AY.45	B.1.617.2.45	21J	Delta	21J (Delta)
hCoV-19/South_Africa/NICD-N14455/2021|EPI_ISL_4030067|2021-07-10	21J	AY.45	B.1.617.2.45	21J	Delta	21J (Delta)
hCoV-19/South_Africa/NICD-N14445/2021|EPI_ISL_4029951|2021-07-10	21J	AY.45	B.1.617.2.45	21J	Delta	21J (Delta)
hCoV-19/South_Africa/NICD-R10379/2021|EPI_ISL_4030091|2021-07-09	21J	AY.32	B.1.617.2.32	21J	Delta	21J (Delta)
hCoV-19/South_Africa/NICD-R10383/2021|EPI_ISL_4030092|2021-07-09	21J	AY.45	B.1.617.2.45	21J	Delta	21J (Delta)
hCoV-19/South_Africa/NICD-R10185/2021|EPI_ISL_4030084|2021-07-08	21J	AY.45	B.1.617.2.45	21J	Delta	21J (Delta)
hCoV-19/South_Africa/NICD-R10172/2021|EPI_ISL_4030083|2021-07-06	21J	AY.45	B.1.617.2.45	21J	Delta	21J (Delta)
hCoV-19/South_Africa/NICD-R10194/2021|EPI_ISL_4030086|2021-07-05	21A	AY.19	B.1.617.2.19	21A	Delta	21A (Delta)
hCoV-19/South_Africa/NICD-R10167/2021|EPI_ISL_4030080|2021-07-07	21J	AY.45	B.1.617.2.45	21J	Delta	21J (Delta)
hCoV-19/South_Africa/NICD-R10170/2021|EPI_ISL_4030082|2021-07-05	21J	AY.45	B.1.617.2.45	21J	Delta	21J (Delta)
hCoV-19/South_Africa/NICD-R10257/2021|EPI_ISL_4030088|2021-07-09	21J	AY.45	B.1.617.2.45	21J	Delta	21J (Delta)
hCoV-19/South_Africa/NICD-R10200/2021|EPI_ISL_4030087|2021-07-07	21J	AY.45	B.1.617.2.45	21J	Delta	21J (Delta)
hCoV-19/South_Africa/NICD-R10266/2021|EPI_ISL_4030089|2021-07-08	21J	AY.45	B.1.617.2.45	21J	Delta	21J (Delta)
hCoV-19/South_Africa/NICD-N12751/2021|EPI_ISL_5510279|2021-07-11	21J	B.1.617.2	B.1.617.2	21J	Delta	21J (Delta)
hCoV-19/South_Africa/NICD-N12794/2021|EPI_ISL_5510281|2021-07-09	21J	AY.45	B.1.617.2.45	21J	Delta	21J (Delta)
hCoV-19/Gambia/48841/2021|EPI_ISL_3150938|2021-07-09	21A	B.1.617.2	B.1.617.2	21A	Delta	21A (Delta)
hCoV-19/Botswana/R21B89_BHP_AAB78046/2021|EPI_ISL_2868413|2021-07-02	21J	AY.46	B.1.617.2.46	21J	Delta	21J (Delta)
hCoV-19/Botswana/R21B80_BHP_AAB78066/2021|EPI_ISL_2868410|2021-07-02	21J	AY.46	B.1.617.2.46	21J	Delta	21J (Delta)
hCoV-19/Botswana/R21B69_BHP_AAB78069/2021|EPI_ISL_2868407|2021-07-02	21J	AY.46	B.1.617.2.46	21J	Delta	21J (Delta)
hCoV-19/Botswana/R21B66_BHP_AAB78232/2021|EPI_ISL_2868406|2021-07-02	21J	B.1.617.2	B.1.617.2	21J	Delta	21J (Delta)
hCoV-19/Botswana/R21B74_BHP_AAB78362/2021|EPI_ISL_2868409|2021-07-02	21J	AY.45	B.1.617.2.45	21J	Delta	21J (Delta)
hCoV-19/Botswana/R21B72_BHP_AAB77950/2021|EPI_ISL_2868408|2021-07-02	21J	AY.46	B.1.617.2.46	21J	Delta	21J (Delta)
hCoV-19/Botswana/R21B37_BHP_AAB79085/2021|EPI_ISL_2868402|2021-07-04	21J	B.1.617.2	B.1.617.2	21J	Delta	21J (Delta)
hCoV-19/Botswana/R21B56_BHP_AAB79009/2021|EPI_ISL_2868405|2021-07-04	21J	AY.46	B.1.617.2.46	21J	Delta	21J (Delta)
hCoV-19/Botswana/R21B49_BHP_AAB78991/2021|EPI_ISL_2868404|2021-07-04	20C	B.1	B.1	20C	unassigned	20C
hCoV-19/Botswana/R21B34_BHP_AAB79204/2021|EPI_ISL_2868401|2021-07-04	21I	B.1.617.2	B.1.617.2	21I	Delta	21I (Delta)
hCoV-19/Botswana/R21B31_BHP_AAB79216/2021|EPI_ISL_2868400|2021-07-04	21J	B.1.617.2	B.1.617.2	21J	Delta	21J (Delta)
hCoV-19/Botswana/R21B26_BHP_AAB78192/2021|EPI_ISL_2868399|2021-07-02	21J	AY.46	B.1.617.2.46	21J	Delta	21J (Delta)
hCoV-19/Botswana/R21B3_BHP_AAB79024/2021|EPI_ISL_2868394|2021-07-04	21J	AY.45	B.1.617.2.45	21J	Delta	21J (Delta)
hCoV-19/Botswana/R21B22_BHP_AAB77887/2021|EPI_ISL_2868397|2021-07-02	21J	B.1.617.2	B.1.617.2	21J	Delta	21J (Delta)
hCoV-19/Nigeria/S09-93351/2021|EPI_ISL_3857331|2021-07-02	21A	B.1.617.2	B.1.617.2	21A	Delta	21A (Delta)
hCoV-19/Angola/CERI-KRISP-K021732/2021|EPI_ISL_3860117|2021-07-08	20H	B.1.351	B.1.351	20H	Beta	20H (Beta, V2)
hCoV-19/South_Africa/NICD-N10657/2021|EPI_ISL_2987331|2021-07-03	21J	AY.45	B.1.617.2.45	21J	Delta	21J (Delta)
hCoV-19/South_Africa/NICD-N10610/2021|EPI_ISL_2984915|2021-07-03	21J	AY.45	B.1.617.2.45	21J	Delta	21J (Delta)
hCoV-19/South_Africa/NICD-N10613/2021|EPI_ISL_2984918|2021-07-03	21J	AY.45	B.1.617.2.45	21J	Delta	21J (Delta)
hCoV-19/South_Africa/NICD-N10213/2021|EPI_ISL_2984801|2021-07-02	20D	C.1.2	B.1.1.1.1.2	20D	unassigned	20D
hCoV-19/South_Africa/NICD-N10815/2021|EPI_ISL_2987321|2021-07-03	20H	B.1.351	B.1.351	20H	Beta	20H (Beta, V2)
hCoV-19/South_Africa/NICD-N10636/2021|EPI_ISL_2987324|2021-07-03	21J	AY.45	B.1.617.2.45	21J	Delta	21J (Delta)
hCoV-19/Rwanda/NRLNAT4158/2021|EPI_ISL_3012194|2021-07-06	21I	B.1.617.2	B.1.617.2	21I	Delta	21I (Delta)
hCoV-19/Rwanda/NRLNAT4164/2021|EPI_ISL_3012199|2021-07-07	21J	AY.46	B.1.617.2.46	21J	Delta	21J (Delta)
hCoV-19/Rwanda/NRLNAT4156/2021|EPI_ISL_3012192|2021-07-07	21I	B.1.617.2	B.1.617.2	21I	Delta	21I (Delta)
hCoV-19/Rwanda/NRLNAT4154/2021|EPI_ISL_3012190|2021-07-07	21A	B.1.617.2	B.1.617.2	21A	Delta	21A (Delta)
hCoV-19/Rwanda/NRLNAT4146/2021|EPI_ISL_3012182|2021-07-06	21A	B.1.617.2	B.1.617.2	21A	Delta	21A (Delta)
hCoV-19/Rwanda/NRLNAT4166/2021|EPI_ISL_3012201|2021-07-07	21J	AY.46	B.1.617.2.46	21J	Delta	21J (Delta)
hCoV-19/Rwanda/NRLNAT4165/2021|EPI_ISL_3012200|2021-07-07	21I	B.1.617.2	B.1.617.2	21I	Delta	21I (Delta)
hCoV-19/Rwanda/NRLNAT4188/2021|EPI_ISL_3012221|2021-07-04	21J	AY.46	B.1.617.2.46	21J	Delta	21J (Delta)
hCoV-19/Rwanda/NRLNAT4191/2021|EPI_ISL_3012224|2021-07-06	21I	B.1.617.2	B.1.617.2	21I	Delta	21I (Delta)
hCoV-19/Rwanda/NRLNAT4189/2021|EPI_ISL_3012222|2021-07-09	21A	B.1.617.2	B.1.617.2	21A	Delta	21A (Delta)
hCoV-19/South_Africa/NICD-N10500/2021|EPI_ISL_3024682|2021-07-02	21J	AY.116	B.1.617.2.116	21J	Delta	21J (Delta)
hCoV-19/Congo/FCRM-42-A26-07-07/2021|EPI_ISL_3040129|2021-07-07	21A	B.1.617.2	B.1.617.2	21A	Delta	21A (Delta)
hCoV-19/South_Africa/Tygerberg_1316/2021|EPI_ISL_3032523|2021-07-06	20H	B.1.351	B.1.351	20H	Beta	20H (Beta, V2)
hCoV-19/Kenya/C102414/2021|EPI_ISL_3049774|2021-07-02	21J	AY.116	B.1.617.2.116	21J	Delta	21J (Delta)
hCoV-19/Kenya/C103168/2021|EPI_ISL_3049820|2021-07-07	21I	B.1.617.2	B.1.617.2	21I	Delta	21I (Delta)
hCoV-19/Kenya/C103181/2021|EPI_ISL_3049823|2021-07-07	21J	AY.116	B.1.617.2.116	21J	Delta	21J (Delta)
hCoV-19/Kenya/C103179/2021|EPI_ISL_3049822|2021-07-07	21J	AY.116	B.1.617.2.116	21J	Delta	21J (Delta)
hCoV-19/Kenya/C103184/2021|EPI_ISL_3049825|2021-07-07	21J	AY.116	B.1.617.2.116	21J	Delta	21J (Delta)
hCoV-19/Kenya/C103161/2021|EPI_ISL_3049816|2021-07-07	21J	AY.116	B.1.617.2.116	21J	Delta	21J (Delta)
hCoV-19/Kenya/C103612/2021|EPI_ISL_3049834|2021-07-09	21J	AY.116	B.1.617.2.116	21J	Delta	21J (Delta)
hCoV-19/Morocco/ION-CODE-101/2021|EPI_ISL_3071138|2021-07-08	20I	B.1.1.7	B.1.1.7	20I	Alpha	20I (Alpha, V1)
hCoV-19/South_Africa/NICD-N11042/2021|EPI_ISL_3074029|2021-07-02	21J	AY.45	B.1.617.2.45	21J	Delta	21J (Delta)
hCoV-19/South_Africa/NICD-N11271/2021|EPI_ISL_3074036|2021-07-03	21J	AY.122	B.1.617.2.122	21J	Delta	21J (Delta)
hCoV-19/South_Africa/NICD-N11272/2021|EPI_ISL_3074037|2021-07-02	21A	AY.19	B.1.617.2.19	21A	Delta	21A (Delta)
hCoV-19/South_Africa/NICD-N11273/2021|EPI_ISL_3074038|2021-07-05	21A	AY.19	B.1.617.2.19	21A	Delta	21A (Delta)
hCoV-19/South_Africa/NICD-N11274/2021|EPI_ISL_3074039|2021-07-02	21A	AY.19	B.1.617.2.19	21A	Delta	21A (Delta)
hCoV-19/South_Africa/NICD-N11264/2021|EPI_ISL_3074030|2021-07-02	21A	AY.19	B.1.617.2.19	21A	Delta	21A (Delta)
hCoV-19/South_Africa/NICD-N11266/2021|EPI_ISL_3074032|2021-07-02	21J	AY.45	B.1.617.2.45	21J	Delta	21J (Delta)
hCoV-19/South_Africa/NICD-N11277/2021|EPI_ISL_3074041|2021-07-05	21J	AY.45	B.1.617.2.45	21J	Delta	21J (Delta)
hCoV-19/South_Africa/NICD-N11024/2021|EPI_ISL_3074014|2021-07-02	21J	AY.45	B.1.617.2.45	21J	Delta	21J (Delta)
hCoV-19/South_Africa/NICD-N11518/2021|EPI_ISL_3101583|2021-07-02	21J	AY.45	B.1.617.2.45	21J	Delta	21J (Delta)
hCoV-19/South_Africa/NICD-N11523/2021|EPI_ISL_3101586|2021-07-02	21A	AY.19	B.1.617.2.19	21A	Delta	21A (Delta)
hCoV-19/South_Africa/NICD-N11826/2021|EPI_ISL_3101599|2021-07-07	21J	AY.45	B.1.617.2.45	21J	Delta	21J (Delta)
hCoV-19/South_Africa/NICD-N11819/2021|EPI_ISL_3101592|2021-07-07	21J	AY.45	B.1.617.2.45	21J	Delta	21J (Delta)
hCoV-19/South_Africa/NICD-N11820/2021|EPI_ISL_3101593|2021-07-07	21J	AY.45	B.1.617.2.45	21J	Delta	21J (Delta)
hCoV-19/South_Africa/NICD-N11823/2021|EPI_ISL_3101596|2021-07-07	20H	B.1.351	B.1.351	20H	Beta	20H (Beta, V2)
hCoV-19/South_Africa/NICD-N11825/2021|EPI_ISL_3101598|2021-07-07	21J	AY.45	B.1.617.2.45	21J	Delta	21J (Delta)
hCoV-19/South_Africa/NICD-N11824/2021|EPI_ISL_3101597|2021-07-06	21J	AY.45	B.1.617.2.45	21J	Delta	21J (Delta)
hCoV-19/South_Africa/NICD-N11303/2021|EPI_ISL_3101660|2021-07-05	21J	AY.45	B.1.617.2.45	21J	Delta	21J (Delta)
hCoV-19/South_Africa/NICD-N11299/2021|EPI_ISL_3101657|2021-07-06	21J	AY.45	B.1.617.2.45	21J	Delta	21J (Delta)
hCoV-19/South_Africa/NICD-N11302/2021|EPI_ISL_3101659|2021-07-05	21J	AY.45	B.1.617.2.45	21J	Delta	21J (Delta)
hCoV-19/South_Africa/NICD-N11300/2021|EPI_ISL_3101658|2021-07-05	21J	AY.45	B.1.617.2.45	21J	Delta	21J (Delta)
hCoV-19/South_Africa/NICD-N12012/2021|EPI_ISL_3101622|2021-07-10	21J	AY.45	B.1.617.2.45	21J	Delta	21J (Delta)
hCoV-19/South_Africa/NICD-N12019/2021|EPI_ISL_3101628|2021-07-10	21J	AY.45	B.1.617.2.45	21J	Delta	21J (Delta)
hCoV-19/South_Africa/NICD-N12007/2021|EPI_ISL_3101620|2021-07-10	21J	AY.45	B.1.617.2.45	21J	Delta	21J (Delta)
hCoV-19/South_Africa/NICD-N12005/2021|EPI_ISL_3101618|2021-07-10	21I	B.1.617.2	B.1.617.2	21I	Delta	21I (Delta)
hCoV-19/South_Africa/NICD-N12024/2021|EPI_ISL_3101632|2021-07-10	21J	AY.45	B.1.617.2.45	21J	Delta	21J (Delta)
hCoV-19/South_Africa/NICD-R10064/2021|EPI_ISL_3101635|2021-07-02	21J	AY.122	B.1.617.2.122	21J	Delta	21J (Delta)
hCoV-19/South_Africa/NICD-R10151/2021|EPI_ISL_3101636|2021-07-08	21J	AY.91	B.1.617.2.91	21J	Delta	21J (Delta)
hCoV-19/South_Africa/NICD-N12020/2021|EPI_ISL_3101629|2021-07-10	21A	AY.19	B.1.617.2.19	21A	Delta	21A (Delta)
hCoV-19/South_Africa/NICD-N11828/2021|EPI_ISL_3101601|2021-07-07	21J	AY.45	B.1.617.2.45	21J	Delta	21J (Delta)
hCoV-19/South_Africa/NICD-N11830/2021|EPI_ISL_3101603|2021-07-09	21J	AY.45	B.1.617.2.45	21J	Delta	21J (Delta)
hCoV-19/South_Africa/NICD-N11832/2021|EPI_ISL_3101605|2021-07-09	21J	AY.45	B.1.617.2.45	21J	Delta	21J (Delta)
hCoV-19/South_Africa/NICD-N11837/2021|EPI_ISL_3101610|2021-07-09	21J	AY.45	B.1.617.2.45	21J	Delta	21J (Delta)
hCoV-19/South_Africa/NICD-N11841/2021|EPI_ISL_3101613|2021-07-08	21J	AY.45	B.1.617.2.45	21J	Delta	21J (Delta)
hCoV-19/South_Africa/NICD-N11840/2021|EPI_ISL_3101612|2021-07-09	21J	AY.45	B.1.617.2.45	21J	Delta	21J (Delta)
hCoV-19/South_Africa/NICD-N11843/2021|EPI_ISL_3101615|2021-07-09	21J	AY.45	B.1.617.2.45	21J	Delta	21J (Delta)
hCoV-19/South_Africa/NICD-N11845/2021|EPI_ISL_3101617|2021-07-11	21J	AY.45	B.1.617.2.45	21J	Delta	21J (Delta)
hCoV-19/South_Africa/NICD-N11844/2021|EPI_ISL_3101616|2021-07-09	21J	AY.45	B.1.617.2.45	21J	Delta	21J (Delta)
hCoV-19/South_Africa/NICD-N11835/2021|EPI_ISL_3101608|2021-07-09	21J	AY.45	B.1.617.2.45	21J	Delta	21J (Delta)
hCoV-19/South_Africa/NICD-N11834/2021|EPI_ISL_3101607|2021-07-09	21J	AY.45	B.1.617.2.45	21J	Delta	21J (Delta)
hCoV-19/South_Africa/NICD-N11836/2021|EPI_ISL_3101609|2021-07-09	21J	AY.45	B.1.617.2.45	21J	Delta	21J (Delta)
hCoV-19/South_Africa/NICD-N11178/2021|EPI_ISL_3101489|2021-07-04	21I	B.1.617.2	B.1.617.2	21I	Delta	21I (Delta)
hCoV-19/South_Africa/NICD-N11182/2021|EPI_ISL_3101492|2021-07-05	21J	AY.45	B.1.617.2.45	21J	Delta	21J (Delta)
hCoV-19/South_Africa/NICD-N11187/2021|EPI_ISL_3101495|2021-07-04	20H	B.1.351	B.1.351	20H	Beta	20H (Beta, V2)
hCoV-19/South_Africa/NICD-N11190/2021|EPI_ISL_3101497|2021-07-03	21J	AY.45	B.1.617.2.45	21J	Delta	21J (Delta)
hCoV-19/South_Africa/NICD-N11188/2021|EPI_ISL_3101496|2021-07-03	21J	AY.45	B.1.617.2.45	21J	Delta	21J (Delta)
hCoV-19/South_Africa/NICD-N11192/2021|EPI_ISL_3101499|2021-07-06	21J	AY.45	B.1.617.2.45	21J	Delta	21J (Delta)
hCoV-19/South_Africa/NICD-N11191/2021|EPI_ISL_3101498|2021-07-06	21J	AY.45	B.1.617.2.45	21J	Delta	21J (Delta)
hCoV-19/South_Africa/NICD-N11181/2021|EPI_ISL_3101491|2021-07-03	21J	AY.45	B.1.617.2.45	21J	Delta	21J (Delta)
hCoV-19/South_Africa/NICD-N11296/2021|EPI_ISL_3101569|2021-07-02	21J	AY.45	B.1.617.2.45	21J	Delta	21J (Delta)
hCoV-19/South_Africa/NICD-N11285/2021|EPI_ISL_3101560|2021-07-02	21A	AY.19	B.1.617.2.19	21A	Delta	21A (Delta)
hCoV-19/South_Africa/NICD-N11255/2021|EPI_ISL_3101548|2021-07-03	21J	AY.45	B.1.617.2.45	21J	Delta	21J (Delta)
hCoV-19/South_Africa/NICD-N11246/2021|EPI_ISL_3101540|2021-07-02	21J	AY.45	B.1.617.2.45	21J	Delta	21J (Delta)
hCoV-19/South_Africa/NICD-N11280/2021|EPI_ISL_3101556|2021-07-05	21J	AY.45	B.1.617.2.45	21J	Delta	21J (Delta)
hCoV-19/South_Africa/NICD-N11263/2021|EPI_ISL_3101555|2021-07-02	21J	AY.45	B.1.617.2.45	21J	Delta	21J (Delta)
hCoV-19/South_Africa/NICD-N11281/2021|EPI_ISL_3101557|2021-07-02	21J	AY.45	B.1.617.2.45	21J	Delta	21J (Delta)
hCoV-19/South_Africa/NICD-N11283/2021|EPI_ISL_3101559|2021-07-02	21A	AY.19	B.1.617.2.19	21A	Delta	21A (Delta)
hCoV-19/South_Africa/NICD-N11259/2021|EPI_ISL_3101551|2021-07-02	21J	AY.45	B.1.617.2.45	21J	Delta	21J (Delta)
hCoV-19/South_Africa/NICD-N11226/2021|EPI_ISL_3101524|2021-07-03	21J	AY.45	B.1.617.2.45	21J	Delta	21J (Delta)
hCoV-19/South_Africa/NICD-N11228/2021|EPI_ISL_3101526|2021-07-03	21J	AY.45	B.1.617.2.45	21J	Delta	21J (Delta)
hCoV-19/South_Africa/NICD-N11221/2021|EPI_ISL_3101520|2021-07-03	21J	B.1.617.2	B.1.617.2	21J	Delta	21J (Delta)
hCoV-19/South_Africa/NICD-N11236/2021|EPI_ISL_3101531|2021-07-03	21J	AY.45	B.1.617.2.45	21J	Delta	21J (Delta)
hCoV-19/South_Africa/NICD-N11196/2021|EPI_ISL_3101501|2021-07-04	21J	AY.45	B.1.617.2.45	21J	Delta	21J (Delta)
hCoV-19/South_Africa/NICD-N11197/2021|EPI_ISL_3101502|2021-07-05	21I	B.1.617.2	B.1.617.2	21I	Delta	21I (Delta)
hCoV-19/South_Africa/NICD-N11203/2021|EPI_ISL_3101507|2021-07-03	21J	AY.45	B.1.617.2.45	21J	Delta	21J (Delta)
hCoV-19/South_Africa/NICD-N11209/2021|EPI_ISL_3101511|2021-07-04	21J	AY.45	B.1.617.2.45	21J	Delta	21J (Delta)
hCoV-19/South_Africa/NICD-N11214/2021|EPI_ISL_3101515|2021-07-03	21J	AY.45	B.1.617.2.45	21J	Delta	21J (Delta)
hCoV-19/South_Africa/NICD-N11217/2021|EPI_ISL_3101518|2021-07-05	21J	AY.45	B.1.617.2.45	21J	Delta	21J (Delta)
hCoV-19/South_Africa/NICD-N11216/2021|EPI_ISL_3101517|2021-07-03	21J	AY.45	B.1.617.2.45	21J	Delta	21J (Delta)
hCoV-19/Nigeria/CV1992/2021|EPI_ISL_3945359|2021-07-08	21J	AY.36	B.1.617.2.36	21J	Delta	21J (Delta)
hCoV-19/Mozambique/CERI-KRISP-K026090/2021|EPI_ISL_5942674|2021-07-06	21J	AY.122	B.1.617.2.122	21J	Delta	21J (Delta)
hCoV-19/Mozambique/CERI-KRISP-K026106/2021|EPI_ISL_5942673|2021-07-09	21J	AY.122	B.1.617.2.122	21J	Delta	21J (Delta)
hCoV-19/South_Africa/NICD-N14048/2021|EPI_ISL_4253664|2021-07-11	21J	AY.45	B.1.617.2.45	21J	Delta	21J (Delta)
hCoV-19/Reunion/CHU7210721300/2021|EPI_ISL_6779336|2021-07-09	20H	B.1.351.2	B.1.351.2	20H	Beta	20H (Beta, V2)
hCoV-19/Reunion/CHU5210710031/2021|EPI_ISL_6779340|2021-07-09	20H	B.1.351.2	B.1.351.2	20H	Beta	20H (Beta, V2)
hCoV-19/Eswatini/N13420/2021|EPI_ISL_4301806|2021-07-08	21J	AY.45	B.1.617.2.45	21J	Delta	21J (Delta)
hCoV-19/Eswatini/N13424/2021|EPI_ISL_4301809|2021-07-09	20H	B.1.351	B.1.351	20H	Beta	20H (Beta, V2)
hCoV-19/Eswatini/N13422/2021|EPI_ISL_4301808|2021-07-08	21J	AY.45	B.1.617.2.45	21J	Delta	21J (Delta)
hCoV-19/Eswatini/N13427/2021|EPI_ISL_4301812|2021-07-08	21J	AY.6	B.1.617.2.6	21J	Delta	21J (Delta)
hCoV-19/Eswatini/N13414/2021|EPI_ISL_4301801|2021-07-08	21J	AY.45	B.1.617.2.45	21J	Delta	21J (Delta)
hCoV-19/Eswatini/N13413/2021|EPI_ISL_4301800|2021-07-08	21J	AY.45	B.1.617.2.45	21J	Delta	21J (Delta)
hCoV-19/Eswatini/N13416/2021|EPI_ISL_4301803|2021-07-08	21J	AY.45	B.1.617.2.45	21J	Delta	21J (Delta)
hCoV-19/Eswatini/N13415/2021|EPI_ISL_4301802|2021-07-08	21J	AY.45	B.1.617.2.45	21J	Delta	21J (Delta)
hCoV-19/Eswatini/N13449/2021|EPI_ISL_4301832|2021-07-07	21J	AY.45	B.1.617.2.45	21J	Delta	21J (Delta)
hCoV-19/Eswatini/N13450/2021|EPI_ISL_4301833|2021-07-08	21I	B.1.617.2	B.1.617.2	21I	Delta	21I (Delta)
hCoV-19/Eswatini/N13433/2021|EPI_ISL_4301817|2021-07-07	21J	AY.45	B.1.617.2.45	21J	Delta	21J (Delta)
hCoV-19/Eswatini/N13457/2021|EPI_ISL_4301840|2021-07-07	21J	AY.46	B.1.617.2.46	21J	Delta	21J (Delta)
hCoV-19/Eswatini/N13390/2021|EPI_ISL_4301780|2021-07-02	21J	AY.45	B.1.617.2.45	21J	Delta	21J (Delta)
hCoV-19/Eswatini/N13364/2021|EPI_ISL_4301758|2021-07-04	21A	AY.19	B.1.617.2.19	21A	Delta	21A (Delta)
hCoV-19/Eswatini/N13379/2021|EPI_ISL_4301770|2021-07-03	21J	AY.45	B.1.617.2.45	21J	Delta	21J (Delta)
hCoV-19/Eswatini/N13377/2021|EPI_ISL_4301769|2021-07-03	21J	AY.116	B.1.617.2.116	21J	Delta	21J (Delta)
hCoV-19/Morocco/RA2C/2021|EPI_ISL_4309589|2021-07-04	21H	B.1.621	B.1.621	21H	Mu	21H (Mu)
hCoV-19/South_Africa/NICD-R10131/2021|EPI_ISL_4029952|2021-07-08	21J	AY.32	B.1.617.2.32	21J	Delta	21J (Delta)
hCoV-19/South_Africa/NICD-R10068/2021|EPI_ISL_4030072|2021-07-07	21J	AY.45	B.1.617.2.45	21J	Delta	21J (Delta)
hCoV-19/South_Africa/NICD-R10077/2021|EPI_ISL_4030073|2021-07-07	21J	AY.45	B.1.617.2.45	21J	Delta	21J (Delta)
hCoV-19/South_Africa/NICD-R10119/2021|EPI_ISL_4030077|2021-07-08	21J	AY.32	B.1.617.2.32	21J	Delta	21J (Delta)
hCoV-19/South_Africa/NICD-R10169/2021|EPI_ISL_4030081|2021-07-05	21J	AY.45	B.1.617.2.45	21J	Delta	21J (Delta)
hCoV-19/South_Africa/NICD-R10193/2021|EPI_ISL_4030085|2021-07-06	21J	AY.45	B.1.617.2.45	21J	Delta	21J (Delta)
hCoV-19/South_Africa/NICD-R10274/2021|EPI_ISL_4030090|2021-07-09	21J	AY.45	B.1.617.2.45	21J	Delta	21J (Delta)
hCoV-19/Morocco/CNRST-INH5900/2021|EPI_ISL_6002900|2021-07-08	21J	AY.33	B.1.617.2.33	21J	Delta	21J (Delta)
hCoV-19/Nigeria/CV3478/2021|EPI_ISL_6002879|2021-07-10	21J	AY.99	B.1.617.2.99	21J	Delta	21J (Delta)
hCoV-19/Morocco/CNRST-INH5858/2021|EPI_ISL_6002899|2021-07-07	21J	AY.33	B.1.617.2.33	21J	Delta	21J (Delta)
hCoV-19/South_Africa/NICD-N12753/2021|EPI_ISL_3342225|2021-07-10	21J	AY.45	B.1.617.2.45	21J	Delta	21J (Delta)
hCoV-19/Zambia/ZMB-108841/2021|EPI_ISL_4513670|2021-07-07	21J	AY.116	B.1.617.2.116	21J	Delta	21J (Delta)
hCoV-19/Zambia/ZMB-108844/2021|EPI_ISL_4513671|2021-07-07	21J	AY.116	B.1.617.2.116	21J	Delta	21J (Delta)
hCoV-19/Zambia/ZMB-108852/2021|EPI_ISL_4513674|2021-07-07	21J	AY.116.1	B.1.617.2.116.1	21J	Delta	21J (Delta)
hCoV-19/Zambia/ZMB-108858/2021|EPI_ISL_4513675|2021-07-07	21J	AY.116	B.1.617.2.116	21J	Delta	21J (Delta)
hCoV-19/Zambia/ZMB-108851/2021|EPI_ISL_4513673|2021-07-07	21J	AY.116	B.1.617.2.116	21J	Delta	21J (Delta)
hCoV-19/Zambia/ZMB-108878/2021|EPI_ISL_4513676|2021-07-07	21J	AY.116	B.1.617.2.116	21J	Delta	21J (Delta)
hCoV-19/Zambia/ZMB-108837/2021|EPI_ISL_4513666|2021-07-07	21J	AY.116	B.1.617.2.116	21J	Delta	21J (Delta)
hCoV-19/Zambia/ZMB-108160/2021|EPI_ISL_4513630|2021-07-04	21J	AY.91	B.1.617.2.91	21J	Delta	21J (Delta)
hCoV-19/Zambia/ZMB-107907/2021|EPI_ISL_4513623|2021-07-04	21J	AY.116	B.1.617.2.116	21J	Delta	21J (Delta)
hCoV-19/Zambia/ZMB-107978/2021|EPI_ISL_4513626|2021-07-04	21J	AY.116	B.1.617.2.116	21J	Delta	21J (Delta)
hCoV-19/Zambia/ZMB-108023/2021|EPI_ISL_4513629|2021-07-04	21J	AY.116.1	B.1.617.2.116.1	21J	Delta	21J (Delta)
hCoV-19/Zambia/ZMB-108724/2021|EPI_ISL_4513650|2021-07-05	21J	AY.116	B.1.617.2.116	21J	Delta	21J (Delta)
hCoV-19/Zambia/ZMB-108727/2021|EPI_ISL_4513651|2021-07-05	21J	AY.116.1	B.1.617.2.116.1	21J	Delta	21J (Delta)
hCoV-19/Zambia/ZMB-108734/2021|EPI_ISL_4513657|2021-07-05	21J	AY.116	B.1.617.2.116	21J	Delta	21J (Delta)
hCoV-19/Zambia/ZMB-108731/2021|EPI_ISL_4513654|2021-07-05	21J	AY.116	B.1.617.2.116	21J	Delta	21J (Delta)
hCoV-19/Zambia/ZMB-108712/2021|EPI_ISL_4513646|2021-07-05	21J	AY.116	B.1.617.2.116	21J	Delta	21J (Delta)
hCoV-19/Zambia/ZMB-108705/2021|EPI_ISL_4513643|2021-07-05	21J	AY.116	B.1.617.2.116	21J	Delta	21J (Delta)
hCoV-19/Zambia/ZMB-108708/2021|EPI_ISL_4513644|2021-07-05	21J	AY.116.1	B.1.617.2.116.1	21J	Delta	21J (Delta)
hCoV-19/Zambia/ZMB-115014/2021|EPI_ISL_4513730|2021-07-08	21J	AY.116	B.1.617.2.116	21J	Delta	21J (Delta)
hCoV-19/Kenya/KEM_CVR_102738/2021|EPI_ISL_4515707|2021-07-02	21A	B.1.617.2	B.1.617.2	21A	Delta	21A (Delta)
hCoV-19/Kenya/KEM-CVR-102772/2021|EPI_ISL_4515845|2021-07-05	21A	AY.16	B.1.617.2.16	21A	Delta	21A (Delta)
hCoV-19/Kenya/KEM_CVR_102768/2021|EPI_ISL_4515844|2021-07-02	21I	B.1.617.2	B.1.617.2	21I	Delta	21I (Delta)
hCoV-19/Kenya/KEM-CVR-102815/2021|EPI_ISL_4515901|2021-07-07	21A	AY.16	B.1.617.2.16	21A	Delta	21A (Delta)
hCoV-19/Kenya/KEM-CVR-102812/2021|EPI_ISL_4515900|2021-07-07	21A	AY.16	B.1.617.2.16	21A	Delta	21A (Delta)
hCoV-19/Kenya/KEMRI-CVR102939/2021|EPI_ISL_4515905|2021-07-08	21A	AY.16	B.1.617.2.16	21A	Delta	21A (Delta)
hCoV-19/Kenya/KEM-CVR-102864/2021|EPI_ISL_4515904|2021-07-08	21A	AY.16	B.1.617.2.16	21A	Delta	21A (Delta)
hCoV-19/Kenya/KEM_CVR_102883/2021|EPI_ISL_4515338|2021-07-08	21A	AY.16	B.1.617.2.16	21A	Delta	21A (Delta)
hCoV-19/South_Africa/NICD-N12790/2021|EPI_ISL_3342254|2021-07-10	21J	AY.45	B.1.617.2.45	21J	Delta	21J (Delta)
hCoV-19/South_Africa/NICD-N12803/2021|EPI_ISL_3342261|2021-07-08	21J	AY.45	B.1.617.2.45	21J	Delta	21J (Delta)
hCoV-19/South_Africa/NICD-N12809/2021|EPI_ISL_3342264|2021-07-07	21J	AY.45	B.1.617.2.45	21J	Delta	21J (Delta)
hCoV-19/Benin/456664/2021|EPI_ISL_4566921|2021-07-03	21I	AY.37	B.1.617.2.37	21I	Delta	21I (Delta)
hCoV-19/Angola/CERI-KRISP-K023597/2021|EPI_ISL_4575064|2021-07-04	20H	B.1.351	B.1.351	20H	Beta	20H (Beta, V2)
hCoV-19/Angola/CERI-KRISP-K023647/2021|EPI_ISL_4575116|2021-07-09	20I	B.1.1.7	B.1.1.7	20I	Alpha	20I (Alpha, V1)
hCoV-19/South_Africa/NICD-N13119/2021|EPI_ISL_3342288|2021-07-04	21J	AY.99	B.1.617.2.99	21J	Delta	21J (Delta)
hCoV-19/South_Africa/NICD-N14119/2021|EPI_ISL_4649994|2021-07-02	21J	AY.32	B.1.617.2.32	21J	Delta	21J (Delta)
hCoV-19/South_Africa/NICD-N14481/2021|EPI_ISL_4652191|2021-07-10	21J	AY.45	B.1.617.2.45	21J	Delta	21J (Delta)
hCoV-19/South_Africa/NICD-N14118/2021|EPI_ISL_4652265|2021-07-07	21J	AY.32	B.1.617.2.32	21J	Delta	21J (Delta)
hCoV-19/South_Africa/NICD-N14105/2021|EPI_ISL_4652210|2021-07-10	21J	AY.32	B.1.617.2.32	21J	Delta	21J (Delta)
hCoV-19/Rwanda/CV2241/2021|EPI_ISL_4768088|2021-07-06	21A	B.1.617.2	B.1.617.2	21A	Delta	21A (Delta)
hCoV-19/Rwanda/CV2228/2021|EPI_ISL_4768055|2021-07-10	21I	AY.55	B.1.617.2.55	21I	Delta	21I (Delta)
hCoV-19/Rwanda/CV2235/2021|EPI_ISL_4768094|2021-07-06	21J	AY.46.5	B.1.617.2.46.5	21J	Delta	21J (Delta)
hCoV-19/Rwanda/CV2245/2021|EPI_ISL_4768137|2021-07-06	21I	AY.55	B.1.617.2.55	21I	Delta	21I (Delta)
hCoV-19/Rwanda/CV2230/2021|EPI_ISL_4768140|2021-07-05	21A	B.1.617.2	B.1.617.2	21A	Delta	21A (Delta)
hCoV-19/Rwanda/CV2225/2021|EPI_ISL_4768106|2021-07-06	21I	AY.55	B.1.617.2.55	21I	Delta	21I (Delta)
hCoV-19/Rwanda/CV2244/2021|EPI_ISL_4768109|2021-07-06	21A	B.1.617.2	B.1.617.2	21A	Delta	21A (Delta)
hCoV-19/South_Africa/NICD-N12534/2021|EPI_ISL_3342167|2021-07-10	21J	AY.45	B.1.617.2.45	21J	Delta	21J (Delta)
hCoV-19/South_Africa/NICD-N12754/2021|EPI_ISL_3342226|2021-07-11	21J	AY.45	B.1.617.2.45	21J	Delta	21J (Delta)
hCoV-19/South_Africa/NICD-N12784/2021|EPI_ISL_3342250|2021-07-08	20H	B.1.351	B.1.351	20H	Beta	20H (Beta, V2)
hCoV-19/South_Africa/NICD-N11995/2021|EPI_ISL_3451132|2021-07-10	21J	AY.45	B.1.617.2.45	21J	Delta	21J (Delta)
hCoV-19/South_Africa/NICD-N12763/2021|EPI_ISL_3342233|2021-07-10	21J	AY.45	B.1.617.2.45	21J	Delta	21J (Delta)
hCoV-19/Botswana/R21B45_BHP_AAB78979/2021|EPI_ISL_2868403|2021-07-04	21J	AY.46	B.1.617.2.46	21J	Delta	21J (Delta)
hCoV-19/Botswana/R21B8_BHP_AAB78419/2021|EPI_ISL_2868395|2021-07-02	21J	AY.46	B.1.617.2.46	21J	Delta	21J (Delta)
hCoV-19/South_Africa/NICD-N12001/2021|EPI_ISL_3451138|2021-07-09	21J	AY.45	B.1.617.2.45	21J	Delta	21J (Delta)
hCoV-19/South_Africa/NICD-N13020/2021|EPI_ISL_3451334|2021-07-08	21J	AY.45	B.1.617.2.45	21J	Delta	21J (Delta)
hCoV-19/South_Africa/NICD-N13040/2021|EPI_ISL_3451352|2021-07-07	21J	AY.45	B.1.617.2.45	21J	Delta	21J (Delta)
hCoV-19/South_Africa/NICD-N12713/2021|EPI_ISL_3451273|2021-07-07	20H	B.1.351	B.1.351	20H	Beta	20H (Beta, V2)
hCoV-19/South_Africa/NICD-N13016/2021|EPI_ISL_3451330|2021-07-07	21J	AY.45	B.1.617.2.45	21J	Delta	21J (Delta)
hCoV-19/South_Africa/NICD-N11997/2021|EPI_ISL_3451134|2021-07-10	21A	AY.19	B.1.617.2.19	21A	Delta	21A (Delta)
hCoV-19/South_Africa/NICD-N14142/2021|EPI_ISL_3717932|2021-07-07	20D	C.1.2	B.1.1.1.1.2	20D	unassigned	20D
hCoV-19/South_Africa/NICD-N12649/2021|EPI_ISL_3451223|2021-07-08	21I	B.1.617.2	B.1.617.2	21I	Delta	21I (Delta)
hCoV-19/Kenya/ILRI_COVC23887/2021|EPI_ISL_4251988|2021-07-07	21J	AY.46	B.1.617.2.46	21J	Delta	21J (Delta)
hCoV-19/Ghana/WACCBIP-GS956/2021|EPI_ISL_2968009|2021-07-05	21I	AY.75	B.1.617.2.75	21I	Delta	21I (Delta)
hCoV-19/Eswatini/N13385/2021|EPI_ISL_4301775|2021-07-04	21J	AY.45	B.1.617.2.45	21J	Delta	21J (Delta)
hCoV-19/Eswatini/N13446/2021|EPI_ISL_4301829|2021-07-07	21J	AY.116	B.1.617.2.116	21J	Delta	21J (Delta)
hCoV-19/South_Africa/NICD-N10624/2021|EPI_ISL_2984929|2021-07-02	21J	AY.45	B.1.617.2.45	21J	Delta	21J (Delta)
hCoV-19/South_Africa/NICD-N10651/2021|EPI_ISL_2987330|2021-07-02	21J	AY.45	B.1.617.2.45	21J	Delta	21J (Delta)
hCoV-19/Kenya/KEM_CVR_102867/2021|EPI_ISL_4515253|2021-07-08	21A	AY.16	B.1.617.2.16	21A	Delta	21A (Delta)
hCoV-19/Kenya/KEM-CVR-102859/2021|EPI_ISL_4515903|2021-07-08	21A	AY.16	B.1.617.2.16	21A	Delta	21A (Delta)
hCoV-19/Nigeria/CV3170/2021|EPI_ISL_6002571|2021-07-09	21J	AY.36	B.1.617.2.36	21J	Delta	21J (Delta)
hCoV-19/Rwanda/NRLNAT4145/2021|EPI_ISL_3012181|2021-07-06	21A	B.1.617.2	B.1.617.2	21A	Delta	21A (Delta)
hCoV-19/Rwanda/NRLNAT4168/2021|EPI_ISL_3012203|2021-07-07	21A	B.1.617.2	B.1.617.2	21A	Delta	21A (Delta)
hCoV-19/Rwanda/NRLNAT4190/2021|EPI_ISL_3012223|2021-07-06	21A	B.1.617.2	B.1.617.2	21A	Delta	21A (Delta)
hCoV-19/Rwanda/NRLNAT4169/2021|EPI_ISL_3012204|2021-07-05	21A	B.1.617.2	B.1.617.2	21A	Delta	21A (Delta)
hCoV-19/Rwanda/NRLNAT4163/2021|EPI_ISL_3012198|2021-07-07	21J	AY.32	B.1.617.2.32	21J	Delta	21J (Delta)
hCoV-19/South_Africa/Tygerberg_1283/2021|EPI_ISL_3032492|2021-07-06	21I	AY.38	B.1.617.2.38	21I	Delta	21I (Delta)
hCoV-19/Congo/FCRM-43-A29-03-07/2021|EPI_ISL_3040130|2021-07-03	21A	B.1.617.2	B.1.617.2	21A	Delta	21A (Delta)
hCoV-19/Congo/FCRM-46-9091/2021|EPI_ISL_3040133|2021-07-06	21A	B.1.617.2	B.1.617.2	21A	Delta	21A (Delta)
hCoV-19/South_Africa/NICD-N11038/2021|EPI_ISL_3074027|2021-07-02	21J	AY.45	B.1.617.2.45	21J	Delta	21J (Delta)
hCoV-19/South_Africa/NICD-N11040/2021|EPI_ISL_3074028|2021-07-03	21J	AY.45	B.1.617.2.45	21J	Delta	21J (Delta)
hCoV-19/Uganda/UG620/2021|EPI_ISL_3149361|2021-07-02	21J	AY.46.6	B.1.617.2.46.6	21J	Delta	21J (Delta)
hCoV-19/South_Africa/NICD-N11183/2021|EPI_ISL_3101493|2021-07-02	21J	AY.45	B.1.617.2.45	21J	Delta	21J (Delta)
hCoV-19/South_Africa/NICD-N11199/2021|EPI_ISL_3101504|2021-07-06	21J	AY.122	B.1.617.2.122	21J	Delta	21J (Delta)
hCoV-19/South_Africa/NICD-N11213/2021|EPI_ISL_3101514|2021-07-03	21J	AY.45	B.1.617.2.45	21J	Delta	21J (Delta)
hCoV-19/South_Africa/NICD-N11225/2021|EPI_ISL_3101523|2021-07-03	21A	B.1.617.2	B.1.617.2	21A	Delta	21A (Delta)
hCoV-19/South_Africa/NICD-N11293/2021|EPI_ISL_3101566|2021-07-02	21A	AY.19	B.1.617.2.19	21A	Delta	21A (Delta)
hCoV-19/South_Africa/NICD-N11827/2021|EPI_ISL_3101600|2021-07-07	21J	AY.45	B.1.617.2.45	21J	Delta	21J (Delta)
hCoV-19/South_Africa/NICD-N11831/2021|EPI_ISL_3101604|2021-07-09	21J	AY.45	B.1.617.2.45	21J	Delta	21J (Delta)
hCoV-19/South_Africa/NICD-N11833/2021|EPI_ISL_3101606|2021-07-11	21J	AY.45	B.1.617.2.45	21J	Delta	21J (Delta)
hCoV-19/South_Africa/NICD-N11839/2021|EPI_ISL_3101611|2021-07-10	21J	AY.45	B.1.617.2.45	21J	Delta	21J (Delta)
hCoV-19/South_Africa/NICD-R10244/2021|EPI_ISL_3101638|2021-07-09	21J	AY.45	B.1.617.2.45	21J	Delta	21J (Delta)
hCoV-19/Reunion/HCL021125590801/2021|EPI_ISL_3130372|2021-07-06	20H	B.1.351	B.1.351	20H	Beta	20H (Beta, V2)
hCoV-19/Reunion/HCL021128471001/2021|EPI_ISL_3130976|2021-07-06	20H	B.1.351	B.1.351	20H	Beta	20H (Beta, V2)
hCoV-19/Reunion/HCL021128485401/2021|EPI_ISL_3130987|2021-07-06	20H	B.1.351	B.1.351	20H	Beta	20H (Beta, V2)
hCoV-19/Reunion/HCL021128486601/2021|EPI_ISL_3130988|2021-07-06	20H	B.1.351	B.1.351	20H	Beta	20H (Beta, V2)
hCoV-19/Reunion/HCL021128459001/2021|EPI_ISL_3130973|2021-07-06	20H	B.1.351.2	B.1.351.2	20H	Beta	20H (Beta, V2)
hCoV-19/Reunion/PIMIT_15243/2021|EPI_ISL_3154015|2021-07-09	20H	B.1.351.2	B.1.351.2	20H	Beta	20H (Beta, V2)
hCoV-19/Reunion/PIMIT_15616/2021|EPI_ISL_3154020|2021-07-08	20H	B.1.351.2	B.1.351.2	20H	Beta	20H (Beta, V2)
hCoV-19/Rwanda/NRLNAT4153/2021|EPI_ISL_3012189|2021-07-06	20H	B.1.351	B.1.351	20H	Beta	20H (Beta, V2)
hCoV-19/Rwanda/NRLNAT4157/2021|EPI_ISL_3012193|2021-07-07	21A	B.1.617.2	B.1.617.2	21A	Delta	21A (Delta)
hCoV-19/Reunion/PIMIT_14696/2021|EPI_ISL_3154026|2021-07-02	20H	B.1.351.2	B.1.351.2	20H	Beta	20H (Beta, V2)
hCoV-19/Reunion/PIMIT_14532/2021|EPI_ISL_3154068|2021-07-03	20H	B.1.351.2	B.1.351.2	20H	Beta	20H (Beta, V2)
hCoV-19/Reunion/PIMIT_14655/2021|EPI_ISL_3154069|2021-07-03	20H	B.1.351.2	B.1.351.2	20H	Beta	20H (Beta, V2)
hCoV-19/Reunion/PIMIT_14659/2021|EPI_ISL_3154070|2021-07-03	20H	B.1.351.2	B.1.351.2	20H	Beta	20H (Beta, V2)
hCoV-19/Reunion/PIMIT_14973/2021|EPI_ISL_3154076|2021-07-02	20H	B.1.351.2	B.1.351.2	20H	Beta	20H (Beta, V2)
hCoV-19/Reunion/PIMIT_15297/2021|EPI_ISL_3154080|2021-07-10	20H	B.1.351.2	B.1.351.2	20H	Beta	20H (Beta, V2)
hCoV-19/Reunion/PIMIT_15479/2021|EPI_ISL_3154082|2021-07-11	20H	B.1.351.2	B.1.351.2	20H	Beta	20H (Beta, V2)
hCoV-19/Reunion/PIMIT_14690/2021|EPI_ISL_3154249|2021-07-02	20H	B.1.351.2	B.1.351.2	20H	Beta	20H (Beta, V2)
hCoV-19/Reunion/PIMIT_15171/2021|EPI_ISL_3154260|2021-07-07	20H	B.1.351.2	B.1.351.2	20H	Beta	20H (Beta, V2)
hCoV-19/Reunion/PIMIT_15293/2021|EPI_ISL_3154264|2021-07-09	20H	B.1.351.2	B.1.351.2	20H	Beta	20H (Beta, V2)
hCoV-19/Reunion/PIMIT_15302/2021|EPI_ISL_3154266|2021-07-10	20H	B.1.351.2	B.1.351.2	20H	Beta	20H (Beta, V2)
hCoV-19/Reunion/PIMIT_15316/2021|EPI_ISL_3154267|2021-07-09	20H	B.1.351.2	B.1.351.2	20H	Beta	20H (Beta, V2)
hCoV-19/Reunion/PIMIT_15493/2021|EPI_ISL_3154268|2021-07-11	20H	B.1.351.2	B.1.351.2	20H	Beta	20H (Beta, V2)
hCoV-19/Reunion/PIMIT_15474/2021|EPI_ISL_3153832|2021-07-10	20H	B.1.351	B.1.351	20H	Beta	20H (Beta, V2)
hCoV-19/Reunion/PIMIT_15373/2021|EPI_ISL_3153970|2021-07-08	20H	B.1.351	B.1.351	20H	Beta	20H (Beta, V2)
hCoV-19/Zambia/ZMB-108015/2021|EPI_ISL_4513628|2021-07-04	21J	AY.116	B.1.617.2.116	21J	Delta	21J (Delta)
hCoV-19/Zambia/ZMB-108730/2021|EPI_ISL_4513653|2021-07-05	21J	AY.116	B.1.617.2.116	21J	Delta	21J (Delta)
hCoV-19/Reunion/PIMIT_15291/2021|EPI_ISL_3153863|2021-07-09	20H	B.1.351	B.1.351	20H	Beta	20H (Beta, V2)
hCoV-19/Reunion/PIMIT_15580/2021|EPI_ISL_3153867|2021-07-08	20H	B.1.351	B.1.351	20H	Beta	20H (Beta, V2)
hCoV-19/Reunion/PIMIT_15591/2021|EPI_ISL_3153868|2021-07-08	20H	B.1.351	B.1.351	20H	Beta	20H (Beta, V2)
hCoV-19/Reunion/PIMIT_15615/2021|EPI_ISL_3153869|2021-07-08	20H	B.1.351	B.1.351	20H	Beta	20H (Beta, V2)
hCoV-19/Reunion/PIMIT_15246/2021|EPI_ISL_3153963|2021-07-09	20H	B.1.351	B.1.351	20H	Beta	20H (Beta, V2)
hCoV-19/Reunion/PIMIT_15310/2021|EPI_ISL_3153967|2021-07-10	20H	B.1.351	B.1.351	20H	Beta	20H (Beta, V2)
hCoV-19/Reunion/PIMIT_15486/2021|EPI_ISL_3153973|2021-07-11	20H	B.1.351	B.1.351	20H	Beta	20H (Beta, V2)
hCoV-19/Reunion/PIMIT_15496/2021|EPI_ISL_3153974|2021-07-11	20H	B.1.351	B.1.351	20H	Beta	20H (Beta, V2)
hCoV-19/Reunion/PIMIT_15675/2021|EPI_ISL_3153987|2021-07-10	20H	B.1.351.2	B.1.351.2	20H	Beta	20H (Beta, V2)
hCoV-19/Reunion/PIMIT_15688/2021|EPI_ISL_3153991|2021-07-11	20H	B.1.351.2	B.1.351.2	20H	Beta	20H (Beta, V2)
hCoV-19/Zambia/ZMB-111484/2021|EPI_ISL_4513704|2021-07-09	21J	AY.116	B.1.617.2.116	21J	Delta	21J (Delta)
hCoV-19/Reunion/PIMIT_15500/2021|EPI_ISL_3154269|2021-07-10	20H	B.1.351.2	B.1.351.2	20H	Beta	20H (Beta, V2)
hCoV-19/Reunion/PIMIT_15613/2021|EPI_ISL_3154271|2021-07-08	20H	B.1.351.2	B.1.351.2	20H	Beta	20H (Beta, V2)
hCoV-19/Reunion/PIMIT_15365/2021|EPI_ISL_3154337|2021-07-08	20H	B.1.351.2	B.1.351.2	20H	Beta	20H (Beta, V2)
hCoV-19/Kenya/ILRI_COVC24484/2021|EPI_ISL_6093453|2021-07-08	20I	B.1.1.7	B.1.1.7	20I	Alpha	20I (Alpha, V1)
hCoV-19/Kenya/ILRI_COVM00916/2021|EPI_ISL_6094515|2021-07-02	21A	AY.16	B.1.617.2.16	21A	Delta	21A (Delta)
hCoV-19/Malawi/CERI-KRISP-K022842/2021|EPI_ISL_4473156|2021-07-09	21I	B.1.617.2	B.1.617.2	21I	Delta	21I (Delta)
hCoV-19/Nigeria/CV2385/2021|EPI_ISL_4490030|2021-07-05	21J	AY.109	B.1.617.2.109	21J	Delta	21J (Delta)
hCoV-19/Reunion/PIMIT_15254/2021|EPI_ISL_3153989|2021-07-09	20H	B.1.351.2	B.1.351.2	20H	Beta	20H (Beta, V2)
hCoV-19/Reunion/PIMIT_14966/2021|EPI_ISL_3154362|2021-07-02	20H	B.1.351.2	B.1.351.2	20H	Beta	20H (Beta, V2)
hCoV-19/Reunion/PIMIT_15473/2021|EPI_ISL_3153831|2021-07-10	20H	B.1.351	B.1.351	20H	Beta	20H (Beta, V2)
hCoV-19/Reunion/HCL021130421701/2021|EPI_ISL_3205464|2021-07-06	20H	B.1.351.2	B.1.351.2	20H	Beta	20H (Beta, V2)
hCoV-19/Reunion/HCL021130429901/2021|EPI_ISL_3205467|2021-07-06	20H	B.1.351.2	B.1.351.2	20H	Beta	20H (Beta, V2)
hCoV-19/Reunion/HCL021130432201/2021|EPI_ISL_3205468|2021-07-06	20H	B.1.351.2	B.1.351.2	20H	Beta	20H (Beta, V2)
hCoV-19/Reunion/HCL021130463801/2021|EPI_ISL_3205475|2021-07-06	20H	B.1.351	B.1.351	20H	Beta	20H (Beta, V2)
hCoV-19/Reunion/HCL021130472101/2021|EPI_ISL_3205479|2021-07-06	20H	B.1.351	B.1.351	20H	Beta	20H (Beta, V2)
hCoV-19/Reunion/HCL021130481601/2021|EPI_ISL_3205485|2021-07-06	20H	B.1.351.2	B.1.351.2	20H	Beta	20H (Beta, V2)
hCoV-19/Reunion/HCL021130589101/2021|EPI_ISL_3205486|2021-07-06	20H	B.1.351.2	B.1.351.2	20H	Beta	20H (Beta, V2)
hCoV-19/Reunion/HCL021130599301/2021|EPI_ISL_3205491|2021-07-06	20H	B.1.351.2	B.1.351.2	20H	Beta	20H (Beta, V2)
hCoV-19/Reunion/HCL021130607101/2021|EPI_ISL_3205492|2021-07-06	20H	B.1.351.2	B.1.351.2	20H	Beta	20H (Beta, V2)
hCoV-19/Reunion/HCL021130621301/2021|EPI_ISL_3205495|2021-07-06	20H	B.1.351	B.1.351	20H	Beta	20H (Beta, V2)
hCoV-19/Reunion/HCL021131227701/2021|EPI_ISL_3205504|2021-07-06	20H	B.1.351	B.1.351	20H	Beta	20H (Beta, V2)
hCoV-19/South_Africa/NHLS-UCT-GS-D056/2021|EPI_ISL_3207572|2021-07-03	21J	AY.6	B.1.617.2.6	21J	Delta	21J (Delta)
hCoV-19/South_Africa/NHLS-UCT-LA-Z537/2021|EPI_ISL_3207506|2021-07-03	21J	AY.32	B.1.617.2.32	21J	Delta	21J (Delta)
hCoV-19/South_Africa/NHLS-UCT-LA-Z536/2021|EPI_ISL_3207505|2021-07-03	21J	B.1.617.2	B.1.617.2	21J	Delta	21J (Delta)
hCoV-19/South_Africa/NHLS-UCT-LA-Z544/2021|EPI_ISL_3207508|2021-07-05	21J	AY.32	B.1.617.2.32	21J	Delta	21J (Delta)
hCoV-19/South_Africa/NHLS-UCT-GS-D042/2021|EPI_ISL_3207512|2021-07-06	21J	AY.45	B.1.617.2.45	21J	Delta	21J (Delta)
hCoV-19/South_Africa/NHLS-UCT-GS-D025/2021|EPI_ISL_3207547|2021-07-02	21J	AY.32	B.1.617.2.32	21J	Delta	21J (Delta)
hCoV-19/South_Africa/NHLS-UCT-GS-D026/2021|EPI_ISL_3207548|2021-07-02	21I	B.1.617.2	B.1.617.2	21I	Delta	21I (Delta)
hCoV-19/South_Africa/NHLS-UCT-GS-D031/2021|EPI_ISL_3207551|2021-07-02	21J	AY.45	B.1.617.2.45	21J	Delta	21J (Delta)
hCoV-19/South_Africa/NHLS-UCT-GS-D034/2021|EPI_ISL_3207554|2021-07-05	21J	AY.120.2	B.1.617.2.120.2	21J	Delta	21J (Delta)
hCoV-19/South_Africa/NHLS-UCT-GS-D035/2021|EPI_ISL_3207555|2021-07-05	21J	AY.91	B.1.617.2.91	21J	Delta	21J (Delta)
hCoV-19/South_Africa/NHLS-UCT-GS-D037/2021|EPI_ISL_3207557|2021-07-05	21J	AY.45	B.1.617.2.45	21J	Delta	21J (Delta)
hCoV-19/South_Africa/NHLS-UCT-GS-D038/2021|EPI_ISL_3207558|2021-07-05	21J	AY.45	B.1.617.2.45	21J	Delta	21J (Delta)
hCoV-19/South_Africa/NHLS-UCT-GS-D041/2021|EPI_ISL_3207560|2021-07-06	21J	AY.45	B.1.617.2.45	21J	Delta	21J (Delta)
hCoV-19/South_Africa/NHLS-UCT-GS-D043/2021|EPI_ISL_3207561|2021-07-06	21J	AY.45	B.1.617.2.45	21J	Delta	21J (Delta)
hCoV-19/South_Africa/NHLS-UCT-GS-D048/2021|EPI_ISL_3207565|2021-07-08	21J	AY.91	B.1.617.2.91	21J	Delta	21J (Delta)
hCoV-19/South_Africa/NHLS-UCT-GS-D049/2021|EPI_ISL_3207566|2021-07-08	21J	AY.45	B.1.617.2.45	21J	Delta	21J (Delta)
hCoV-19/South_Africa/NHLS-UCT-GS-D051/2021|EPI_ISL_3207568|2021-07-08	21J	AY.45	B.1.617.2.45	21J	Delta	21J (Delta)
hCoV-19/South_Africa/NHLS-UCT-GS-D052/2021|EPI_ISL_3207569|2021-07-08	21J	AY.99	B.1.617.2.99	21J	Delta	21J (Delta)
hCoV-19/South_Africa/NHLS-UCT-LA-Z533/2021|EPI_ISL_3207575|2021-07-05	21J	AY.32	B.1.617.2.32	21J	Delta	21J (Delta)
hCoV-19/South_Africa/NHLS-UCT-LA-Z540/2021|EPI_ISL_3207579|2021-07-05	21J	AY.91	B.1.617.2.91	21J	Delta	21J (Delta)
hCoV-19/South_Africa/NHLS-UCT-LA-Z547/2021|EPI_ISL_3207583|2021-07-05	21J	AY.32	B.1.617.2.32	21J	Delta	21J (Delta)
hCoV-19/South_Africa/NHLS-UCT-LA-Z550/2021|EPI_ISL_3207586|2021-07-05	21J	AY.6	B.1.617.2.6	21J	Delta	21J (Delta)
hCoV-19/South_Africa/NHLS-UCT-LA-Z551/2021|EPI_ISL_3207587|2021-07-05	21J	AY.32	B.1.617.2.32	21J	Delta	21J (Delta)
hCoV-19/Kenya/KEM-CVR-102756/2021|EPI_ISL_4508258|2021-07-05	21A	AY.16	B.1.617.2.16	21A	Delta	21A (Delta)
hCoV-19/Kenya/KEM-CVR-102767/2021|EPI_ISL_4508426|2021-07-05	21I	B.1.617.2	B.1.617.2	21I	Delta	21I (Delta)
hCoV-19/Zambia/ZMB-108701/2021|EPI_ISL_4513640|2021-07-05	21J	AY.116	B.1.617.2.116	21J	Delta	21J (Delta)
hCoV-19/Zambia/ZMB-108703/2021|EPI_ISL_4513641|2021-07-05	21J	AY.116	B.1.617.2.116	21J	Delta	21J (Delta)
hCoV-19/Zambia/ZMB-108704/2021|EPI_ISL_4513642|2021-07-05	21J	AY.116	B.1.617.2.116	21J	Delta	21J (Delta)
hCoV-19/Zambia/ZMB-108711/2021|EPI_ISL_4513645|2021-07-05	21J	AY.116	B.1.617.2.116	21J	Delta	21J (Delta)
hCoV-19/Zambia/ZMB-108721/2021|EPI_ISL_4513648|2021-07-05	21J	AY.116	B.1.617.2.116	21J	Delta	21J (Delta)
hCoV-19/Zambia/ZMB-108728/2021|EPI_ISL_4513652|2021-07-05	21J	AY.116	B.1.617.2.116	21J	Delta	21J (Delta)
hCoV-19/Zambia/ZMB-108732/2021|EPI_ISL_4513655|2021-07-05	21J	AY.116	B.1.617.2.116	21J	Delta	21J (Delta)
hCoV-19/Zambia/ZMB-108733/2021|EPI_ISL_4513656|2021-07-05	21J	AY.116	B.1.617.2.116	21J	Delta	21J (Delta)
hCoV-19/Zambia/ZMB-108761/2021|EPI_ISL_4513660|2021-07-05	21J	AY.116	B.1.617.2.116	21J	Delta	21J (Delta)
hCoV-19/Zambia/ZMB-108835/2021|EPI_ISL_4513664|2021-07-07	21J	AY.116	B.1.617.2.116	21J	Delta	21J (Delta)
hCoV-19/Zambia/ZMB-108836/2021|EPI_ISL_4513665|2021-07-07	21J	AY.116	B.1.617.2.116	21J	Delta	21J (Delta)
hCoV-19/Zambia/ZMB-108838/2021|EPI_ISL_4513667|2021-07-07	21J	B.1.617.2	B.1.617.2	21J	Delta	21J (Delta)
hCoV-19/Zambia/ZMB-108839/2021|EPI_ISL_4513668|2021-07-07	21J	AY.116	B.1.617.2.116	21J	Delta	21J (Delta)
hCoV-19/Zambia/ZMB-108840/2021|EPI_ISL_4513669|2021-07-07	21J	AY.116	B.1.617.2.116	21J	Delta	21J (Delta)
hCoV-19/Zambia/ZMB-108849/2021|EPI_ISL_4513672|2021-07-07	21J	AY.116	B.1.617.2.116	21J	Delta	21J (Delta)
hCoV-19/Zambia/ZMB-109069/2021|EPI_ISL_4513678|2021-07-08	21J	AY.116	B.1.617.2.116	21J	Delta	21J (Delta)
hCoV-19/Zambia/ZMB-109187/2021|EPI_ISL_4513681|2021-07-09	21J	AY.116	B.1.617.2.116	21J	Delta	21J (Delta)
hCoV-19/Zambia/ZMB-109208/2021|EPI_ISL_4513682|2021-07-09	21J	AY.116	B.1.617.2.116	21J	Delta	21J (Delta)
hCoV-19/Zambia/ZMB-115013/2021|EPI_ISL_4513729|2021-07-08	21J	AY.116	B.1.617.2.116	21J	Delta	21J (Delta)
hCoV-19/South_Africa/NICD-N12086/2021|EPI_ISL_3237010|2021-07-03	21J	AY.45	B.1.617.2.45	21J	Delta	21J (Delta)
hCoV-19/South_Africa/NICD-N11097/2021|EPI_ISL_3236935|2021-07-03	21A	AY.19	B.1.617.2.19	21A	Delta	21A (Delta)
hCoV-19/South_Africa/NICD-N11102/2021|EPI_ISL_3236936|2021-07-04	21J	AY.45	B.1.617.2.45	21J	Delta	21J (Delta)
hCoV-19/South_Africa/NICD-N11115/2021|EPI_ISL_3236941|2021-07-03	21J	AY.45	B.1.617.2.45	21J	Delta	21J (Delta)
hCoV-19/South_Africa/NICD-N11116/2021|EPI_ISL_3236942|2021-07-04	21J	AY.45	B.1.617.2.45	21J	Delta	21J (Delta)
hCoV-19/South_Africa/NICD-N11132/2021|EPI_ISL_3236945|2021-07-04	21A	AY.19	B.1.617.2.19	21A	Delta	21A (Delta)
hCoV-19/South_Africa/NICD-N11164/2021|EPI_ISL_3236954|2021-07-03	21J	AY.45	B.1.617.2.45	21J	Delta	21J (Delta)
hCoV-19/South_Africa/NICD-N11175/2021|EPI_ISL_3236956|2021-07-03	21J	AY.45	B.1.617.2.45	21J	Delta	21J (Delta)
hCoV-19/South_Africa/NICD-N11513/2021|EPI_ISL_3236958|2021-07-03	21J	AY.6	B.1.617.2.6	21J	Delta	21J (Delta)
hCoV-19/South_Africa/NICD-N11580/2021|EPI_ISL_3236966|2021-07-08	21J	AY.45	B.1.617.2.45	21J	Delta	21J (Delta)
hCoV-19/South_Africa/NICD-N11591/2021|EPI_ISL_3236971|2021-07-06	21J	AY.99	B.1.617.2.99	21J	Delta	21J (Delta)
hCoV-19/South_Africa/NICD-N11603/2021|EPI_ISL_3236975|2021-07-05	21J	AY.45	B.1.617.2.45	21J	Delta	21J (Delta)
hCoV-19/South_Africa/NICD-N11607/2021|EPI_ISL_3236977|2021-07-05	21J	AY.45	B.1.617.2.45	21J	Delta	21J (Delta)
hCoV-19/South_Africa/NICD-N11628/2021|EPI_ISL_3236980|2021-07-05	21J	AY.99	B.1.617.2.99	21J	Delta	21J (Delta)
hCoV-19/South_Africa/NICD-N11872/2021|EPI_ISL_3236986|2021-07-08	21J	AY.45	B.1.617.2.45	21J	Delta	21J (Delta)
hCoV-19/South_Africa/NICD-N11902/2021|EPI_ISL_3236989|2021-07-11	21J	AY.45	B.1.617.2.45	21J	Delta	21J (Delta)
hCoV-19/South_Africa/NICD-N12068/2021|EPI_ISL_3237004|2021-07-04	21J	AY.120.2	B.1.617.2.120.2	21J	Delta	21J (Delta)
hCoV-19/South_Africa/NICD-N12072/2021|EPI_ISL_3237005|2021-07-04	21J	AY.120.2	B.1.617.2.120.2	21J	Delta	21J (Delta)
hCoV-19/South_Africa/NICD-N12075/2021|EPI_ISL_3237007|2021-07-04	21J	AY.120.2	B.1.617.2.120.2	21J	Delta	21J (Delta)
hCoV-19/South_Africa/NICD-N12141/2021|EPI_ISL_3237024|2021-07-06	21J	AY.45	B.1.617.2.45	21J	Delta	21J (Delta)
hCoV-19/South_Africa/NICD-N12160/2021|EPI_ISL_3237032|2021-07-07	21J	AY.45	B.1.617.2.45	21J	Delta	21J (Delta)
hCoV-19/South_Africa/NICD-N11124/2021|EPI_ISL_3237077|2021-07-03	21J	AY.45	B.1.617.2.45	21J	Delta	21J (Delta)
hCoV-19/South_Africa/NICD-N11083/2021|EPI_ISL_3237052|2021-07-05	21A	AY.19	B.1.617.2.19	21A	Delta	21A (Delta)
hCoV-19/South_Africa/NICD-N11085/2021|EPI_ISL_3237054|2021-07-02	21J	AY.45	B.1.617.2.45	21J	Delta	21J (Delta)
hCoV-19/South_Africa/NICD-N11089/2021|EPI_ISL_3237056|2021-07-04	21J	AY.45	B.1.617.2.45	21J	Delta	21J (Delta)
hCoV-19/South_Africa/NICD-N11100/2021|EPI_ISL_3237062|2021-07-04	21J	AY.45	B.1.617.2.45	21J	Delta	21J (Delta)
hCoV-19/South_Africa/NICD-N11117/2021|EPI_ISL_3237071|2021-07-03	21J	AY.45	B.1.617.2.45	21J	Delta	21J (Delta)
hCoV-19/South_Africa/NICD-N11123/2021|EPI_ISL_3237076|2021-07-03	21J	AY.45	B.1.617.2.45	21J	Delta	21J (Delta)
hCoV-19/South_Africa/NICD-N11128/2021|EPI_ISL_3237080|2021-07-04	21J	AY.45	B.1.617.2.45	21J	Delta	21J (Delta)
hCoV-19/South_Africa/NICD-N11133/2021|EPI_ISL_3237083|2021-07-04	21J	B.1.617.2	B.1.617.2	21J	Delta	21J (Delta)
hCoV-19/South_Africa/NICD-N11136/2021|EPI_ISL_3237085|2021-07-04	21J	AY.45	B.1.617.2.45	21J	Delta	21J (Delta)
hCoV-19/South_Africa/NICD-N11137/2021|EPI_ISL_3237086|2021-07-04	21J	AY.45	B.1.617.2.45	21J	Delta	21J (Delta)
hCoV-19/South_Africa/NICD-N11142/2021|EPI_ISL_3237089|2021-07-03	21A	AY.19	B.1.617.2.19	21A	Delta	21A (Delta)
hCoV-19/South_Africa/NICD-N11158/2021|EPI_ISL_3237099|2021-07-06	21J	AY.122	B.1.617.2.122	21J	Delta	21J (Delta)
hCoV-19/South_Africa/NICD-N11510/2021|EPI_ISL_3237113|2021-07-03	20H	B.1.351	B.1.351	20H	Beta	20H (Beta, V2)
hCoV-19/South_Africa/NICD-N11569/2021|EPI_ISL_3237120|2021-07-09	21I	B.1.617.2	B.1.617.2	21I	Delta	21I (Delta)
hCoV-19/South_Africa/NICD-N11593/2021|EPI_ISL_3237129|2021-07-05	21J	AY.99	B.1.617.2.99	21J	Delta	21J (Delta)
hCoV-19/South_Africa/NICD-N11624/2021|EPI_ISL_3237147|2021-07-05	21J	AY.99	B.1.617.2.99	21J	Delta	21J (Delta)
hCoV-19/South_Africa/NICD-N11629/2021|EPI_ISL_3237149|2021-07-05	21J	AY.99	B.1.617.2.99	21J	Delta	21J (Delta)
hCoV-19/South_Africa/NICD-N11871/2021|EPI_ISL_3237158|2021-07-09	21J	AY.45	B.1.617.2.45	21J	Delta	21J (Delta)
hCoV-19/South_Africa/NICD-N11878/2021|EPI_ISL_3237160|2021-07-08	21J	AY.45	B.1.617.2.45	21J	Delta	21J (Delta)
hCoV-19/South_Africa/NICD-N11879/2021|EPI_ISL_3237161|2021-07-08	21J	AY.45	B.1.617.2.45	21J	Delta	21J (Delta)
hCoV-19/South_Africa/NICD-N11901/2021|EPI_ISL_3237167|2021-07-11	21J	AY.45	B.1.617.2.45	21J	Delta	21J (Delta)
hCoV-19/South_Africa/NICD-N11905/2021|EPI_ISL_3237169|2021-07-11	21J	AY.99	B.1.617.2.99	21J	Delta	21J (Delta)
hCoV-19/South_Africa/NICD-N12073/2021|EPI_ISL_3237200|2021-07-04	21J	AY.120.2	B.1.617.2.120.2	21J	Delta	21J (Delta)
hCoV-19/South_Africa/NICD-N12076/2021|EPI_ISL_3237201|2021-07-04	21J	AY.120.2	B.1.617.2.120.2	21J	Delta	21J (Delta)
hCoV-19/South_Africa/NICD-N12080/2021|EPI_ISL_3237203|2021-07-02	21J	AY.45	B.1.617.2.45	21J	Delta	21J (Delta)
hCoV-19/South_Africa/NICD-N12087/2021|EPI_ISL_3237207|2021-07-03	21J	AY.45	B.1.617.2.45	21J	Delta	21J (Delta)
hCoV-19/South_Africa/NICD-N12133/2021|EPI_ISL_3237220|2021-07-08	21J	AY.45	B.1.617.2.45	21J	Delta	21J (Delta)
hCoV-19/South_Africa/NICD-N12142/2021|EPI_ISL_3237224|2021-07-06	21J	AY.45	B.1.617.2.45	21J	Delta	21J (Delta)
hCoV-19/South_Africa/NICD-N12145/2021|EPI_ISL_3237225|2021-07-09	21J	AY.45	B.1.617.2.45	21J	Delta	21J (Delta)
hCoV-19/South_Africa/NICD-N12147/2021|EPI_ISL_3237226|2021-07-09	21J	AY.45	B.1.617.2.45	21J	Delta	21J (Delta)
hCoV-19/Kenya/KEM_CVR_102871/2021|EPI_ISL_4515254|2021-07-08	21A	AY.16	B.1.617.2.16	21A	Delta	21A (Delta)
hCoV-19/Kenya/KEM_CVR_102877/2021|EPI_ISL_4515337|2021-07-08	21A	AY.16	B.1.617.2.16	21A	Delta	21A (Delta)
hCoV-19/Kenya/KEM_CVR_102908/2021|EPI_ISL_4515339|2021-07-08	21A	AY.16	B.1.617.2.16	21A	Delta	21A (Delta)
hCoV-19/Kenya/KEM_CVR_102737/2021|EPI_ISL_4515537|2021-07-02	21A	B.1.617.2	B.1.617.2	21A	Delta	21A (Delta)
hCoV-19/South_Africa/KRISP-K020317/2021|EPI_ISL_3261925|2021-07-03	21J	AY.45	B.1.617.2.45	21J	Delta	21J (Delta)
hCoV-19/South_Africa/KRISP-K020335/2021|EPI_ISL_3261939|2021-07-05	21I	AY.38	B.1.617.2.38	21I	Delta	21I (Delta)
hCoV-19/South_Africa/KRISP-K020340/2021|EPI_ISL_3261944|2021-07-08	21J	AY.45	B.1.617.2.45	21J	Delta	21J (Delta)
hCoV-19/South_Africa/KRISP-K020320/2021|EPI_ISL_3261928|2021-07-04	21J	AY.45	B.1.617.2.45	21J	Delta	21J (Delta)
hCoV-19/South_Africa/CERI-KRISP-K020099/2021|EPI_ISL_3267722|2021-07-06	21J	AY.120.2	B.1.617.2.120.2	21J	Delta	21J (Delta)
hCoV-19/South_Africa/CERI-KRISP-K020100/2021|EPI_ISL_3267723|2021-07-05	21J	AY.120.2	B.1.617.2.120.2	21J	Delta	21J (Delta)
hCoV-19/South_Africa/CERI-KRISP-K020103/2021|EPI_ISL_3267724|2021-07-02	21J	AY.45	B.1.617.2.45	21J	Delta	21J (Delta)
hCoV-19/South_Africa/CERI-KRISP-K020123/2021|EPI_ISL_3267741|2021-07-03	21J	AY.120.2	B.1.617.2.120.2	21J	Delta	21J (Delta)
hCoV-19/Morocco/FMP321-90/2021|EPI_ISL_4572229|2021-07-10	21J	AY.33	B.1.617.2.33	21J	Delta	21J (Delta)
hCoV-19/Angola/CERI-KRISP-K023599/2021|EPI_ISL_4575015|2021-07-04	21J	AY.5.1	B.1.617.2.5.1	21J	Delta	21J (Delta)
hCoV-19/Angola/CERI-KRISP-K023600/2021|EPI_ISL_4575016|2021-07-04	21I	AY.38	B.1.617.2.38	21I	Delta	21I (Delta)
hCoV-19/Angola/CERI-KRISP-K023601/2021|EPI_ISL_4575017|2021-07-04	21J	AY.5	B.1.617.2.5	21J	Delta	21J (Delta)
hCoV-19/Angola/CERI-KRISP-K023649/2021|EPI_ISL_4575059|2021-07-11	21J	AY.91	B.1.617.2.91	21J	Delta	21J (Delta)
hCoV-19/Angola/CERI-KRISP-K023610/2021|EPI_ISL_4575065|2021-07-02	20H	B.1.351	B.1.351	20H	Beta	20H (Beta, V2)
hCoV-19/Angola/CERI-KRISP-K023613/2021|EPI_ISL_4575117|2021-07-06	20I	B.1.1.7	B.1.1.7	20I	Alpha	20I (Alpha, V1)
hCoV-19/Reunion/HCL021125590301/2021|EPI_ISL_3130371|2021-07-06	20H	B.1.351	B.1.351	20H	Beta	20H (Beta, V2)
hCoV-19/South_Africa/VIDA-KRISP-K020008/2021|EPI_ISL_3447854|2021-07-02	20H	B.1.351	B.1.351	20H	Beta	20H (Beta, V2)
hCoV-19/Reunion/HCL021131208401/2021|EPI_ISL_3205501|2021-07-06	20H	B.1.351.2	B.1.351.2	20H	Beta	20H (Beta, V2)
hCoV-19/South_Africa/NICD-N11855/2021|EPI_ISL_3411575|2021-07-05	21J	AY.45	B.1.617.2.45	21J	Delta	21J (Delta)
hCoV-19/South_Africa/NICD-N13012/2021|EPI_ISL_3411698|2021-07-10	21J	AY.45	B.1.617.2.45	21J	Delta	21J (Delta)
hCoV-19/South_Africa/NICD-N12711/2021|EPI_ISL_3451271|2021-07-08	21J	AY.45	B.1.617.2.45	21J	Delta	21J (Delta)
hCoV-19/Eswatini/N13392/2021|EPI_ISL_4301782|2021-07-03	21J	AY.45	B.1.617.2.45	21J	Delta	21J (Delta)
hCoV-19/Eswatini/N13448/2021|EPI_ISL_4301831|2021-07-07	21J	AY.45	B.1.617.2.45	21J	Delta	21J (Delta)
hCoV-19/South_Africa/NICD-N12704/2021|EPI_ISL_3451264|2021-07-06	21J	AY.45	B.1.617.2.45	21J	Delta	21J (Delta)
hCoV-19/South_Africa/NICD-N12719/2021|EPI_ISL_3451279|2021-07-07	20H	B.1.351	B.1.351	20H	Beta	20H (Beta, V2)
hCoV-19/South_Africa/NICD-N13039/2021|EPI_ISL_3451351|2021-07-07	21J	AY.45	B.1.617.2.45	21J	Delta	21J (Delta)
hCoV-19/South_Africa/NICD-N11633/2021|EPI_ISL_3838269|2021-07-05	21J	AY.99	B.1.617.2.99	21J	Delta	21J (Delta)
hCoV-19/South_Africa/NICD-N11743/2021|EPI_ISL_3838304|2021-07-07	21J	AY.45	B.1.617.2.45	21J	Delta	21J (Delta)
hCoV-19/South_Africa/NICD-N11770/2021|EPI_ISL_3838326|2021-07-11	21J	AY.45	B.1.617.2.45	21J	Delta	21J (Delta)
hCoV-19/South_Africa/NICD-N11774/2021|EPI_ISL_3838330|2021-07-10	21J	AY.45	B.1.617.2.45	21J	Delta	21J (Delta)
hCoV-19/South_Africa/NICD-N12114/2021|EPI_ISL_3838383|2021-07-09	21J	AY.45	B.1.617.2.45	21J	Delta	21J (Delta)
hCoV-19/South_Africa/NICD-N12118/2021|EPI_ISL_3838387|2021-07-09	21J	AY.120.2	B.1.617.2.120.2	21J	Delta	21J (Delta)
hCoV-19/South_Africa/NICD-N12180/2021|EPI_ISL_3838405|2021-07-07	21J	AY.45	B.1.617.2.45	21J	Delta	21J (Delta)
hCoV-19/South_Africa/NICD-N11125/2021|EPI_ISL_3237078|2021-07-04	21J	AY.45	B.1.617.2.45	21J	Delta	21J (Delta)
hCoV-19/South_Africa/NICD-N11507/2021|EPI_ISL_3237110|2021-07-04	21J	AY.32	B.1.617.2.32	21J	Delta	21J (Delta)
hCoV-19/South_Africa/NICD-N12766/2021|EPI_ISL_3342236|2021-07-10	21J	AY.45	B.1.617.2.45	21J	Delta	21J (Delta)
hCoV-19/South_Africa/NICD-N11201/2021|EPI_ISL_3101506|2021-07-03	21J	B.1.617.2	B.1.617.2	21J	Delta	21J (Delta)
hCoV-19/South_Africa/NICD-N11243/2021|EPI_ISL_3101537|2021-07-02	21J	AY.45	B.1.617.2.45	21J	Delta	21J (Delta)
hCoV-19/South_Africa/NICD-N11308/2021|EPI_ISL_3101664|2021-07-08	21J	AY.45	B.1.617.2.45	21J	Delta	21J (Delta)
hCoV-19/South_Africa/NICD-R10162/2021|EPI_ISL_4029953|2021-07-06	21J	AY.45	B.1.617.2.45	21J	Delta	21J (Delta)
hCoV-19/Namibia/CERI-KRISP-K022541/2021|EPI_ISL_5327921|2021-07-09	21J	AY.91	B.1.617.2.91	21J	Delta	21J (Delta)
hCoV-19/Namibia/CERI-KRISP-K022543/2021|EPI_ISL_5327923|2021-07-09	21J	AY.91	B.1.617.2.91	21J	Delta	21J (Delta)
hCoV-19/Angola/CERI-KRISP-K021670/2021|EPI_ISL_3730486|2021-07-06	21J	AY.91	B.1.617.2.91	21J	Delta	21J (Delta)
hCoV-19/Benin/458942/2021|EPI_ISL_4566926|2021-07-05	21J	AY.122	B.1.617.2.122	21J	Delta	21J (Delta)
hCoV-19/South_Africa/KRISP-K020739/2021|EPI_ISL_3447873|2021-07-11	21J	AY.45	B.1.617.2.45	21J	Delta	21J (Delta)
hCoV-19/Zambia/ZMB-107970/2021|EPI_ISL_4513625|2021-07-04	20B	B.1.1.214	B.1.1.214	20B	unassigned	20B
hCoV-19/South_Africa/NICD-N14107/2021|EPI_ISL_4652215|2021-07-10	21J	AY.122	B.1.617.2.122	21J	Delta	21J (Delta)
hCoV-19/South_Africa/NICD-N14120/2021|EPI_ISL_4652270|2021-07-05	21J	AY.32	B.1.617.2.32	21J	Delta	21J (Delta)
hCoV-19/South_Africa/NICD-N14473/2021|EPI_ISL_4651083|2021-07-10	21J	AY.45	B.1.617.2.45	21J	Delta	21J (Delta)
hCoV-19/South_Africa/NICD-N14469/2021|EPI_ISL_4652186|2021-07-10	21J	AY.45	B.1.617.2.45	21J	Delta	21J (Delta)
hCoV-19/South_Africa/NICD-N14110/2021|EPI_ISL_4652231|2021-07-02	21J	AY.45	B.1.617.2.45	21J	Delta	21J (Delta)
hCoV-19/South_Africa/NICD-N14111/2021|EPI_ISL_4652237|2021-07-10	21J	AY.45	B.1.617.2.45	21J	Delta	21J (Delta)
hCoV-19/South_Africa/NICD-N14114/2021|EPI_ISL_4652248|2021-07-07	21J	AY.122	B.1.617.2.122	21J	Delta	21J (Delta)
hCoV-19/Rwanda/CV2240/2021|EPI_ISL_4768074|2021-07-07	21A	B.1.617.2	B.1.617.2	21A	Delta	21A (Delta)
hCoV-19/Rwanda/CV2242/2021|EPI_ISL_4768103|2021-07-06	21A	B.1.617.2	B.1.617.2	21A	Delta	21A (Delta)
hCoV-19/Rwanda/CV2238/2021|EPI_ISL_4768105|2021-07-07	20H	B.1.351	B.1.351	20H	Beta	20H (Beta, V2)
hCoV-19/Rwanda/CV2246/2021|EPI_ISL_4768131|2021-07-06	21A	B.1.617.2	B.1.617.2	21A	Delta	21A (Delta)
hCoV-19/Rwanda/CV2237/2021|EPI_ISL_4768053|2021-07-07	21A	B.1.617.2	B.1.617.2	21A	Delta	21A (Delta)
hCoV-19/Rwanda/CV2252/2021|EPI_ISL_4768057|2021-07-07	21J	AY.46	B.1.617.2.46	21J	Delta	21J (Delta)
hCoV-19/Rwanda/CV2239/2021|EPI_ISL_4768069|2021-07-07	21I	AY.55	B.1.617.2.55	21I	Delta	21I (Delta)
hCoV-19/Rwanda/CV2232/2021|EPI_ISL_4768070|2021-07-06	21A	B.1.617.2	B.1.617.2	21A	Delta	21A (Delta)
hCoV-19/Rwanda/CV2251/2021|EPI_ISL_4768072|2021-07-05	20H	B.1.351	B.1.351	20H	Beta	20H (Beta, V2)
hCoV-19/Rwanda/CV2233/2021|EPI_ISL_4768075|2021-07-06	21A	B.1.617.2	B.1.617.2	21A	Delta	21A (Delta)
hCoV-19/Rwanda/CV2234/2021|EPI_ISL_4768076|2021-07-06	21A	B.1.617.2	B.1.617.2	21A	Delta	21A (Delta)
hCoV-19/Rwanda/CV2236/2021|EPI_ISL_4768078|2021-07-06	21A	B.1.617.2	B.1.617.2	21A	Delta	21A (Delta)
hCoV-19/Rwanda/CV2231/2021|EPI_ISL_4768099|2021-07-06	20H	B.1.351	B.1.351	20H	Beta	20H (Beta, V2)
hCoV-19/Rwanda/CV2229/2021|EPI_ISL_4768117|2021-07-05	21A	B.1.617.2	B.1.617.2	21A	Delta	21A (Delta)
hCoV-19/South_Africa/NHLS-UCT-GS-D429/2021|EPI_ISL_4817064|2021-07-07	21J	AY.45	B.1.617.2.45	21J	Delta	21J (Delta)
hCoV-19/South_Africa/NHLS-UCT-GS-D366/2021|EPI_ISL_4817061|2021-07-05	21J	AY.91	B.1.617.2.91	21J	Delta	21J (Delta)
hCoV-19/South_Africa/NICD-N12597/2021|EPI_ISL_3342214|2021-07-08	21J	AY.99	B.1.617.2.99	21J	Delta	21J (Delta)
hCoV-19/South_Africa/NICD-N12782/2021|EPI_ISL_3342248|2021-07-09	21J	AY.45	B.1.617.2.45	21J	Delta	21J (Delta)
hCoV-19/South_Africa/NICD-N12789/2021|EPI_ISL_3342253|2021-07-09	21J	AY.45	B.1.617.2.45	21J	Delta	21J (Delta)
hCoV-19/South_Africa/NICD-N12594/2021|EPI_ISL_3342212|2021-07-08	21J	AY.99	B.1.617.2.99	21J	Delta	21J (Delta)
hCoV-19/South_Africa/NICD-N12600/2021|EPI_ISL_3342217|2021-07-09	21J	AY.45	B.1.617.2.45	21J	Delta	21J (Delta)
hCoV-19/Reunion/CHU798000073145/2021|EPI_ISL_6779360|2021-07-05	20H	B.1.351.2	B.1.351.2	20H	Beta	20H (Beta, V2)
hCoV-19/Reunion/CHU7210708616/2021|EPI_ISL_6779365|2021-07-06	20H	B.1.351.2	B.1.351.2	20H	Beta	20H (Beta, V2)
hCoV-19/Reunion/CHU7210712808/2021|EPI_ISL_6778897|2021-07-09	21A	AY.53	B.1.617.2.53	21A	Delta	21A (Delta)
hCoV-19/Reunion/CHU7210721279/2021|EPI_ISL_6779335|2021-07-09	20H	B.1.351.2	B.1.351.2	20H	Beta	20H (Beta, V2)
hCoV-19/Reunion/CHU7210712770/2021|EPI_ISL_6779355|2021-07-05	20H	B.1.351.2	B.1.351.2	20H	Beta	20H (Beta, V2)
hCoV-19/South_Africa/NICD-R09980/2021|EPI_ISL_4891850|2021-07-05	21J	AY.45	B.1.617.2.45	21J	Delta	21J (Delta)
hCoV-19/Liberia/LIB-0084/2021|EPI_ISL_3547689|2021-07-09	21I	AY.37	B.1.617.2.37	21I	Delta	21I (Delta)
hCoV-19/Rwanda/CV2247/2021|EPI_ISL_4768113|2021-07-06	21A	B.1.617.2	B.1.617.2	21A	Delta	21A (Delta)
hCoV-19/Rwanda/CV2243/2021|EPI_ISL_4768123|2021-07-06	21A	B.1.617.2	B.1.617.2	21A	Delta	21A (Delta)
hCoV-19/Guinea/CERFIG-25579/2021|EPI_ISL_4205870|2021-07-07	21D	B.1.525	B.1.525	21D	Eta	21D (Eta)
hCoV-19/South_Africa/NICD-N11162/2021|EPI_ISL_3237100|2021-07-04	20D	C.1.2	B.1.1.1.1.2	20D	unassigned	20D
hCoV-19/Algeria/17416/2021|EPI_ISL_5052205|2021-07-08	20I	Q.7	B.1.1.7.7	20I	Alpha	20I (Alpha, V1)
hCoV-19/South_Africa/NICD-N11301/2021|EPI_ISL_3149306|2021-07-05	20D	C.1.2	B.1.1.1.1.2	20D	unassigned	20D
hCoV-19/South_Africa/NICD-N12765/2021|EPI_ISL_3342235|2021-07-09	21J	AY.45	B.1.617.2.45	21J	Delta	21J (Delta)
hCoV-19/Botswana/R21B83_BHP_AAB78334/2021|EPI_ISL_2868412|2021-07-02	20H	B.1.351	B.1.351	20H	Beta	20H (Beta, V2)
hCoV-19/South_Africa/Tygerberg_1303/2021|EPI_ISL_3032512|2021-07-09	20B	B.1.1.528	B.1.1.528	20B	unassigned	20B
hCoV-19/South_Africa/NICD-N11542/2021|EPI_ISL_3411563|2021-07-02	21J	AY.45	B.1.617.2.45	21J	Delta	21J (Delta)
hCoV-19/South_Africa/NICD-N11544/2021|EPI_ISL_3411565|2021-07-02	21J	AY.45	B.1.617.2.45	21J	Delta	21J (Delta)
hCoV-19/South_Africa/NICD-N11545/2021|EPI_ISL_3411566|2021-07-02	21J	AY.45	B.1.617.2.45	21J	Delta	21J (Delta)
hCoV-19/South_Africa/NICD-N11548/2021|EPI_ISL_3411569|2021-07-02	21J	AY.45	B.1.617.2.45	21J	Delta	21J (Delta)
hCoV-19/South_Africa/NICD-N12968/2021|EPI_ISL_3411654|2021-07-02	21J	AY.120.2	B.1.617.2.120.2	21J	Delta	21J (Delta)
hCoV-19/South_Africa/NICD-N13130/2021|EPI_ISL_3411706|2021-07-09	21J	AY.45	B.1.617.2.45	21J	Delta	21J (Delta)
hCoV-19/South_Africa/NICD-N13132/2021|EPI_ISL_3411708|2021-07-09	21J	AY.99	B.1.617.2.99	21J	Delta	21J (Delta)
hCoV-19/South_Africa/NICD-N13134/2021|EPI_ISL_3411709|2021-07-10	21J	AY.45	B.1.617.2.45	21J	Delta	21J (Delta)
hCoV-19/South_Africa/NICD-R10269/2021|EPI_ISL_4030021|2021-07-08	20D	C.1.2	B.1.1.1.1.2	20D	unassigned	20D
hCoV-19/Eswatini/N13438/2021|EPI_ISL_4301822|2021-07-08	20D	C.1.2	B.1.1.1.1.2	20D	unassigned	20D
hCoV-19/South_Africa/KRISP-K020602/2021|EPI_ISL_3447709|2021-07-08	21J	AY.45	B.1.617.2.45	21J	Delta	21J (Delta)
hCoV-19/South_Africa/KRISP-K020731/2021|EPI_ISL_3447872|2021-07-11	21A	AY.19	B.1.617.2.19	21A	Delta	21A (Delta)
hCoV-19/South_Africa/KRISP-K020745/2021|EPI_ISL_3447877|2021-07-11	21J	AY.45	B.1.617.2.45	21J	Delta	21J (Delta)
hCoV-19/South_Africa/KRISP-K020748/2021|EPI_ISL_3447879|2021-07-10	21J	AY.45	B.1.617.2.45	21J	Delta	21J (Delta)
hCoV-19/South_Africa/KRISP-K020746/2021|EPI_ISL_3447878|2021-07-11	21J	AY.120.2	B.1.617.2.120.2	21J	Delta	21J (Delta)
hCoV-19/South_Africa/KRISP-K020751/2021|EPI_ISL_3447880|2021-07-11	21J	AY.45	B.1.617.2.45	21J	Delta	21J (Delta)
hCoV-19/South_Africa/KRISP-K020291/2021|EPI_ISL_3447707|2021-07-07	21J	AY.45	B.1.617.2.45	21J	Delta	21J (Delta)
hCoV-19/South_Africa/KRISP-K020215/2021|EPI_ISL_3447712|2021-07-08	20H	B.1.351	B.1.351	20H	Beta	20H (Beta, V2)
hCoV-19/South_Africa/KRISP-K020285/2021|EPI_ISL_3447715|2021-07-09	20H	B.1.351	B.1.351	20H	Beta	20H (Beta, V2)
hCoV-19/South_Africa/KRISP-K020741/2021|EPI_ISL_3447875|2021-07-11	21J	AY.122	B.1.617.2.122	21J	Delta	21J (Delta)
hCoV-19/South_Africa/NICD-N11962/2021|EPI_ISL_3451100|2021-07-09	21J	AY.99	B.1.617.2.99	21J	Delta	21J (Delta)
hCoV-19/South_Africa/NICD-N12002/2021|EPI_ISL_3451139|2021-07-10	21J	AY.45	B.1.617.2.45	21J	Delta	21J (Delta)
hCoV-19/South_Africa/NICD-N12027/2021|EPI_ISL_3451143|2021-07-09	21J	AY.45	B.1.617.2.45	21J	Delta	21J (Delta)
hCoV-19/South_Africa/NICD-N12064/2021|EPI_ISL_3451180|2021-07-02	21J	AY.120.2	B.1.617.2.120.2	21J	Delta	21J (Delta)
hCoV-19/South_Africa/NICD-N12717/2021|EPI_ISL_3451277|2021-07-08	21J	AY.45	B.1.617.2.45	21J	Delta	21J (Delta)
hCoV-19/South_Africa/NICD-N12026/2021|EPI_ISL_3451142|2021-07-10	21J	AY.45	B.1.617.2.45	21J	Delta	21J (Delta)
hCoV-19/South_Africa/NICD-N12032/2021|EPI_ISL_3451148|2021-07-10	21J	AY.45	B.1.617.2.45	21J	Delta	21J (Delta)
hCoV-19/South_Africa/NICD-N12714/2021|EPI_ISL_3451274|2021-07-10	20H	B.1.351	B.1.351	20H	Beta	20H (Beta, V2)
hCoV-19/South_Africa/NICD-N12715/2021|EPI_ISL_3451275|2021-07-08	21A	AY.19	B.1.617.2.19	21A	Delta	21A (Delta)
hCoV-19/South_Africa/NICD-N12718/2021|EPI_ISL_3451278|2021-07-08	21J	AY.45	B.1.617.2.45	21J	Delta	21J (Delta)
hCoV-19/South_Africa/NICD-N13018/2021|EPI_ISL_3451332|2021-07-08	21J	AY.45	B.1.617.2.45	21J	Delta	21J (Delta)
hCoV-19/South_Africa/NICD-N13019/2021|EPI_ISL_3451333|2021-07-09	21J	AY.45	B.1.617.2.45	21J	Delta	21J (Delta)
hCoV-19/South_Africa/NICD-N13339/2021|EPI_ISL_3451419|2021-07-08	21J	AY.120.2	B.1.617.2.120.2	21J	Delta	21J (Delta)
hCoV-19/Morocco/RA112-3C/2021|EPI_ISL_3244531|2021-07-06	19A	B	B	19A	unassigned	19A
hCoV-19/South_Africa/NICD-N11998/2021|EPI_ISL_3451135|2021-07-11	21J	AY.95	B.1.617.2.95	21J	Delta	21J (Delta)
hCoV-19/South_Africa/NICD-N12695/2021|EPI_ISL_3451256|2021-07-10	21J	AY.45	B.1.617.2.45	21J	Delta	21J (Delta)
hCoV-19/South_Africa/NICD-N12699/2021|EPI_ISL_3451259|2021-07-06	20I	B.1.1.7	B.1.1.7	20I	Alpha	20I (Alpha, V1)
hCoV-19/South_Africa/NICD-N12708/2021|EPI_ISL_3451268|2021-07-07	21B	B.1.617.1	B.1.617.1	21B	Kappa	21B (Kappa)
hCoV-19/South_Africa/NICD-N12712/2021|EPI_ISL_3451272|2021-07-07	21J	AY.45	B.1.617.2.45	21J	Delta	21J (Delta)
hCoV-19/South_Africa/NICD-N13017/2021|EPI_ISL_3451331|2021-07-09	21J	AY.120.2	B.1.617.2.120.2	21J	Delta	21J (Delta)
hCoV-19/South_Africa/NICD-N13026/2021|EPI_ISL_3451340|2021-07-09	21J	AY.120.2	B.1.617.2.120.2	21J	Delta	21J (Delta)
hCoV-19/South_Africa/NICD-N13034/2021|EPI_ISL_3451348|2021-07-07	21J	AY.45	B.1.617.2.45	21J	Delta	21J (Delta)
hCoV-19/South_Africa/NICD-N11267/2021|EPI_ISL_3074033|2021-07-02	20D	C.1.2	B.1.1.1.1.2	20D	unassigned	20D
hCoV-19/Gambia/48861/2021|EPI_ISL_3150937|2021-07-09	21I	B.1.617.2	B.1.617.2	21I	Delta	21I (Delta)
hCoV-19/South_Africa/NHLS-UCT-GS-D664/2021|EPI_ISL_3506506|2021-07-10	21J	AY.32	B.1.617.2.32	21J	Delta	21J (Delta)
hCoV-19/South_Africa/NHLS-UCT-GS-D598/2021|EPI_ISL_3506504|2021-07-09	21J	AY.32	B.1.617.2.32	21J	Delta	21J (Delta)
hCoV-19/South_Africa/NICD-N11163/2021|EPI_ISL_3236953|2021-07-03	20D	C.1.2	B.1.1.1.1.2	20D	unassigned	20D
hCoV-19/South_Africa/NICD-N12701/2021|EPI_ISL_3451261|2021-07-08	20B	B.1.1.528	B.1.1.528	20B	unassigned	20B
hCoV-19/Uganda/UG674/2021|EPI_ISL_3546300|2021-07-10	21J	AY.46	B.1.617.2.46	21J	Delta	21J (Delta)
hCoV-19/South_Sudan/UG711/2021|EPI_ISL_3546348|2021-07-06	21J	AY.46	B.1.617.2.46	21J	Delta	21J (Delta)
hCoV-19/South_Africa/NHLS-UCT-AM-Z063/2021|EPI_ISL_3690564|2021-07-02	20B	B.1.1.528	B.1.1.528	20B	unassigned	20B
hCoV-19/Reunion/CHU7210707252/2021|EPI_ISL_6779108|2021-07-07	20H	B.1.351.2	B.1.351.2	20H	Beta	20H (Beta, V2)
hCoV-19/Reunion/CHU7210712800/2021|EPI_ISL_6778896|2021-07-09	21A	AY.53	B.1.617.2.53	21A	Delta	21A (Delta)
hCoV-19/Reunion/CHU7210712794/2021|EPI_ISL_6778899|2021-07-08	21A	AY.53	B.1.617.2.53	21A	Delta	21A (Delta)
hCoV-19/Reunion/CHU7210707234/2021|EPI_ISL_6778901|2021-07-05	21A	AY.53	B.1.617.2.53	21A	Delta	21A (Delta)
hCoV-19/Reunion/CHU7210721362/2021|EPI_ISL_6779244|2021-07-09	20H	B.1.351.2	B.1.351.2	20H	Beta	20H (Beta, V2)
hCoV-19/Reunion/CHU5210708554/2021|EPI_ISL_6779345|2021-07-08	20H	B.1.351.2	B.1.351.2	20H	Beta	20H (Beta, V2)
hCoV-19/Reunion/CHU798000073220/2021|EPI_ISL_6779359|2021-07-05	20H	B.1.351.2	B.1.351.2	20H	Beta	20H (Beta, V2)
hCoV-19/Reunion/CHU7210708610/2021|EPI_ISL_6779366|2021-07-06	20H	B.1.351.2	B.1.351.2	20H	Beta	20H (Beta, V2)
hCoV-19/Reunion/CHU7210713466/2021|EPI_ISL_6778895|2021-07-10	21A	AY.40	B.1.617.2.40	21A	Delta	21A (Delta)
hCoV-19/Tunisia/E-5228/2021|EPI_ISL_10141391|2021-07-07	21J	AY.122	B.1.617.2.122	21J	Delta	21J (Delta)
hCoV-19/Tunisia/S-0829/2021|EPI_ISL_10141396|2021-07-02	21J	AY.122	B.1.617.2.122	21J	Delta	21J (Delta)
hCoV-19/South_Africa/NHLS-UCT-GS-D687/2021|EPI_ISL_10239038|2021-07-11	21J	AY.32	B.1.617.2.32	21J	Delta	21J (Delta)
hCoV-19/Kenya/SLM396-07-21/2021|EPI_ISL_10435765|2021-07-04	21A	AY.16	B.1.617.2.16	21A	Delta	21A (Delta)
hCoV-19/Kenya/SLM-397-07-21/2021|EPI_ISL_10435766|2021-07-04	21A	AY.16	B.1.617.2.16	21A	Delta	21A (Delta)
hCoV-19/Kenya/AFI-LAM-326/2021|EPI_ISL_10435806|2021-07-09	21A	B.1.617.2	B.1.617.2	21A	Delta	21A (Delta)
hCoV-19/Kenya/AFI-ISB-357/2021|EPI_ISL_10435915|2021-07-06	21I	B.1.617.2	B.1.617.2	21I	Delta	21I (Delta)
hCoV-19/Kenya/AGKH-1135817/2021|EPI_ISL_10436022|2021-07-02	21A	AY.16	B.1.617.2.16	21A	Delta	21A (Delta)
hCoV-19/Kenya/AGKH-1136645/2021|EPI_ISL_10436024|2021-07-04	21A	AY.16	B.1.617.2.16	21A	Delta	21A (Delta)
hCoV-19/Kenya/AGKH-1136820/2021|EPI_ISL_10436026|2021-07-04	21A	AY.16	B.1.617.2.16	21A	Delta	21A (Delta)
hCoV-19/Kenya/AGKH-1137206/2021|EPI_ISL_10436028|2021-07-05	21J	AY.46	B.1.617.2.46	21J	Delta	21J (Delta)
hCoV-19/Kenya/AGKH-1137223/2021|EPI_ISL_10436029|2021-07-05	21A	AY.16	B.1.617.2.16	21A	Delta	21A (Delta)
hCoV-19/Kenya/AGKH-1138192/2021|EPI_ISL_10436031|2021-07-07	21I	B.1.617.2	B.1.617.2	21I	Delta	21I (Delta)
hCoV-19/South_Africa/SU-NHLS_4109/2021|EPI_ISL_10445629|2021-07-05	21I	AY.38	B.1.617.2.38	21I	Delta	21I (Delta)
hCoV-19/South_Africa/SU-NHLS_4110/2021|EPI_ISL_10445630|2021-07-05	21J	AY.6	B.1.617.2.6	21J	Delta	21J (Delta)
hCoV-19/South_Africa/SU-NHLS_4115/2021|EPI_ISL_10445635|2021-07-06	21J	AY.99	B.1.617.2.99	21J	Delta	21J (Delta)
hCoV-19/South_Africa/SU-NHLS_4148/2021|EPI_ISL_10445666|2021-07-08	21I	AY.38	B.1.617.2.38	21I	Delta	21I (Delta)
hCoV-19/South_Africa/SU-NHLS_4150/2021|EPI_ISL_10445668|2021-07-07	21I	AY.38	B.1.617.2.38	21I	Delta	21I (Delta)
hCoV-19/South_Sudan/UG1115/2021|EPI_ISL_10512570|2021-07-02	21J	AY.6	B.1.617.2.6	21J	Delta	21J (Delta)
hCoV-19/South_Africa/1055364/2021|EPI_ISL_10716929|2021-07-08	21I	B.1.617.2	B.1.617.2	21I	Delta	21I (Delta)
hCoV-19/South_Africa/1054831/2021|EPI_ISL_10716931|2021-07-08	20I	B.1.1.7	B.1.1.7	20I	Alpha	20I (Alpha, V1)
hCoV-19/South_Africa/UW21070812565/2021|EPI_ISL_10724047|2021-07-08	21I	AY.38	B.1.617.2.38	21I	Delta	21I (Delta)
hCoV-19/South_Africa/NHLS-UCT-GS-AZ74/2021|EPI_ISL_10815289|2021-07-06	21I	B.1.617.2	B.1.617.2	21I	Delta	21I (Delta)
hCoV-19/Tunisia/47038/2021|EPI_ISL_10863118|2021-07-08	21J	AY.122	B.1.617.2.122	21J	Delta	21J (Delta)
hCoV-19/South_Africa/SU-NHLS_4184/2021|EPI_ISL_10932671|2021-07-08	21J	AY.32	B.1.617.2.32	21J	Delta	21J (Delta)
hCoV-19/Nigeria/CV4719/2021|EPI_ISL_11246915|2021-07-10	21J	AY.36	B.1.617.2.36	21J	Delta	21J (Delta)
hCoV-19/Nigeria/CV4720/2021|EPI_ISL_11246916|2021-07-10	21J	AY.36	B.1.617.2.36	21J	Delta	21J (Delta)
hCoV-19/South_Africa/NHLS-UCT-GS-AZ73/2021|EPI_ISL_11265086|2021-07-05	21I	B.1.617.2	B.1.617.2	21I	Delta	21I (Delta)
hCoV-19/South_Africa/NHLS-UCT-GS-AZ75/2021|EPI_ISL_11265087|2021-07-06	21J	AY.32	B.1.617.2.32	21J	Delta	21J (Delta)
hCoV-19/South_Africa/NHLS-UCT-GS-D229/2021|EPI_ISL_11265115|2021-07-02	21J	AY.32	B.1.617.2.32	21J	Delta	21J (Delta)
hCoV-19/South_Africa/NHLS-UCT-GS-D232/2021|EPI_ISL_11265116|2021-07-02	21J	AY.32	B.1.617.2.32	21J	Delta	21J (Delta)
hCoV-19/South_Africa/NHLS-UCT-GS-D238/2021|EPI_ISL_11265117|2021-07-02	21J	AY.32	B.1.617.2.32	21J	Delta	21J (Delta)
hCoV-19/South_Africa/NHLS-UCT-GS-D268/2021|EPI_ISL_11265118|2021-07-03	21J	AY.45	B.1.617.2.45	21J	Delta	21J (Delta)
hCoV-19/South_Africa/NHLS-UCT-GS-D277/2021|EPI_ISL_11265119|2021-07-03	21J	AY.32	B.1.617.2.32	21J	Delta	21J (Delta)
hCoV-19/South_Africa/NHLS-UCT-GS-D284/2021|EPI_ISL_11265120|2021-07-04	21J	AY.91	B.1.617.2.91	21J	Delta	21J (Delta)
hCoV-19/South_Africa/NHLS-UCT-GS-D308/2021|EPI_ISL_11265121|2021-07-05	21J	AY.32	B.1.617.2.32	21J	Delta	21J (Delta)
hCoV-19/South_Africa/NHLS-UCT-GS-D310/2021|EPI_ISL_11265122|2021-07-05	21J	AY.32	B.1.617.2.32	21J	Delta	21J (Delta)
hCoV-19/South_Africa/NHLS-UCT-GS-D363/2021|EPI_ISL_11265123|2021-07-06	21J	AY.32	B.1.617.2.32	21J	Delta	21J (Delta)
hCoV-19/South_Africa/SU-NHLS_4181/2021|EPI_ISL_11331281|2021-07-05	20B	B.1.1.528	B.1.1.528	20B	unassigned	20B
hCoV-19/South_Africa/SU-NHLS_4182/2021|EPI_ISL_11331282|2021-07-05	21J	AY.32	B.1.617.2.32	21J	Delta	21J (Delta)
hCoV-19/South_Africa/NICD-S067-002-008/2021|EPI_ISL_11435100|2021-07-02	21J	AY.45	B.1.617.2.45	21J	Delta	21J (Delta)
hCoV-19/South_Africa/NICD-S070-002-002/2021|EPI_ISL_11435105|2021-07-03	21J	AY.45	B.1.617.2.45	21J	Delta	21J (Delta)
hCoV-19/South_Africa/NICD-S075-002-001/2021|EPI_ISL_11435117|2021-07-02	21J	AY.45	B.1.617.2.45	21J	Delta	21J (Delta)
hCoV-19/South_Africa/NICD-S075-003-002/2021|EPI_ISL_11435118|2021-07-05	21J	AY.45	B.1.617.2.45	21J	Delta	21J (Delta)
hCoV-19/South_Africa/NICD-S075-005-001/2021|EPI_ISL_11435120|2021-07-02	21J	AY.45	B.1.617.2.45	21J	Delta	21J (Delta)
hCoV-19/South_Africa/NICD-S075-006-001/2021|EPI_ISL_11435121|2021-07-02	21J	AY.45	B.1.617.2.45	21J	Delta	21J (Delta)
hCoV-19/Nigeria/NCDC-NR-GL-004012/2021|EPI_ISL_11501810|2021-07-10	21J	AY.36	B.1.617.2.36	21J	Delta	21J (Delta)
hCoV-19/South_Africa/NCV993/2021|EPI_ISL_11674416|2021-07-02	21J	AY.45	B.1.617.2.45	21J	Delta	21J (Delta)
hCoV-19/South_Africa/UW21070836533/2021|EPI_ISL_11784820|2021-07-08	21I	AY.38	B.1.617.2.38	21I	Delta	21I (Delta)
hCoV-19/South_Africa/UW21070535637/2021|EPI_ISL_11784823|2021-07-05	21J	AY.45	B.1.617.2.45	21J	Delta	21J (Delta)
hCoV-19/South_Africa/UW21070950720/2021|EPI_ISL_11784825|2021-07-09	21J	AY.32	B.1.617.2.32	21J	Delta	21J (Delta)
hCoV-19/Kenya/SS7207/2021|EPI_ISL_11828150|2021-07-02	21A	B.1.617.2	B.1.617.2	21A	Delta	21A (Delta)
hCoV-19/Kenya/SS7209/2021|EPI_ISL_11828152|2021-07-02	21A	AY.16	B.1.617.2.16	21A	Delta	21A (Delta)
hCoV-19/Kenya/SS7210/2021|EPI_ISL_11828154|2021-07-06	21J	AY.122	B.1.617.2.122	21J	Delta	21J (Delta)
hCoV-19/Kenya/SS7215/2021|EPI_ISL_11828159|2021-07-07	21A	AY.16	B.1.617.2.16	21A	Delta	21A (Delta)
hCoV-19/Kenya/SS7220/2021|EPI_ISL_11828164|2021-07-11	21J	AY.46	B.1.617.2.46	21J	Delta	21J (Delta)
hCoV-19/Tunisia/S-0875/2021|EPI_ISL_11881925|2021-07-09	21J	AY.122	B.1.617.2.122	21J	Delta	21J (Delta)
hCoV-19/Tunisia/S-0879/2021|EPI_ISL_11881926|2021-07-09	21J	AY.122	B.1.617.2.122	21J	Delta	21J (Delta)
hCoV-19/Tunisia/S-0899/2021|EPI_ISL_11881927|2021-07-05	21J	AY.122	B.1.617.2.122	21J	Delta	21J (Delta)
hCoV-19/Reunion/LRE-ERFB-2068575953/2021|EPI_ISL_12017638|2021-07-09	20H	B.1.351	B.1.351	20H	Beta	20H (Beta, V2)
hCoV-19/Reunion/LRE-ERFB-2068575839/2021|EPI_ISL_12017658|2021-07-09	20H	B.1.351.2	B.1.351.2	20H	Beta	20H (Beta, V2)
hCoV-19/Reunion/LRE-ERFB-2068575946/2021|EPI_ISL_12018065|2021-07-08	20H	B.1.351	B.1.351	20H	Beta	20H (Beta, V2)
hCoV-19/Reunion/LRE-ERFB-2068575960/2021|EPI_ISL_12018111|2021-07-09	20H	B.1.351	B.1.351	20H	Beta	20H (Beta, V2)
hCoV-19/Reunion/LRE-ERFB-2068575824/2021|EPI_ISL_12018173|2021-07-09	20H	B.1.351.2	B.1.351.2	20H	Beta	20H (Beta, V2)
hCoV-19/Reunion/LRE-ERFB-2068575965/2021|EPI_ISL_12018212|2021-07-09	20H	B.1.351	B.1.351	20H	Beta	20H (Beta, V2)
hCoV-19/Reunion/LRE-ERFB-2068575792/2021|EPI_ISL_12018225|2021-07-09	20H	B.1.351	B.1.351	20H	Beta	20H (Beta, V2)
hCoV-19/Reunion/LRE-ERFB-2068575931/2021|EPI_ISL_12018320|2021-07-09	20H	B.1.351	B.1.351	20H	Beta	20H (Beta, V2)
hCoV-19/Reunion/LRE-ERFB-2068575951/2021|EPI_ISL_12018383|2021-07-09	20H	B.1.351	B.1.351	20H	Beta	20H (Beta, V2)
hCoV-19/Reunion/LRE-ERFB-2068575619/2021|EPI_ISL_12018427|2021-07-09	20H	B.1.351.2	B.1.351.2	20H	Beta	20H (Beta, V2)
hCoV-19/Reunion/LRE-ERFB-2068575773/2021|EPI_ISL_12018438|2021-07-10	20H	B.1.351	B.1.351	20H	Beta	20H (Beta, V2)
hCoV-19/Reunion/LRE-ERFB-2068575764/2021|EPI_ISL_12018441|2021-07-10	20H	B.1.351	B.1.351	20H	Beta	20H (Beta, V2)
hCoV-19/Reunion/LRE-ERFB-2068575956/2021|EPI_ISL_12018508|2021-07-10	20H	B.1.351.2	B.1.351.2	20H	Beta	20H (Beta, V2)
hCoV-19/Reunion/LRE-ERFB-2068575780/2021|EPI_ISL_12018734|2021-07-09	20H	B.1.351.2	B.1.351.2	20H	Beta	20H (Beta, V2)
hCoV-19/Reunion/LRE-ERFB-2068575786/2021|EPI_ISL_12018796|2021-07-10	20H	B.1.351.2	B.1.351.2	20H	Beta	20H (Beta, V2)
hCoV-19/Reunion/LRE-ERFB-2068575871/2021|EPI_ISL_12018887|2021-07-10	20H	B.1.351	B.1.351	20H	Beta	20H (Beta, V2)
hCoV-19/Reunion/LRE-ERFB-2068575810/2021|EPI_ISL_12018893|2021-07-09	20H	B.1.351.2	B.1.351.2	20H	Beta	20H (Beta, V2)
hCoV-19/Reunion/LRE-ERFB-2068575927/2021|EPI_ISL_12018896|2021-07-09	20H	B.1.351	B.1.351	20H	Beta	20H (Beta, V2)
hCoV-19/Reunion/LRE-ERFB-2068575832/2021|EPI_ISL_12019113|2021-07-09	20H	B.1.351.2	B.1.351.2	20H	Beta	20H (Beta, V2)
hCoV-19/Kenya/KKT-07-07-002/2021|EPI_ISL_12028752|2021-07-07	21A	AY.16	B.1.617.2.16	21A	Delta	21A (Delta)
hCoV-19/Kenya/KCRH-5354-8-7-2021/2021|EPI_ISL_12028810|2021-07-08	21A	AY.16	B.1.617.2.16	21A	Delta	21A (Delta)
hCoV-19/Kenya/KCRH-5344-8-7-2021/2021|EPI_ISL_12028811|2021-07-08	21A	AY.16	B.1.617.2.16	21A	Delta	21A (Delta)
hCoV-19/Kenya/KCRH-5336-07-7-2021/2021|EPI_ISL_12028813|2021-07-07	21A	AY.16	B.1.617.2.16	21A	Delta	21A (Delta)
hCoV-19/Kenya/KCRH-5317-06-7-2021/2021|EPI_ISL_12028815|2021-07-06	21A	AY.16	B.1.617.2.16	21A	Delta	21A (Delta)
hCoV-19/Kenya/GKP-9-06-07-21/2021|EPI_ISL_12028827|2021-07-06	21A	AY.16	B.1.617.2.16	21A	Delta	21A (Delta)
hCoV-19/Kenya/GKP-8-06-07-21/2021|EPI_ISL_12028830|2021-07-06	21A	AY.16	B.1.617.2.16	21A	Delta	21A (Delta)
hCoV-19/Kenya/GKP-6-06-07-21/2021|EPI_ISL_12028832|2021-07-06	21A	AY.16	B.1.617.2.16	21A	Delta	21A (Delta)
hCoV-19/Kenya/GKP-5-06-07-21/2021|EPI_ISL_12028833|2021-07-06	21A	AY.16	B.1.617.2.16	21A	Delta	21A (Delta)
hCoV-19/Kenya/GKP-48-06-07-21/2021|EPI_ISL_12028835|2021-07-06	21A	AY.16	B.1.617.2.16	21A	Delta	21A (Delta)
hCoV-19/Kenya/GKP-46-06-07-21/2021|EPI_ISL_12028836|2021-07-06	21A	AY.16	B.1.617.2.16	21A	Delta	21A (Delta)
hCoV-19/Kenya/GKP-35-06-07-21/2021|EPI_ISL_12028839|2021-07-06	21A	AY.16	B.1.617.2.16	21A	Delta	21A (Delta)
hCoV-19/Kenya/GKP-191-06-07-21/2021|EPI_ISL_12028843|2021-07-06	20I	B.1.1.7	B.1.1.7	20I	Alpha	20I (Alpha, V1)
hCoV-19/Kenya/GKP-150-06-07-21/2021|EPI_ISL_12028848|2021-07-06	20I	B.1.1.7	B.1.1.7	20I	Alpha	20I (Alpha, V1)
hCoV-19/Kenya/GKP-133-06-07-21/2021|EPI_ISL_12028850|2021-07-06	21A	AY.16	B.1.617.2.16	21A	Delta	21A (Delta)
hCoV-19/Kenya/GKP-120-06-07-21/2021|EPI_ISL_12028853|2021-07-06	21A	AY.16	B.1.617.2.16	21A	Delta	21A (Delta)
hCoV-19/Kenya/GKP-104-06-07-21/2021|EPI_ISL_12028854|2021-07-06	21A	AY.16	B.1.617.2.16	21A	Delta	21A (Delta)
hCoV-19/Algeria/55605/2021|EPI_ISL_12156758|2021-07-06	20I	Q.7	B.1.1.7.7	20I	Alpha	20I (Alpha, V1)
hCoV-19/Algeria/55198/2021|EPI_ISL_12156759|2021-07-06	20I	Q.7	B.1.1.7.7	20I	Alpha	20I (Alpha, V1)
hCoV-19/Algeria/54697/2021|EPI_ISL_12156760|2021-07-07	21J	B.1.617.2	B.1.617.2	21J	Delta	21J (Delta)
hCoV-19/Ghana/KST-3576/2021|EPI_ISL_12280457|2021-07-03	21J	AY.88	B.1.617.2.88	21J	Delta	21J (Delta)
hCoV-19/Ghana/KST-3587/2021|EPI_ISL_12280549|2021-07-04	21J	AY.88	B.1.617.2.88	21J	Delta	21J (Delta)
hCoV-19/Ghana/KST-3592/2021|EPI_ISL_12280550|2021-07-04	21J	AY.88	B.1.617.2.88	21J	Delta	21J (Delta)
hCoV-19/Ghana/KST-3593/2021|EPI_ISL_12280551|2021-07-04	21J	AY.88	B.1.617.2.88	21J	Delta	21J (Delta)
hCoV-19/Ghana/KST-3602/2021|EPI_ISL_12280583|2021-07-06	21J	B.1.617.2	B.1.617.2	21J	Delta	21J (Delta)
hCoV-19/Ghana/KST-3611/2021|EPI_ISL_12280584|2021-07-06	21J	AY.88	B.1.617.2.88	21J	Delta	21J (Delta)
hCoV-19/Ghana/WACCBIP-GS2897/2021|EPI_ISL_13392270|2021-07-11	21J	AY.88	B.1.617.2.88	21J	Delta	21J (Delta)
hCoV-19/Ghana/WACCBIP-GS2898/2021|EPI_ISL_13392310|2021-07-11	21J	B.1.617.2	B.1.617.2	21J	Delta	21J (Delta)
hCoV-19/Uganda/078/2021|EPI_ISL_13860468|2021-07-08	19B	A.23.1	A.23.1	19B	unassigned	19B
hCoV-19/Uganda/083/2021|EPI_ISL_13860472|2021-07-09	21J	AY.46	B.1.617.2.46	21J	Delta	21J (Delta)
hCoV-19/South_Africa/NHLS-UCT-GS-BL68/2021|EPI_ISL_14446967|2021-07-07	21J	AY.32	B.1.617.2.32	21J	Delta	21J (Delta)
hCoV-19/South_Africa/NHLS-UCT-GS-BL70/2021|EPI_ISL_14446968|2021-07-09	21J	AY.32	B.1.617.2.32	21J	Delta	21J (Delta)
hCoV-19/Africa/Johannesburg-2036/2021|EPI_ISL_14594715|2021-07-05	21J	AY.45	B.1.617.2.45	21J	Delta	21J (Delta)
hCoV-19/Kenya/KEM-21-07-102815/2021|EPI_ISL_15266644|2021-07-07	21A	AY.16	B.1.617.2.16	21A	Delta	21A (Delta)
hCoV-19/Kenya/KEM-21-7-102854/2021|EPI_ISL_15266645|2021-07-07	21J	AY.46	B.1.617.2.46	21J	Delta	21J (Delta)
hCoV-19/Kenya/KEM-21-7-102737/2021|EPI_ISL_15266652|2021-07-02	21I	B.1.617.2	B.1.617.2	21I	Delta	21I (Delta)
hCoV-19/Kenya/KEM-21-7-102738/2021|EPI_ISL_15266653|2021-07-02	21A	B.1.617.2	B.1.617.2	21A	Delta	21A (Delta)
hCoV-19/Kenya/KEM-21-7-102756/2021|EPI_ISL_15266654|2021-07-05	21A	B.1.617.2	B.1.617.2	21A	Delta	21A (Delta)
hCoV-19/Kenya/KEM-21-07-102812/2021|EPI_ISL_15266655|2021-07-07	21A	AY.16	B.1.617.2.16	21A	Delta	21A (Delta)
hCoV-19/Kenya/KEM-21-07-102864/2021|EPI_ISL_15266656|2021-07-08	21A	AY.16	B.1.617.2.16	21A	Delta	21A (Delta)
hCoV-19/Kenya/KEM-21-07-102883/2021|EPI_ISL_15266658|2021-07-08	21A	AY.16	B.1.617.2.16	21A	Delta	21A (Delta)
hCoV-19/Kenya/KEM-21-07-102940/2021|EPI_ISL_15266659|2021-07-11	21A	AY.16	B.1.617.2.16	21A	Delta	21A (Delta)
hCoV-19/South_Africa/NHLS-UCT-GS-D569/2021|EPI_ISL_15808861|2021-07-05	21J	AY.45	B.1.617.2.45	21J	Delta	21J (Delta)
hCoV-19/South_Africa/NCV1686/2021|EPI_ISL_16064204|2021-07-05	21J	AY.45	B.1.617.2.45	21J	Delta	21J (Delta)
hCoV-19/South_Africa/NCV1691/2021|EPI_ISL_16064205|2021-07-05	21J	AY.45	B.1.617.2.45	21J	Delta	21J (Delta)
hCoV-19/South_Africa/NCV1711/2021|EPI_ISL_16064232|2021-07-05	20H	B.1.351	B.1.351	20H	Beta	20H (Beta, V2)
hCoV-19/South_Africa/NICD-A152-001-198/2021|EPI_ISL_16078445|2021-07-05	21J	AY.45	B.1.617.2.45	21J	Delta	21J (Delta)
hCoV-19/South_Africa/NICD-A203-005-198/2021|EPI_ISL_16078451|2021-07-05	21J	AY.45	B.1.617.2.45	21J	Delta	21J (Delta)
hCoV-19/South_Africa/NICD-A231-010-198/2021|EPI_ISL_16078454|2021-07-06	21J	AY.45	B.1.617.2.45	21J	Delta	21J (Delta)
hCoV-19/South_Africa/NICD-A243-004-198/2021|EPI_ISL_16078459|2021-07-05	21J	B.1.617.2	B.1.617.2	21J	Delta	21J (Delta)
hCoV-19/South_Africa/NICD-A312-004-198/2021|EPI_ISL_16078466|2021-07-05	21J	AY.45	B.1.617.2.45	21J	Delta	21J (Delta)
hCoV-19/South_Africa/NICD-A332-005-198/2021|EPI_ISL_16078469|2021-07-05	21J	AY.45	B.1.617.2.45	21J	Delta	21J (Delta)
hCoV-19/South_Africa/NICD-K053-002-199/2021|EPI_ISL_16078476|2021-07-08	21J	B.1.617.2	B.1.617.2	21J	Delta	21J (Delta)
hCoV-19/South_Africa/NICD-K136-005-198/2021|EPI_ISL_16078477|2021-07-05	21J	B.1.617.2	B.1.617.2	21J	Delta	21J (Delta)
hCoV-19/South_Africa/NICD-A222-004-197/2021|EPI_ISL_16078505|2021-07-02	21A	AY.19	B.1.617.2.19	21A	Delta	21A (Delta)
hCoV-19/South_Africa/NICD-A273-003-198/2021|EPI_ISL_16078533|2021-07-05	21A	AY.19	B.1.617.2.19	21A	Delta	21A (Delta)
hCoV-19/South_Africa/NICD-A332-003-199/2021|EPI_ISL_16078544|2021-07-08	21J	AY.45	B.1.617.2.45	21J	Delta	21J (Delta)
hCoV-19/South_Africa/NICD-A342-006-199/2021|EPI_ISL_16078546|2021-07-08	21J	B.1.617.2	B.1.617.2	21J	Delta	21J (Delta)
hCoV-19/South_Africa/NICD-K334-003-199/2021|EPI_ISL_16078586|2021-07-08	21J	B.1.617.2	B.1.617.2	21J	Delta	21J (Delta)
hCoV-19/South_Africa/NICD-A235-003-198/2021|EPI_ISL_16078593|2021-07-05	21J	B.1.617.2	B.1.617.2	21J	Delta	21J (Delta)
hCoV-19/South_Africa/NICD-A248-004-198/2021|EPI_ISL_16078594|2021-07-05	21J	AY.45	B.1.617.2.45	21J	Delta	21J (Delta)
hCoV-19/South_Africa/NICD-A113-011-199/2021|EPI_ISL_16078599|2021-07-08	20D	C.1.2	B.1.1.1.1.2	20D	unassigned	20D
hCoV-19/South_Africa/NICD-A342-003-198/2021|EPI_ISL_16078652|2021-07-05	21A	AY.19	B.1.617.2.19	21A	Delta	21A (Delta)
hCoV-19/South_Africa/NICD-A217-005-199/2021|EPI_ISL_16078654|2021-07-08	21J	AY.45	B.1.617.2.45	21J	Delta	21J (Delta)
hCoV-19/South_Africa/NICD-A276-011-198/2021|EPI_ISL_16078655|2021-07-06	21A	AY.19	B.1.617.2.19	21A	Delta	21A (Delta)
hCoV-19/Malawi/SCA1122C1V1/2021|EPI_ISL_16401739|2021-07-05	21I	B.1.617.2	B.1.617.2	21I	Delta	21I (Delta)
hCoV-19/South_Africa/NHLS-UCT-GS-D635/2021|EPI_ISL_16438053|2021-07-09	21J	AY.45	B.1.617.2.45	21J	Delta	21J (Delta)
hCoV-19/Cameroon/CIRCB-33765/2021|EPI_ISL_16871352|2021-07-02	20A	B.1.620	B.1.620	20A	unassigned	20A
hCoV-19/Mozambique/MZ-L-IBV-97035922/2021|EPI_ISL_17075821|2021-07-08	21J	AY.122	B.1.617.2.122	21J	Delta	21J (Delta)
hCoV-19/Mozambique/MZ-L-IBV-97035924/2021|EPI_ISL_17075822|2021-07-07	21J	AY.45	B.1.617.2.45	21J	Delta	21J (Delta)
hCoV-19/Mozambique/MZ-L-IBV-97035931/2021|EPI_ISL_17075826|2021-07-05	21J	AY.122	B.1.617.2.122	21J	Delta	21J (Delta)
hCoV-19/Mozambique/MZ-L-IBV-97035932/2021|EPI_ISL_17075827|2021-07-05	21J	B.1.617.2	B.1.617.2	21J	Delta	21J (Delta)
hCoV-19/Mozambique/MZ-L-IBV-97035934/2021|EPI_ISL_17075828|2021-07-05	21J	AY.122	B.1.617.2.122	21J	Delta	21J (Delta)
hCoV-19/Mozambique/MZ-L-IBV-97035935/2021|EPI_ISL_17075829|2021-07-05	21J	AY.122	B.1.617.2.122	21J	Delta	21J (Delta)
hCoV-19/Mozambique/MZ-L-IBV-97035938/2021|EPI_ISL_17075831|2021-07-05	21J	AY.122	B.1.617.2.122	21J	Delta	21J (Delta)
hCoV-19/Mozambique/MZ-L-IBV-97035939/2021|EPI_ISL_17075832|2021-07-05	21J	B.1.617.2	B.1.617.2	21J	Delta	21J (Delta)
hCoV-19/Mozambique/MZ-L-IBV-97035940/2021|EPI_ISL_17075833|2021-07-05	21J	AY.45	B.1.617.2.45	21J	Delta	21J (Delta)
hCoV-19/Mozambique/MZ-L-IBV-97035947/2021|EPI_ISL_17075835|2021-07-07	21J	AY.45	B.1.617.2.45	21J	Delta	21J (Delta)
hCoV-19/Mozambique/MZ-L-IBV-97035949/2021|EPI_ISL_17075836|2021-07-09	21J	B.1.617.2	B.1.617.2	21J	Delta	21J (Delta)
hCoV-19/Mozambique/MZ-L-IBV-97035950/2021|EPI_ISL_17075837|2021-07-09	21J	AY.45	B.1.617.2.45	21J	Delta	21J (Delta)
hCoV-19/Mozambique/MZ-L-IBV-97035952/2021|EPI_ISL_17075838|2021-07-09	21J	AY.45	B.1.617.2.45	21J	Delta	21J (Delta)
hCoV-19/Mozambique/MZ-L-IBV-97035956/2021|EPI_ISL_17075841|2021-07-08	21J	AY.122	B.1.617.2.122	21J	Delta	21J (Delta)
hCoV-19/Mozambique/MZ-L-IBV-97035957/2021|EPI_ISL_17075842|2021-07-08	21J	AY.122	B.1.617.2.122	21J	Delta	21J (Delta)
hCoV-19/Mozambique/MZ-L-IBV-97035958/2021|EPI_ISL_17075843|2021-07-08	21J	AY.122	B.1.617.2.122	21J	Delta	21J (Delta)
hCoV-19/Mozambique/MZ-L-IBV-97035959/2021|EPI_ISL_17075844|2021-07-08	21J	AY.122	B.1.617.2.122	21J	Delta	21J (Delta)
hCoV-19/Mozambique/MZ-L-IBV-97035960/2021|EPI_ISL_17075845|2021-07-08	21J	AY.6	B.1.617.2.6	21J	Delta	21J (Delta)
hCoV-19/Mozambique/MZ-L-IBV-97035961/2021|EPI_ISL_17075846|2021-07-06	21J	AY.122	B.1.617.2.122	21J	Delta	21J (Delta)
hCoV-19/Mozambique/MZ-L-IBV-97035968/2021|EPI_ISL_17075850|2021-07-08	21A	B.1.617.2	B.1.617.2	21A	Delta	21A (Delta)
hCoV-19/Mozambique/MZ-L-IBV-97035969/2021|EPI_ISL_17075851|2021-07-08	21A	B.1.617.2	B.1.617.2	21A	Delta	21A (Delta)
hCoV-19/Mozambique/MZ-L-IBV-97035985/2021|EPI_ISL_17075862|2021-07-02	21J	AY.122	B.1.617.2.122	21J	Delta	21J (Delta)
hCoV-19/Mozambique/MZ-L-IBV-97035986/2021|EPI_ISL_17075863|2021-07-02	21J	AY.122	B.1.617.2.122	21J	Delta	21J (Delta)
hCoV-19/Mozambique/MZ-L-IBV-97035987/2021|EPI_ISL_17075864|2021-07-03	21J	AY.122	B.1.617.2.122	21J	Delta	21J (Delta)
hCoV-19/Mozambique/MZ-L-IBV-97035988/2021|EPI_ISL_17075865|2021-07-02	21J	AY.122	B.1.617.2.122	21J	Delta	21J (Delta)
hCoV-19/Mozambique/MZ-L-IBV-97035995/2021|EPI_ISL_17075870|2021-07-03	21J	AY.122	B.1.617.2.122	21J	Delta	21J (Delta)
hCoV-19/Mozambique/MZ-L-IBV-97036000/2021|EPI_ISL_17075874|2021-07-05	21J	AY.45	B.1.617.2.45	21J	Delta	21J (Delta)
hCoV-19/Mozambique/MZ-L-IBV-97036005/2021|EPI_ISL_17075879|2021-07-05	21J	AY.122	B.1.617.2.122	21J	Delta	21J (Delta)
hCoV-19/Mozambique/MZ-L-IBV-97036073/2021|EPI_ISL_17075928|2021-07-05	21J	AY.45	B.1.617.2.45	21J	Delta	21J (Delta)
hCoV-19/Mozambique/MZ-L-IBV-97036095/2021|EPI_ISL_17075943|2021-07-05	21J	AY.6	B.1.617.2.6	21J	Delta	21J (Delta)
hCoV-19/Mozambique/MZ-L-IBV-97036100/2021|EPI_ISL_17075947|2021-07-05	21J	AY.122	B.1.617.2.122	21J	Delta	21J (Delta)
hCoV-19/Mozambique/MZ-L-IBV-97036101/2021|EPI_ISL_17075948|2021-07-05	21J	AY.45	B.1.617.2.45	21J	Delta	21J (Delta)
hCoV-19/South_Africa/NICD-AHRI-N51649/2021|EPI_ISL_17284792|2021-07-08	20H	B.1.351	B.1.351	20H	Beta	20H (Beta, V2)
hCoV-19/Uganda/UVRI_382821/2021|EPI_ISL_17292894|2021-07-06	21J	AY.46	B.1.617.2.46	21J	Delta	21J (Delta)
hCoV-19/Uganda/UVRI_383046/2021|EPI_ISL_17292898|2021-07-04	21J	AY.46	B.1.617.2.46	21J	Delta	21J (Delta)
hCoV-19/Uganda/UVRI_384516/2021|EPI_ISL_17292919|2021-07-11	21J	AY.46	B.1.617.2.46	21J	Delta	21J (Delta)
hCoV-19/Uganda/UVRI_384646/2021|EPI_ISL_17292928|2021-07-10	21J	AY.46.4	B.1.617.2.46.4	21J	Delta	21J (Delta)
hCoV-19/Uganda/UVRI_386030/2021|EPI_ISL_17292954|2021-07-11	21J	AY.46	B.1.617.2.46	21J	Delta	21J (Delta)
hCoV-19/South_Africa/UW-0209201/2021|EPI_ISL_17758068|2021-07-02	21J	AY.45	B.1.617.2.45	21J	Delta	21J (Delta)
hCoV-19/South_Africa/UW-0273878/2021|EPI_ISL_17758069|2021-07-02	21J	AY.32	B.1.617.2.32	21J	Delta	21J (Delta)
hCoV-19/South_Africa/UW-0329826/2021|EPI_ISL_17758070|2021-07-03	21J	AY.91	B.1.617.2.91	21J	Delta	21J (Delta)
hCoV-19/South_Africa/UW-0352017/2021|EPI_ISL_17758071|2021-07-03	21J	AY.45	B.1.617.2.45	21J	Delta	21J (Delta)
hCoV-19/South_Africa/UW-0391275/2021|EPI_ISL_17758072|2021-07-03	21J	AY.99	B.1.617.2.99	21J	Delta	21J (Delta)
hCoV-19/South_Africa/UW-0404254/2021|EPI_ISL_17758073|2021-07-04	21A	AY.19	B.1.617.2.19	21A	Delta	21A (Delta)
hCoV-19/South_Africa/UW-0459217/2021|EPI_ISL_17758074|2021-07-04	21I	AY.38	B.1.617.2.38	21I	Delta	21I (Delta)
hCoV-19/South_Africa/UW-0492184/2021|EPI_ISL_17758075|2021-07-04	21J	AY.45	B.1.617.2.45	21J	Delta	21J (Delta)
hCoV-19/South_Africa/UW-0508135/2021|EPI_ISL_17758076|2021-07-05	21I	AY.38	B.1.617.2.38	21I	Delta	21I (Delta)
hCoV-19/South_Africa/UW-0576042/2021|EPI_ISL_17758077|2021-07-05	21I	AY.38	B.1.617.2.38	21I	Delta	21I (Delta)
hCoV-19/South_Africa/UW-0576596/2021|EPI_ISL_17758078|2021-07-05	21I	AY.38	B.1.617.2.38	21I	Delta	21I (Delta)
hCoV-19/South_Africa/UW-0586060/2021|EPI_ISL_17758079|2021-07-05	21J	AY.45	B.1.617.2.45	21J	Delta	21J (Delta)
hCoV-19/South_Africa/UW-0595584/2021|EPI_ISL_17758080|2021-07-05	20D	C.1.2	B.1.1.1.1.2	20D	unassigned	20D
hCoV-19/South_Africa/UW-0625557/2021|EPI_ISL_17758082|2021-07-06	21J	AY.45	B.1.617.2.45	21J	Delta	21J (Delta)
hCoV-19/South_Africa/UW-0739111/2021|EPI_ISL_17758083|2021-07-07	21J	AY.45	B.1.617.2.45	21J	Delta	21J (Delta)
hCoV-19/South_Africa/UW-0750236/2021|EPI_ISL_17758084|2021-07-07	21J	AY.45	B.1.617.2.45	21J	Delta	21J (Delta)
hCoV-19/Reunion/CHU7210708607/2021|EPI_ISL_6779368|2021-07-06	20H	B.1.351.2	B.1.351.2	20H	Beta	20H (Beta, V2)
hCoV-19/Reunion/CHU7210702947/2021|EPI_ISL_6779375|2021-07-03	20H	B.1.351.2	B.1.351.2	20H	Beta	20H (Beta, V2)
hCoV-19/Reunion/CHU798000072097/2021|EPI_ISL_6779377|2021-07-03	20H	B.1.351.2	B.1.351.2	20H	Beta	20H (Beta, V2)
hCoV-19/Reunion/CHU7210708613/2021|EPI_ISL_6779451|2021-07-06	20H	B.1.351.2	B.1.351.2	20H	Beta	20H (Beta, V2)
hCoV-19/Reunion/CHU5210709451/2021|EPI_ISL_6779529|2021-07-09	20H	B.1.351	B.1.351	20H	Beta	20H (Beta, V2)
hCoV-19/Reunion/CHU7210721282/2021|EPI_ISL_6779530|2021-07-10	20H	B.1.351	B.1.351	20H	Beta	20H (Beta, V2)
hCoV-19/Reunion/CHU7210712431/2021|EPI_ISL_6779533|2021-07-11	20H	B.1.351	B.1.351	20H	Beta	20H (Beta, V2)
hCoV-19/Reunion/CHU7210710725/2021|EPI_ISL_6779534|2021-07-10	20H	B.1.351	B.1.351	20H	Beta	20H (Beta, V2)
hCoV-19/Reunion/CHU7210712773/2021|EPI_ISL_6779540|2021-07-05	20H	B.1.351	B.1.351	20H	Beta	20H (Beta, V2)
hCoV-19/Reunion/CHU7210705773/2021|EPI_ISL_6779541|2021-07-05	20H	B.1.351	B.1.351	20H	Beta	20H (Beta, V2)
hCoV-19/Reunion/CHU7210712771/2021|EPI_ISL_6779542|2021-07-05	20H	B.1.351	B.1.351	20H	Beta	20H (Beta, V2)
hCoV-19/Reunion/CHU7210708618/2021|EPI_ISL_6779543|2021-07-06	20H	B.1.351	B.1.351	20H	Beta	20H (Beta, V2)
hCoV-19/Reunion/CHU7210708612/2021|EPI_ISL_6779544|2021-07-06	20H	B.1.351	B.1.351	20H	Beta	20H (Beta, V2)
hCoV-19/Reunion/CHU7210708609/2021|EPI_ISL_6779545|2021-07-06	20H	B.1.351	B.1.351	20H	Beta	20H (Beta, V2)
hCoV-19/Reunion/CHU798000071671/2021|EPI_ISL_6779558|2021-07-02	20H	B.1.351	B.1.351	20H	Beta	20H (Beta, V2)
hCoV-19/Reunion/CHU798000072303/2021|EPI_ISL_6779559|2021-07-02	20H	B.1.351	B.1.351	20H	Beta	20H (Beta, V2)
hCoV-19/Reunion/CHU5210702045/2021|EPI_ISL_6779563|2021-07-02	20H	B.1.351	B.1.351	20H	Beta	20H (Beta, V2)
hCoV-19/Reunion/CHU798000071648/2021|EPI_ISL_6779564|2021-07-02	20H	B.1.351	B.1.351	20H	Beta	20H (Beta, V2)
hCoV-19/Reunion/CHU7210721392/2021|EPI_ISL_6779619|2021-07-11	20I	B.1.1.7	B.1.1.7	20I	Alpha	20I (Alpha, V1)
hCoV-19/Reunion/CHU7210703410/2021|EPI_ISL_6779625|2021-07-03	20H	B.1.351.2	B.1.351.2	20H	Beta	20H (Beta, V2)
hCoV-19/Kenya/SS4071/2021|EPI_ISL_6940175|2021-07-05	20I	B.1.1.7	B.1.1.7	20I	Alpha	20I (Alpha, V1)
hCoV-19/Malawi/MLW-00152/2021|EPI_ISL_6963079|2021-07-05	21I	B.1.617.2	B.1.617.2	21I	Delta	21I (Delta)
hCoV-19/Malawi/MLW-00163/2021|EPI_ISL_6963090|2021-07-09	21A	B.1.617.2	B.1.617.2	21A	Delta	21A (Delta)
hCoV-19/Malawi/MLW-00164/2021|EPI_ISL_6963091|2021-07-09	21I	B.1.617.2	B.1.617.2	21I	Delta	21I (Delta)
hCoV-19/Malawi/MLW-00223/2021|EPI_ISL_6963142|2021-07-02	21A	B.1.617.2	B.1.617.2	21A	Delta	21A (Delta)
hCoV-19/Malawi/MLW-00227/2021|EPI_ISL_6963146|2021-07-05	21A	B.1.617.2	B.1.617.2	21A	Delta	21A (Delta)
hCoV-19/Malawi/MLW-00230/2021|EPI_ISL_6963149|2021-07-07	21A	B.1.617.2	B.1.617.2	21A	Delta	21A (Delta)
hCoV-19/Malawi/MLW-00236/2021|EPI_ISL_6963155|2021-07-09	21A	B.1.617.2	B.1.617.2	21A	Delta	21A (Delta)
hCoV-19/Malawi/MLW-00238/2021|EPI_ISL_6963157|2021-07-09	21J	AY.116	B.1.617.2.116	21J	Delta	21J (Delta)
hCoV-19/Benin/NMIMR-LCP90838/2021|EPI_ISL_7139860|2021-07-08	21A	B.1.617.2	B.1.617.2	21A	Delta	21A (Delta)
hCoV-19/Benin/NMIMR-LCP90864/2021|EPI_ISL_7139861|2021-07-09	21J	AY.122	B.1.617.2.122	21J	Delta	21J (Delta)
hCoV-19/Madagascar/LA2M-111610/2021|EPI_ISL_7722671|2021-07-06	20H	B.1.351.2	B.1.351.2	20H	Beta	20H (Beta, V2)
hCoV-19/Madagascar/LA2M-111647/2021|EPI_ISL_7722675|2021-07-06	20H	B.1.351.2	B.1.351.2	20H	Beta	20H (Beta, V2)
hCoV-19/Madagascar/LA2M-111702/2021|EPI_ISL_7722680|2021-07-07	20H	B.1.351.2	B.1.351.2	20H	Beta	20H (Beta, V2)
hCoV-19/Madagascar/LA2M-111723/2021|EPI_ISL_7722689|2021-07-07	20H	B.1.351.2	B.1.351.2	20H	Beta	20H (Beta, V2)
hCoV-19/Madagascar/LA2M-111732/2021|EPI_ISL_7722694|2021-07-07	20H	B.1.351.2	B.1.351.2	20H	Beta	20H (Beta, V2)
hCoV-19/Madagascar/LA2M-111735/2021|EPI_ISL_7722699|2021-07-07	20H	B.1.351.2	B.1.351.2	20H	Beta	20H (Beta, V2)
hCoV-19/Madagascar/LA2M-111788/2021|EPI_ISL_7722703|2021-07-08	20H	B.1.351.2	B.1.351.2	20H	Beta	20H (Beta, V2)
hCoV-19/Madagascar/LA2M-111793/2021|EPI_ISL_7722707|2021-07-08	20H	B.1.351.2	B.1.351.2	20H	Beta	20H (Beta, V2)
hCoV-19/Madagascar/LA2M-111805/2021|EPI_ISL_7722709|2021-07-08	20H	B.1.351.2	B.1.351.2	20H	Beta	20H (Beta, V2)
hCoV-19/Madagascar/LA2M-111985/2021|EPI_ISL_7722712|2021-07-08	20H	B.1.351.2	B.1.351.2	20H	Beta	20H (Beta, V2)
hCoV-19/Madagascar/LA2M-111988/2021|EPI_ISL_7722716|2021-07-08	20H	B.1.351.2	B.1.351.2	20H	Beta	20H (Beta, V2)
hCoV-19/Madagascar/LA2M-112156/2021|EPI_ISL_7722721|2021-07-10	20H	B.1.351.2	B.1.351.2	20H	Beta	20H (Beta, V2)
hCoV-19/Madagascar/LA2M-112158/2021|EPI_ISL_7722726|2021-07-10	20H	B.1.351.2	B.1.351.2	20H	Beta	20H (Beta, V2)
hCoV-19/South_Africa/NHLS-UCT-GS-D692/2021|EPI_ISL_7883638|2021-07-11	21J	AY.32	B.1.617.2.32	21J	Delta	21J (Delta)
hCoV-19/Ghana/NMIMR-NCOV-21-55820/2021|EPI_ISL_8065624|2021-07-09	21J	AY.88	B.1.617.2.88	21J	Delta	21J (Delta)
hCoV-19/Ghana/NMIMR-NCOV-21-55844/2021|EPI_ISL_8065626|2021-07-09	21J	AY.88	B.1.617.2.88	21J	Delta	21J (Delta)
hCoV-19/Ghana/NMIMR-NCOV-21-55845/2021|EPI_ISL_8065627|2021-07-09	21J	AY.88	B.1.617.2.88	21J	Delta	21J (Delta)
hCoV-19/Ghana/NMIMR-NCOV-21-55846/2021|EPI_ISL_8065628|2021-07-09	21J	AY.122	B.1.617.2.122	21J	Delta	21J (Delta)
hCoV-19/Ghana/NMIMR-NCOV-21-55847/2021|EPI_ISL_8065629|2021-07-09	21J	AY.122	B.1.617.2.122	21J	Delta	21J (Delta)
hCoV-19/Ghana/NMIMR-NCOV-21-55848/2021|EPI_ISL_8065630|2021-07-09	21J	AY.88	B.1.617.2.88	21J	Delta	21J (Delta)
hCoV-19/Ghana/NMIMR-NCOV-21-55868/2021|EPI_ISL_8065632|2021-07-09	21J	AY.88	B.1.617.2.88	21J	Delta	21J (Delta)
hCoV-19/Ghana/NMIMR-NCOV-21-55871/2021|EPI_ISL_8065633|2021-07-09	21J	AY.88	B.1.617.2.88	21J	Delta	21J (Delta)
hCoV-19/Ghana/NMIMR-NCOV-21-55883/2021|EPI_ISL_8065634|2021-07-09	21J	AY.88	B.1.617.2.88	21J	Delta	21J (Delta)
hCoV-19/Ghana/NMIMR-NCOV-21-55899/2021|EPI_ISL_8065635|2021-07-09	21J	AY.88	B.1.617.2.88	21J	Delta	21J (Delta)
hCoV-19/Ghana/NMIMR-NCOV-21-55912/2021|EPI_ISL_8065636|2021-07-09	21J	B.1.617.2	B.1.617.2	21J	Delta	21J (Delta)
hCoV-19/Ghana/NMIMR-NCOV-21-55918/2021|EPI_ISL_8065637|2021-07-09	21J	B.1.617.2	B.1.617.2	21J	Delta	21J (Delta)
hCoV-19/Ghana/NMIMR-NUP-21-9418/2021|EPI_ISL_8065638|2021-07-09	21J	AY.88	B.1.617.2.88	21J	Delta	21J (Delta)
hCoV-19/Ghana/NMIMR-NUR-21-31000/2021|EPI_ISL_8065639|2021-07-09	21J	B.1.617.2	B.1.617.2	21J	Delta	21J (Delta)
hCoV-19/Ghana/NMIMR-NUR-21-31007/2021|EPI_ISL_8065640|2021-07-09	21J	B.1.617.2	B.1.617.2	21J	Delta	21J (Delta)
hCoV-19/Ghana/NMIMR-NUR-21-31041/2021|EPI_ISL_8065641|2021-07-09	21J	AY.122	B.1.617.2.122	21J	Delta	21J (Delta)
hCoV-19/Ghana/NMIMR-NUR-21-31049/2021|EPI_ISL_8065642|2021-07-09	21J	AY.88	B.1.617.2.88	21J	Delta	21J (Delta)
hCoV-19/Ghana/NMIMR-NUR-21-31051/2021|EPI_ISL_8065643|2021-07-09	21J	AY.88	B.1.617.2.88	21J	Delta	21J (Delta)
hCoV-19/Ghana/NMIMR-RT-NUR-29830/2021|EPI_ISL_8065645|2021-07-09	21J	AY.88	B.1.617.2.88	21J	Delta	21J (Delta)
hCoV-19/Ghana/NMIMR-RT-NUR-30402/2021|EPI_ISL_8065646|2021-07-09	21J	AY.88	B.1.617.2.88	21J	Delta	21J (Delta)
hCoV-19/Morocco/RA42C/2021|EPI_ISL_8178768|2021-07-04	21H	B.1.621	B.1.621	21H	Mu	21H (Mu)
hCoV-19/Madagascar/LA2M-111998/2021|EPI_ISL_8523893|2021-07-08	20H	B.1.351.2	B.1.351.2	20H	Beta	20H (Beta, V2)
hCoV-19/Madagascar/LA2M-112149/2021|EPI_ISL_8523894|2021-07-10	20H	B.1.351.2	B.1.351.2	20H	Beta	20H (Beta, V2)
hCoV-19/Senegal/10113123/2021|EPI_ISL_8526260|2021-07-02	21J	AY.46	B.1.617.2.46	21J	Delta	21J (Delta)
hCoV-19/Senegal/11014359/2021|EPI_ISL_8526296|2021-07-03	21I	B.1.617.2	B.1.617.2	21I	Delta	21I (Delta)
hCoV-19/Senegal/11014760/2021|EPI_ISL_8526306|2021-07-03	21J	AY.34.1	B.1.617.2.34.1	21J	Delta	21J (Delta)
hCoV-19/Senegal/11015026/2021|EPI_ISL_8526310|2021-07-03	21J	AY.34	B.1.617.2.34	21J	Delta	21J (Delta)
hCoV-19/Senegal/11015373/2021|EPI_ISL_8526324|2021-07-03	21J	AY.34	B.1.617.2.34	21J	Delta	21J (Delta)
hCoV-19/Senegal/11015499/2021|EPI_ISL_8526327|2021-07-04	21J	AY.34	B.1.617.2.34	21J	Delta	21J (Delta)
hCoV-19/Senegal/11015604/2021|EPI_ISL_8526331|2021-07-04	21D	B.1.525	B.1.525	21D	Eta	21D (Eta)
hCoV-19/Senegal/11015632/2021|EPI_ISL_8526334|2021-07-04	21J	AY.34	B.1.617.2.34	21J	Delta	21J (Delta)
hCoV-19/Senegal/11045899/2021|EPI_ISL_8526358|2021-07-05	21J	B.1.617.2	B.1.617.2	21J	Delta	21J (Delta)
hCoV-19/Senegal/11046178/2021|EPI_ISL_8526366|2021-07-05	21J	AY.34	B.1.617.2.34	21J	Delta	21J (Delta)
hCoV-19/Senegal/11046227/2021|EPI_ISL_8526371|2021-07-05	21J	AY.34.1	B.1.617.2.34.1	21J	Delta	21J (Delta)
hCoV-19/Senegal/11046280/2021|EPI_ISL_8526372|2021-07-05	21J	AY.34	B.1.617.2.34	21J	Delta	21J (Delta)
hCoV-19/Senegal/11046299/2021|EPI_ISL_8526373|2021-07-05	21J	AY.34	B.1.617.2.34	21J	Delta	21J (Delta)
hCoV-19/Senegal/11046351/2021|EPI_ISL_8526375|2021-07-05	21J	AY.34.1	B.1.617.2.34.1	21J	Delta	21J (Delta)
hCoV-19/Senegal/11046396/2021|EPI_ISL_8526381|2021-07-05	21J	B.1.617.2	B.1.617.2	21J	Delta	21J (Delta)
hCoV-19/Senegal/11046472/2021|EPI_ISL_8526388|2021-07-05	21I	B.1.617.2	B.1.617.2	21I	Delta	21I (Delta)
hCoV-19/Senegal/11046614/2021|EPI_ISL_8526395|2021-07-05	21J	AY.34	B.1.617.2.34	21J	Delta	21J (Delta)
hCoV-19/Senegal/11046687/2021|EPI_ISL_8526398|2021-07-05	21J	AY.34	B.1.617.2.34	21J	Delta	21J (Delta)
hCoV-19/Senegal/11057232/2021|EPI_ISL_8526415|2021-07-06	21J	AY.34	B.1.617.2.34	21J	Delta	21J (Delta)
hCoV-19/Senegal/11057334/2021|EPI_ISL_8526421|2021-07-06	21J	AY.34	B.1.617.2.34	21J	Delta	21J (Delta)
hCoV-19/Senegal/11057473/2021|EPI_ISL_8526425|2021-07-06	21J	AY.34.1	B.1.617.2.34.1	21J	Delta	21J (Delta)
hCoV-19/Senegal/11064935/2021|EPI_ISL_8526429|2021-07-06	21J	AY.34.1	B.1.617.2.34.1	21J	Delta	21J (Delta)
hCoV-19/Senegal/11064948/2021|EPI_ISL_8526431|2021-07-06	21J	AY.34	B.1.617.2.34	21J	Delta	21J (Delta)
hCoV-19/Senegal/11064969/2021|EPI_ISL_8526434|2021-07-06	21J	AY.34.1	B.1.617.2.34.1	21J	Delta	21J (Delta)
hCoV-19/Senegal/236847/2021|EPI_ISL_8526438|2021-07-07	21J	AY.34.1	B.1.617.2.34.1	21J	Delta	21J (Delta)
hCoV-19/Senegal/236948/2021|EPI_ISL_8526442|2021-07-07	21J	AY.34.1	B.1.617.2.34.1	21J	Delta	21J (Delta)
hCoV-19/Senegal/236970/2021|EPI_ISL_8526443|2021-07-07	21J	AY.34	B.1.617.2.34	21J	Delta	21J (Delta)
hCoV-19/Senegal/236975/2021|EPI_ISL_8526444|2021-07-07	21J	AY.34	B.1.617.2.34	21J	Delta	21J (Delta)
hCoV-19/Senegal/196790/2021|EPI_ISL_8526454|2021-07-05	21J	AY.34.1	B.1.617.2.34.1	21J	Delta	21J (Delta)
hCoV-19/Senegal/237132/2021|EPI_ISL_8526455|2021-07-08	21J	AY.34	B.1.617.2.34	21J	Delta	21J (Delta)
hCoV-19/Senegal/237254/2021|EPI_ISL_8526460|2021-07-08	21J	AY.34	B.1.617.2.34	21J	Delta	21J (Delta)
hCoV-19/Senegal/237536/2021|EPI_ISL_8526475|2021-07-09	21J	AY.34	B.1.617.2.34	21J	Delta	21J (Delta)
hCoV-19/Senegal/196804/2021|EPI_ISL_8526476|2021-07-09	21J	AY.34	B.1.617.2.34	21J	Delta	21J (Delta)
hCoV-19/Senegal/237572/2021|EPI_ISL_8526478|2021-07-09	21J	AY.34	B.1.617.2.34	21J	Delta	21J (Delta)
hCoV-19/Senegal/237573/2021|EPI_ISL_8526479|2021-07-09	21J	AY.34	B.1.617.2.34	21J	Delta	21J (Delta)
hCoV-19/Senegal/237632/2021|EPI_ISL_8526482|2021-07-09	21J	AY.34.1	B.1.617.2.34.1	21J	Delta	21J (Delta)
hCoV-19/Senegal/237643/2021|EPI_ISL_8526483|2021-07-09	21J	AY.34.1	B.1.617.2.34.1	21J	Delta	21J (Delta)
hCoV-19/Senegal/237752/2021|EPI_ISL_8526485|2021-07-09	21I	B.1.617.2	B.1.617.2	21I	Delta	21I (Delta)
hCoV-19/Senegal/196812/2021|EPI_ISL_8526489|2021-07-09	21J	AY.34.1	B.1.617.2.34.1	21J	Delta	21J (Delta)
hCoV-19/Senegal/196821/2021|EPI_ISL_8526491|2021-07-10	21J	AY.34.1	B.1.617.2.34.1	21J	Delta	21J (Delta)
hCoV-19/Senegal/196751/2021|EPI_ISL_8527185|2021-07-06	21J	AY.34.1	B.1.617.2.34.1	21J	Delta	21J (Delta)
hCoV-19/Senegal/196755/2021|EPI_ISL_8527186|2021-07-06	21J	AY.34	B.1.617.2.34	21J	Delta	21J (Delta)
hCoV-19/Senegal/196767/2021|EPI_ISL_8527189|2021-07-07	21J	AY.34.1	B.1.617.2.34.1	21J	Delta	21J (Delta)
hCoV-19/Senegal/196800/2021|EPI_ISL_8527191|2021-07-09	21J	AY.34	B.1.617.2.34	21J	Delta	21J (Delta)
hCoV-19/Mozambique/CERI-KRISP-K027168/2021|EPI_ISL_8799657|2021-07-05	21J	AY.6	B.1.617.2.6	21J	Delta	21J (Delta)
hCoV-19/Mozambique/CERI-KRISP-K027169/2021|EPI_ISL_8799658|2021-07-07	21J	AY.6	B.1.617.2.6	21J	Delta	21J (Delta)
hCoV-19/Morocco/112CC/2021|EPI_ISL_8920479|2021-07-06	21J	AY.33	B.1.617.2.33	21J	Delta	21J (Delta)
hCoV-19/Chad/TCH-31/2021|EPI_ISL_9274868|2021-07-05	21J	B.1.617.2	B.1.617.2	21J	Delta	21J (Delta)
hCoV-19/Reunion/PIMIT_14658/2021|EPI_ISL_9370251|2021-07-03	20H	B.1.351.2	B.1.351.2	20H	Beta	20H (Beta, V2)
hCoV-19/Eswatini/N17012/2021|EPI_ISL_9439025|2021-07-09	21J	AY.45	B.1.617.2.45	21J	Delta	21J (Delta)
hCoV-19/Eswatini/N17013/2021|EPI_ISL_9439026|2021-07-09	21J	AY.45	B.1.617.2.45	21J	Delta	21J (Delta)
hCoV-19/South_Africa/NHLS-UCT-GS-D686/2021|EPI_ISL_9573291|2021-07-11	21J	AY.32	B.1.617.2.32	21J	Delta	21J (Delta)
hCoV-19/Reunion/CHU7210728775/2021|EPI_ISL_6778828|2021-07-19	21A	AY.40	B.1.617.2.40	21A	Delta	21A (Delta)
hCoV-19/Reunion/CHU7210728771/2021|EPI_ISL_6778827|2021-07-19	21A	AY.40	B.1.617.2.40	21A	Delta	21A (Delta)
hCoV-19/Reunion/CHU7210728769/2021|EPI_ISL_6778826|2021-07-19	21A	AY.40	B.1.617.2.40	21A	Delta	21A (Delta)
hCoV-19/Reunion/CHU7210728766/2021|EPI_ISL_6778825|2021-07-19	21A	AY.40	B.1.617.2.40	21A	Delta	21A (Delta)
hCoV-19/Reunion/CHU7210728758/2021|EPI_ISL_6778824|2021-07-19	21A	AY.40	B.1.617.2.40	21A	Delta	21A (Delta)
hCoV-19/Reunion/CHU7210728741/2021|EPI_ISL_6778823|2021-07-19	21A	AY.40	B.1.617.2.40	21A	Delta	21A (Delta)
hCoV-19/Reunion/CHU7210728740/2021|EPI_ISL_6778822|2021-07-19	21A	AY.40	B.1.617.2.40	21A	Delta	21A (Delta)
hCoV-19/Reunion/CHU7210728733/2021|EPI_ISL_6778820|2021-07-19	21A	AY.40	B.1.617.2.40	21A	Delta	21A (Delta)
hCoV-19/Reunion/CHU5210719284/2021|EPI_ISL_6778808|2021-07-19	21A	AY.40	B.1.617.2.40	21A	Delta	21A (Delta)
hCoV-19/Reunion/CHU7210728821/2021|EPI_ISL_6778845|2021-07-19	21A	AY.40	B.1.617.2.40	21A	Delta	21A (Delta)
hCoV-19/Reunion/CHU7210728820/2021|EPI_ISL_6778844|2021-07-19	21A	AY.40	B.1.617.2.40	21A	Delta	21A (Delta)
hCoV-19/Reunion/CHU7210728810/2021|EPI_ISL_6778843|2021-07-19	21A	AY.40	B.1.617.2.40	21A	Delta	21A (Delta)
hCoV-19/Reunion/CHU7210728800/2021|EPI_ISL_6778842|2021-07-19	21A	AY.40	B.1.617.2.40	21A	Delta	21A (Delta)
hCoV-19/Reunion/CHU7210720120/2021|EPI_ISL_6778837|2021-07-18	21A	AY.40	B.1.617.2.40	21A	Delta	21A (Delta)
hCoV-19/Reunion/CHU7210728780/2021|EPI_ISL_6778830|2021-07-19	21A	AY.40	B.1.617.2.40	21A	Delta	21A (Delta)
hCoV-19/South_Africa/Tygerberg_1402/2021|EPI_ISL_3118706|2021-07-14	21I	AY.38	B.1.617.2.38	21I	Delta	21I (Delta)
hCoV-19/Reunion/CHU7210724740/2021|EPI_ISL_6778847|2021-07-15	21A	AY.40	B.1.617.2.40	21A	Delta	21A (Delta)
hCoV-19/Reunion/HCL021141565701/2021|EPI_ISL_3633802|2021-07-20	21A	AY.40	B.1.617.2.40	21A	Delta	21A (Delta)
hCoV-19/Reunion/HCL021141570901/2021|EPI_ISL_3633987|2021-07-20	20H	B.1.351	B.1.351	20H	Beta	20H (Beta, V2)
hCoV-19/Reunion/PIMIT_16224/2021|EPI_ISL_3154281|2021-07-12	20H	B.1.351.2	B.1.351.2	20H	Beta	20H (Beta, V2)
hCoV-19/Reunion/PIMIT_16149/2021|EPI_ISL_3154287|2021-07-16	21A	AY.40	B.1.617.2.40	21A	Delta	21A (Delta)
hCoV-19/Reunion/PIMIT_15854/2021|EPI_ISL_3154277|2021-07-12	20H	B.1.351.2	B.1.351.2	20H	Beta	20H (Beta, V2)
hCoV-19/Reunion/PIMIT_15837/2021|EPI_ISL_3154276|2021-07-12	20H	B.1.351.2	B.1.351.2	20H	Beta	20H (Beta, V2)
hCoV-19/Reunion/PIMIT_15863/2021|EPI_ISL_3154279|2021-07-12	20H	B.1.351.2	B.1.351.2	20H	Beta	20H (Beta, V2)
hCoV-19/Reunion/PIMIT_15857/2021|EPI_ISL_3154278|2021-07-12	20H	B.1.351.2	B.1.351.2	20H	Beta	20H (Beta, V2)
hCoV-19/Reunion/PIMIT_16108/2021|EPI_ISL_3154291|2021-07-17	21A	AY.40	B.1.617.2.40	21A	Delta	21A (Delta)
hCoV-19/Reunion/PIMIT_16110/2021|EPI_ISL_3154292|2021-07-17	21A	AY.40	B.1.617.2.40	21A	Delta	21A (Delta)
hCoV-19/Reunion/PIMIT_16119/2021|EPI_ISL_3154295|2021-07-15	21A	AY.40	B.1.617.2.40	21A	Delta	21A (Delta)
hCoV-19/Reunion/PIMIT_16115/2021|EPI_ISL_3154294|2021-07-16	21A	AY.40	B.1.617.2.40	21A	Delta	21A (Delta)
hCoV-19/Reunion/PIMIT_16120/2021|EPI_ISL_3154296|2021-07-17	21A	AY.40	B.1.617.2.40	21A	Delta	21A (Delta)
hCoV-19/Reunion/PIMIT_16123/2021|EPI_ISL_3154298|2021-07-15	21A	AY.40	B.1.617.2.40	21A	Delta	21A (Delta)
hCoV-19/Reunion/PIMIT_15817/2021|EPI_ISL_3153977|2021-07-12	20H	B.1.351	B.1.351	20H	Beta	20H (Beta, V2)
hCoV-19/Reunion/PIMIT_15810/2021|EPI_ISL_3153976|2021-07-12	20H	B.1.351	B.1.351	20H	Beta	20H (Beta, V2)
hCoV-19/Reunion/PIMIT_15881/2021|EPI_ISL_3153979|2021-07-12	20H	B.1.351	B.1.351	20H	Beta	20H (Beta, V2)
hCoV-19/Reunion/PIMIT_15820/2021|EPI_ISL_3153978|2021-07-12	20H	B.1.351	B.1.351	20H	Beta	20H (Beta, V2)
hCoV-19/Reunion/PIMIT_15993/2021|EPI_ISL_3153980|2021-07-14	20H	B.1.351	B.1.351	20H	Beta	20H (Beta, V2)
hCoV-19/Reunion/PIMIT_16244/2021|EPI_ISL_3153984|2021-07-12	20H	B.1.351	B.1.351	20H	Beta	20H (Beta, V2)
hCoV-19/Reunion/PIMIT_16138/2021|EPI_ISL_3154303|2021-07-15	21A	AY.40	B.1.617.2.40	21A	Delta	21A (Delta)
hCoV-19/Reunion/PIMIT_16144/2021|EPI_ISL_3154305|2021-07-16	21A	AY.40	B.1.617.2.40	21A	Delta	21A (Delta)
hCoV-19/Reunion/PIMIT_16148/2021|EPI_ISL_3154307|2021-07-16	21A	AY.40	B.1.617.2.40	21A	Delta	21A (Delta)
hCoV-19/Reunion/PIMIT_16145/2021|EPI_ISL_3154306|2021-07-16	21A	AY.40	B.1.617.2.40	21A	Delta	21A (Delta)
hCoV-19/Reunion/PIMIT_16259/2021|EPI_ISL_3154367|2021-07-12	20H	B.1.351.2	B.1.351.2	20H	Beta	20H (Beta, V2)
hCoV-19/Reunion/PIMIT_15875/2021|EPI_ISL_3154366|2021-07-12	20H	B.1.351.2	B.1.351.2	20H	Beta	20H (Beta, V2)
hCoV-19/Reunion/PIMIT_16187/2021|EPI_ISL_3153823|2021-07-21	20I	B.1.1.7	B.1.1.7	20I	Alpha	20I (Alpha, V1)
hCoV-19/Reunion/PIMIT_16174/2021|EPI_ISL_3154021|2021-07-21	20H	B.1.351.2	B.1.351.2	20H	Beta	20H (Beta, V2)
hCoV-19/Reunion/PIMIT_16140/2021|EPI_ISL_3154087|2021-07-17	20H	B.1.351.2	B.1.351.2	20H	Beta	20H (Beta, V2)
hCoV-19/Botswana/R23B42_BHP_AAB89691/2021|EPI_ISL_3162270|2021-07-13	21J	B.1.617.2	B.1.617.2	21J	Delta	21J (Delta)
hCoV-19/Ethiopia/CERI-KRISP-K025773/2021|EPI_ISL_5425635|2021-07-15	20A	B.1	B.1	20A	unassigned	20A
hCoV-19/Ethiopia/CERI-KRISP-K024816/2021|EPI_ISL_4875043|2021-07-20	21J	AY.120	B.1.617.2.120	21J	Delta	21J (Delta)
hCoV-19/South_Africa/NICD-N14986/2021|EPI_ISL_4891726|2021-07-20	21J	AY.45	B.1.617.2.45	21J	Delta	21J (Delta)
hCoV-19/South_Africa/NICD-N14993/2021|EPI_ISL_4891727|2021-07-16	21J	AY.45	B.1.617.2.45	21J	Delta	21J (Delta)
hCoV-19/South_Africa/NICD-N14997/2021|EPI_ISL_4891728|2021-07-19	21I	AY.38	B.1.617.2.38	21I	Delta	21I (Delta)
hCoV-19/South_Africa/NICD-N15000/2021|EPI_ISL_4891729|2021-07-19	21J	AY.122	B.1.617.2.122	21J	Delta	21J (Delta)
hCoV-19/South_Africa/NICD-N14967/2021|EPI_ISL_4891721|2021-07-20	21J	AY.45	B.1.617.2.45	21J	Delta	21J (Delta)
hCoV-19/South_Africa/NICD-N14968/2021|EPI_ISL_4891722|2021-07-15	21J	AY.45	B.1.617.2.45	21J	Delta	21J (Delta)
hCoV-19/South_Africa/NICD-N14973/2021|EPI_ISL_4891723|2021-07-15	21J	AY.45	B.1.617.2.45	21J	Delta	21J (Delta)
hCoV-19/South_Africa/NICD-N14984/2021|EPI_ISL_4891724|2021-07-22	21J	AY.122	B.1.617.2.122	21J	Delta	21J (Delta)
hCoV-19/South_Africa/NICD-N14961/2021|EPI_ISL_4891717|2021-07-19	21J	AY.45	B.1.617.2.45	21J	Delta	21J (Delta)
hCoV-19/South_Africa/NICD-N14962/2021|EPI_ISL_4891718|2021-07-19	21J	AY.45	B.1.617.2.45	21J	Delta	21J (Delta)
hCoV-19/South_Africa/NICD-N14964/2021|EPI_ISL_4891719|2021-07-19	21J	AY.45	B.1.617.2.45	21J	Delta	21J (Delta)
hCoV-19/Reunion/HCL021130475301/2021|EPI_ISL_3205482|2021-07-19	20H	B.1.351.2	B.1.351.2	20H	Beta	20H (Beta, V2)
hCoV-19/Reunion/HCL021132251001/2021|EPI_ISL_3205507|2021-07-13	20H	B.1.351	B.1.351	20H	Beta	20H (Beta, V2)
hCoV-19/Reunion/HCL021132267401/2021|EPI_ISL_3205509|2021-07-13	20H	B.1.351	B.1.351	20H	Beta	20H (Beta, V2)
hCoV-19/Reunion/HCL021132285101/2021|EPI_ISL_3205513|2021-07-13	20H	B.1.351	B.1.351	20H	Beta	20H (Beta, V2)
hCoV-19/Reunion/HCL021132312401/2021|EPI_ISL_3205516|2021-07-13	20H	B.1.351.2	B.1.351.2	20H	Beta	20H (Beta, V2)
hCoV-19/South_Africa/NICD-R10872/2021|EPI_ISL_3219903|2021-07-22	21J	AY.45	B.1.617.2.45	21J	Delta	21J (Delta)
hCoV-19/South_Africa/NICD-R10954/2021|EPI_ISL_3219912|2021-07-20	21A	AY.19	B.1.617.2.19	21A	Delta	21A (Delta)
hCoV-19/South_Africa/NICD-R11022/2021|EPI_ISL_3219914|2021-07-22	21J	AY.45	B.1.617.2.45	21J	Delta	21J (Delta)
hCoV-19/South_Africa/NICD-R10883/2021|EPI_ISL_3219915|2021-07-19	21J	AY.45	B.1.617.2.45	21J	Delta	21J (Delta)
hCoV-19/South_Africa/NICD-R10882/2021|EPI_ISL_3219917|2021-07-21	21J	AY.32	B.1.617.2.32	21J	Delta	21J (Delta)
hCoV-19/South_Africa/NICD-R10571/2021|EPI_ISL_3219919|2021-07-15	21J	AY.32	B.1.617.2.32	21J	Delta	21J (Delta)
hCoV-19/South_Africa/NICD-R10676/2021|EPI_ISL_3219892|2021-07-16	21I	B.1.617.2	B.1.617.2	21I	Delta	21I (Delta)
hCoV-19/South_Africa/NICD-R10864/2021|EPI_ISL_3219896|2021-07-20	21J	AY.45	B.1.617.2.45	21J	Delta	21J (Delta)
hCoV-19/South_Africa/NICD-R10819/2021|EPI_ISL_3219867|2021-07-21	21J	AY.116.1	B.1.617.2.116.1	21J	Delta	21J (Delta)
hCoV-19/South_Africa/NICD-R10686/2021|EPI_ISL_3219852|2021-07-19	21J	AY.45	B.1.617.2.45	21J	Delta	21J (Delta)
hCoV-19/South_Africa/NICD-R10894/2021|EPI_ISL_3219858|2021-07-22	21J	AY.116.1	B.1.617.2.116.1	21J	Delta	21J (Delta)
hCoV-19/South_Africa/NICD-R10529/2021|EPI_ISL_3219881|2021-07-14	21J	AY.32	B.1.617.2.32	21J	Delta	21J (Delta)
hCoV-19/South_Africa/NICD-R10527/2021|EPI_ISL_3219882|2021-07-14	21J	AY.32	B.1.617.2.32	21J	Delta	21J (Delta)
hCoV-19/South_Africa/NICD-R10534/2021|EPI_ISL_3219883|2021-07-14	21J	AY.32	B.1.617.2.32	21J	Delta	21J (Delta)
hCoV-19/South_Africa/NICD-R10530/2021|EPI_ISL_3219884|2021-07-14	21J	AY.32	B.1.617.2.32	21J	Delta	21J (Delta)
hCoV-19/South_Africa/NICD-R10653/2021|EPI_ISL_3219889|2021-07-16	21J	AY.32	B.1.617.2.32	21J	Delta	21J (Delta)
hCoV-19/South_Africa/NICD-R10536/2021|EPI_ISL_3219872|2021-07-13	21J	AY.32	B.1.617.2.32	21J	Delta	21J (Delta)
hCoV-19/South_Africa/NICD-R10537/2021|EPI_ISL_3219873|2021-07-13	21J	AY.32	B.1.617.2.32	21J	Delta	21J (Delta)
hCoV-19/South_Africa/NICD-R10523/2021|EPI_ISL_3219874|2021-07-13	21J	AY.32	B.1.617.2.32	21J	Delta	21J (Delta)
hCoV-19/South_Africa/NICD-R10577/2021|EPI_ISL_3219876|2021-07-13	21J	AY.32	B.1.617.2.32	21J	Delta	21J (Delta)
hCoV-19/South_Africa/NICD-R10467/2021|EPI_ISL_3219824|2021-07-14	21J	AY.45	B.1.617.2.45	21J	Delta	21J (Delta)
hCoV-19/South_Africa/NICD-R10470/2021|EPI_ISL_3219826|2021-07-14	21J	AY.45	B.1.617.2.45	21J	Delta	21J (Delta)
hCoV-19/South_Africa/NICD-R10559/2021|EPI_ISL_3219827|2021-07-15	21J	AY.99	B.1.617.2.99	21J	Delta	21J (Delta)
hCoV-19/South_Africa/NICD-R10631/2021|EPI_ISL_3219829|2021-07-16	21J	AY.45	B.1.617.2.45	21J	Delta	21J (Delta)
hCoV-19/South_Africa/NICD-R10848/2021|EPI_ISL_3219812|2021-07-21	21I	B.1.617.2	B.1.617.2	21I	Delta	21I (Delta)
hCoV-19/South_Africa/NICD-R11005/2021|EPI_ISL_3219813|2021-07-22	21J	AY.45	B.1.617.2.45	21J	Delta	21J (Delta)
hCoV-19/South_Africa/NICD-R11010/2021|EPI_ISL_3219815|2021-07-22	21J	AY.45	B.1.617.2.45	21J	Delta	21J (Delta)
hCoV-19/South_Africa/NICD-R11006/2021|EPI_ISL_3219816|2021-07-22	21J	AY.45	B.1.617.2.45	21J	Delta	21J (Delta)
hCoV-19/South_Africa/NICD-R10473/2021|EPI_ISL_3219817|2021-07-14	21J	AY.45	B.1.617.2.45	21J	Delta	21J (Delta)
hCoV-19/South_Africa/NICD-R10474/2021|EPI_ISL_3219818|2021-07-14	21J	AY.45	B.1.617.2.45	21J	Delta	21J (Delta)
hCoV-19/South_Africa/NICD-R10544/2021|EPI_ISL_3219840|2021-07-15	21J	AY.45	B.1.617.2.45	21J	Delta	21J (Delta)
hCoV-19/South_Africa/NICD-R10551/2021|EPI_ISL_3219842|2021-07-15	21J	AY.45	B.1.617.2.45	21J	Delta	21J (Delta)
hCoV-19/South_Africa/NICD-R10596/2021|EPI_ISL_3219846|2021-07-16	21J	AY.45	B.1.617.2.45	21J	Delta	21J (Delta)
hCoV-19/South_Africa/NICD-R10598/2021|EPI_ISL_3219847|2021-07-16	21J	AY.45	B.1.617.2.45	21J	Delta	21J (Delta)
hCoV-19/South_Africa/NICD-R10780/2021|EPI_ISL_3219834|2021-07-20	21J	AY.45	B.1.617.2.45	21J	Delta	21J (Delta)
hCoV-19/South_Africa/NICD-R10931/2021|EPI_ISL_3219838|2021-07-20	21J	AY.45	B.1.617.2.45	21J	Delta	21J (Delta)
hCoV-19/South_Africa/NICD-R10899/2021|EPI_ISL_3219839|2021-07-21	21J	AY.46.5	B.1.617.2.46.5	21J	Delta	21J (Delta)
hCoV-19/South_Africa/NICD-R10461/2021|EPI_ISL_3219801|2021-07-14	21J	AY.45	B.1.617.2.45	21J	Delta	21J (Delta)
hCoV-19/South_Africa/NICD-R10634/2021|EPI_ISL_3219802|2021-07-16	21J	AY.45	B.1.617.2.45	21J	Delta	21J (Delta)
hCoV-19/South_Africa/NICD-R10628/2021|EPI_ISL_3219803|2021-07-16	21J	AY.45	B.1.617.2.45	21J	Delta	21J (Delta)
hCoV-19/South_Africa/NICD-R10630/2021|EPI_ISL_3219805|2021-07-16	20D	C.1.2	B.1.1.1.1.2	20D	unassigned	20D
hCoV-19/South_Africa/NICD-R10782/2021|EPI_ISL_3219809|2021-07-20	21J	AY.45	B.1.617.2.45	21J	Delta	21J (Delta)
hCoV-19/South_Africa/NICD-R10554/2021|EPI_ISL_3219782|2021-07-13	21A	AY.19	B.1.617.2.19	21A	Delta	21A (Delta)
hCoV-19/South_Africa/NICD-R10946/2021|EPI_ISL_3219786|2021-07-20	21J	AY.45	B.1.617.2.45	21J	Delta	21J (Delta)
hCoV-19/South_Africa/NICD-R10923/2021|EPI_ISL_3219787|2021-07-20	21J	AY.45	B.1.617.2.45	21J	Delta	21J (Delta)
hCoV-19/South_Africa/NICD-R10921/2021|EPI_ISL_3219788|2021-07-20	21J	AY.46	B.1.617.2.46	21J	Delta	21J (Delta)
hCoV-19/South_Africa/NICD-R10922/2021|EPI_ISL_3219789|2021-07-20	21J	AY.45	B.1.617.2.45	21J	Delta	21J (Delta)
hCoV-19/South_Africa/NICD-R10641/2021|EPI_ISL_3219773|2021-07-16	20H	B.1.351	B.1.351	20H	Beta	20H (Beta, V2)
hCoV-19/South_Africa/NICD-R10701/2021|EPI_ISL_3219774|2021-07-19	21J	AY.45	B.1.617.2.45	21J	Delta	21J (Delta)
hCoV-19/South_Africa/NICD-R11075/2021|EPI_ISL_3219776|2021-07-22	21J	AY.45	B.1.617.2.45	21J	Delta	21J (Delta)
hCoV-19/South_Africa/NICD-R11078/2021|EPI_ISL_3219777|2021-07-22	21J	AY.45	B.1.617.2.45	21J	Delta	21J (Delta)
hCoV-19/South_Africa/NICD-R10909/2021|EPI_ISL_3219790|2021-07-21	21J	AY.45	B.1.617.2.45	21J	Delta	21J (Delta)
hCoV-19/South_Africa/NICD-R10945/2021|EPI_ISL_3219791|2021-07-22	21J	AY.45	B.1.617.2.45	21J	Delta	21J (Delta)
hCoV-19/South_Africa/NICD-R10928/2021|EPI_ISL_3219795|2021-07-22	21J	AY.45	B.1.617.2.45	21J	Delta	21J (Delta)
hCoV-19/South_Africa/NICD-R10464/2021|EPI_ISL_3219797|2021-07-14	21J	AY.45	B.1.617.2.45	21J	Delta	21J (Delta)
hCoV-19/South_Africa/NICD-R10459/2021|EPI_ISL_3219799|2021-07-14	21J	AY.45	B.1.617.2.45	21J	Delta	21J (Delta)
hCoV-19/Morocco/FMP-344/2021|EPI_ISL_4945298|2021-07-12	21J	B.1.617.2	B.1.617.2	21J	Delta	21J (Delta)
hCoV-19/Morocco/FMP-350/2021|EPI_ISL_4945816|2021-07-22	21A	AY.51	B.1.617.2.51	21A	Delta	21A (Delta)
hCoV-19/Morocco/FMP-351/2021|EPI_ISL_4945821|2021-07-22	21A	AY.51	B.1.617.2.51	21A	Delta	21A (Delta)
hCoV-19/Morocco/FMP-343/2021|EPI_ISL_4945008|2021-07-13	21J	AY.33	B.1.617.2.33	21J	Delta	21J (Delta)
hCoV-19/South_Africa/KRISP-K020372/2021|EPI_ISL_3261965|2021-07-19	21J	AY.45	B.1.617.2.45	21J	Delta	21J (Delta)
hCoV-19/South_Africa/KRISP-K020378/2021|EPI_ISL_3261970|2021-07-19	20D	C.1.2	B.1.1.1.1.2	20D	unassigned	20D
hCoV-19/South_Africa/KRISP-K020382/2021|EPI_ISL_3261974|2021-07-19	21J	AY.45	B.1.617.2.45	21J	Delta	21J (Delta)
hCoV-19/South_Africa/KRISP-K020380/2021|EPI_ISL_3261972|2021-07-19	21J	AY.45	B.1.617.2.45	21J	Delta	21J (Delta)
hCoV-19/South_Africa/KRISP-K020371/2021|EPI_ISL_3261964|2021-07-19	21J	AY.45	B.1.617.2.45	21J	Delta	21J (Delta)
hCoV-19/South_Africa/KRISP-K020370/2021|EPI_ISL_3261963|2021-07-19	21J	AY.45	B.1.617.2.45	21J	Delta	21J (Delta)
hCoV-19/South_Africa/KRISP-K020367/2021|EPI_ISL_3261961|2021-07-19	21J	AY.45	B.1.617.2.45	21J	Delta	21J (Delta)
hCoV-19/Ghana/WACCBIP-GS1085/2021|EPI_ISL_3268196|2021-07-13	21J	AY.88	B.1.617.2.88	21J	Delta	21J (Delta)
hCoV-19/South_Africa/NICD-R10621/2021|EPI_ISL_3281585|2021-07-16	21J	AY.45	B.1.617.2.45	21J	Delta	21J (Delta)
hCoV-19/South_Africa/NICD-N13230/2021|EPI_ISL_3342297|2021-07-21	21I	B.1.617.2	B.1.617.2	21I	Delta	21I (Delta)
hCoV-19/South_Africa/NICD-N13270/2021|EPI_ISL_3342328|2021-07-16	21I	B.1.617.2	B.1.617.2	21I	Delta	21I (Delta)
hCoV-19/South_Africa/NICD-N13266/2021|EPI_ISL_3342325|2021-07-17	21I	B.1.617.2	B.1.617.2	21I	Delta	21I (Delta)
hCoV-19/South_Africa/NICD-N13260/2021|EPI_ISL_3342320|2021-07-16	21J	AY.45	B.1.617.2.45	21J	Delta	21J (Delta)
hCoV-19/South_Africa/NICD-N13252/2021|EPI_ISL_3342313|2021-07-22	21J	AY.45	B.1.617.2.45	21J	Delta	21J (Delta)
hCoV-19/South_Africa/NICD-N13248/2021|EPI_ISL_3342311|2021-07-21	21J	AY.45	B.1.617.2.45	21J	Delta	21J (Delta)
hCoV-19/South_Africa/NICD-N13245/2021|EPI_ISL_3342309|2021-07-21	21I	B.1.617.2	B.1.617.2	21I	Delta	21I (Delta)
hCoV-19/South_Africa/NICD-N13241/2021|EPI_ISL_3342305|2021-07-21	21J	AY.45	B.1.617.2.45	21J	Delta	21J (Delta)
hCoV-19/South_Africa/NICD-N12515/2021|EPI_ISL_3342153|2021-07-12	21J	AY.45	B.1.617.2.45	21J	Delta	21J (Delta)
hCoV-19/South_Africa/NICD-N12575/2021|EPI_ISL_3342196|2021-07-12	21J	AY.45	B.1.617.2.45	21J	Delta	21J (Delta)
hCoV-19/South_Africa/NICD-N12555/2021|EPI_ISL_3342179|2021-07-13	21J	AY.45	B.1.617.2.45	21J	Delta	21J (Delta)
hCoV-19/South_Africa/NICD-N12549/2021|EPI_ISL_3342174|2021-07-13	21J	AY.45	B.1.617.2.45	21J	Delta	21J (Delta)
hCoV-19/South_Africa/NICD-N12551/2021|EPI_ISL_3342175|2021-07-13	21J	AY.45	B.1.617.2.45	21J	Delta	21J (Delta)
hCoV-19/South_Africa/NICD-N12541/2021|EPI_ISL_3342171|2021-07-12	21J	AY.45	B.1.617.2.45	21J	Delta	21J (Delta)
hCoV-19/South_Africa/NICD-N12589/2021|EPI_ISL_3342207|2021-07-12	21J	AY.45	B.1.617.2.45	21J	Delta	21J (Delta)
hCoV-19/South_Africa/NICD-N12769/2021|EPI_ISL_3342239|2021-07-12	21J	AY.45	B.1.617.2.45	21J	Delta	21J (Delta)
hCoV-19/South_Africa/KRISP-K021930/2021|EPI_ISL_3799185|2021-07-12	20A	B.1	B.1	20A	unassigned	20A
hCoV-19/Algeria/57453/2021|EPI_ISL_3375634|2021-07-13	21J	AY.109	B.1.617.2.109	21J	Delta	21J (Delta)
hCoV-19/Ethiopia/CERI-KRISP-K025776/2021|EPI_ISL_5425636|2021-07-15	20A	B.1.480	B.1.480	20A	unassigned	20A
hCoV-19/Reunion/HCL021138649602/2021|EPI_ISL_3380259|2021-07-20	20H	B.1.351.2	B.1.351.2	20H	Beta	20H (Beta, V2)
hCoV-19/Reunion/HCL021138726301/2021|EPI_ISL_3380517|2021-07-20	21J	AY.101	B.1.617.2.101	21J	Delta	21J (Delta)
hCoV-19/Reunion/HCL021138723501/2021|EPI_ISL_3380510|2021-07-20	20H	B.1.351.2	B.1.351.2	20H	Beta	20H (Beta, V2)
hCoV-19/Reunion/HCL021138745101/2021|EPI_ISL_3380638|2021-07-20	21A	AY.40	B.1.617.2.40	21A	Delta	21A (Delta)
hCoV-19/Reunion/HCL021138673901/2021|EPI_ISL_3380367|2021-07-20	20H	B.1.351.2	B.1.351.2	20H	Beta	20H (Beta, V2)
hCoV-19/Reunion/HCL021138669001/2021|EPI_ISL_3380351|2021-07-20	20H	B.1.351.2	B.1.351.2	20H	Beta	20H (Beta, V2)
hCoV-19/Reunion/HCL021138678301/2021|EPI_ISL_3380379|2021-07-20	20H	B.1.351	B.1.351	20H	Beta	20H (Beta, V2)
hCoV-19/Reunion/HCL021138663401/2021|EPI_ISL_3380317|2021-07-20	20H	B.1.351.2	B.1.351.2	20H	Beta	20H (Beta, V2)
hCoV-19/Reunion/HCL021138661701/2021|EPI_ISL_3380306|2021-07-20	20H	B.1.351.2	B.1.351.2	20H	Beta	20H (Beta, V2)
hCoV-19/Reunion/HCL021138667101/2021|EPI_ISL_3380338|2021-07-20	20H	B.1.351.2	B.1.351.2	20H	Beta	20H (Beta, V2)
hCoV-19/Reunion/HCL021138715801/2021|EPI_ISL_3380474|2021-07-20	21A	AY.40	B.1.617.2.40	21A	Delta	21A (Delta)
hCoV-19/Morocco/FMP-329/2021|EPI_ISL_5116329|2021-07-22	20I	B.1.1.7	B.1.1.7	20I	Alpha	20I (Alpha, V1)
hCoV-19/Reunion/HCL021138691201/2021|EPI_ISL_3380421|2021-07-20	21A	AY.40	B.1.617.2.40	21A	Delta	21A (Delta)
hCoV-19/Reunion/HCL021138690001/2021|EPI_ISL_3380417|2021-07-20	21I	AY.37	B.1.617.2.37	21I	Delta	21I (Delta)
hCoV-19/Reunion/HCL021133705801/2021|EPI_ISL_3382734|2021-07-12	20H	B.1.351	B.1.351	20H	Beta	20H (Beta, V2)
hCoV-19/Reunion/HCL021133706601/2021|EPI_ISL_3382735|2021-07-12	21A	AY.40	B.1.617.2.40	21A	Delta	21A (Delta)
hCoV-19/Reunion/HCL021133161201/2021|EPI_ISL_3382615|2021-07-13	20H	B.1.351	B.1.351	20H	Beta	20H (Beta, V2)
hCoV-19/Reunion/HCL021133132501/2021|EPI_ISL_3382611|2021-07-13	20H	B.1.351	B.1.351	20H	Beta	20H (Beta, V2)
hCoV-19/Reunion/HCL021133056101/2021|EPI_ISL_3382606|2021-07-13	20H	B.1.351	B.1.351	20H	Beta	20H (Beta, V2)
hCoV-19/Reunion/HCL021133121901/2021|EPI_ISL_3382609|2021-07-13	20H	B.1.351	B.1.351	20H	Beta	20H (Beta, V2)
hCoV-19/Reunion/HCL021133043701/2021|EPI_ISL_3382604|2021-07-13	20H	B.1.351	B.1.351	20H	Beta	20H (Beta, V2)
hCoV-19/Reunion/HCL021133978401/2021|EPI_ISL_3382927|2021-07-19	21A	AY.40	B.1.617.2.40	21A	Delta	21A (Delta)
hCoV-19/Reunion/HCL021133979101/2021|EPI_ISL_3382928|2021-07-19	21A	AY.40	B.1.617.2.40	21A	Delta	21A (Delta)
hCoV-19/Ethiopia/CERI-KRISP-K025469/2021|EPI_ISL_5146935|2021-07-17	20A	B.1.480	B.1.480	20A	unassigned	20A
hCoV-19/South_Africa/NICD-N12990/2021|EPI_ISL_3411676|2021-07-15	21J	AY.45	B.1.617.2.45	21J	Delta	21J (Delta)
hCoV-19/South_Africa/NICD-N12986/2021|EPI_ISL_3411672|2021-07-14	21J	AY.99	B.1.617.2.99	21J	Delta	21J (Delta)
hCoV-19/South_Africa/NICD-N12992/2021|EPI_ISL_3411678|2021-07-15	21J	AY.45	B.1.617.2.45	21J	Delta	21J (Delta)
hCoV-19/South_Africa/NICD-N12996/2021|EPI_ISL_3411682|2021-07-15	21A	AY.19	B.1.617.2.19	21A	Delta	21A (Delta)
hCoV-19/South_Africa/NICD-N12975/2021|EPI_ISL_3411661|2021-07-14	21J	AY.120.2	B.1.617.2.120.2	21J	Delta	21J (Delta)
hCoV-19/South_Africa/NICD-N12974/2021|EPI_ISL_3411660|2021-07-14	21J	AY.91	B.1.617.2.91	21J	Delta	21J (Delta)
hCoV-19/South_Africa/NICD-N11550/2021|EPI_ISL_3411817|2021-07-17	21J	AY.45	B.1.617.2.45	21J	Delta	21J (Delta)
hCoV-19/South_Africa/NICD-N12988/2021|EPI_ISL_3411674|2021-07-15	21J	AY.45	B.1.617.2.45	21J	Delta	21J (Delta)
hCoV-19/South_Africa/NICD-N12993/2021|EPI_ISL_3411679|2021-07-15	21J	AY.45	B.1.617.2.45	21J	Delta	21J (Delta)
hCoV-19/South_Africa/NICD-N13001/2021|EPI_ISL_3411687|2021-07-15	21J	AY.120.2	B.1.617.2.120.2	21J	Delta	21J (Delta)
hCoV-19/South_Africa/NICD-N12999/2021|EPI_ISL_3411685|2021-07-14	21J	AY.120.2	B.1.617.2.120.2	21J	Delta	21J (Delta)
hCoV-19/South_Africa/NICD-N13000/2021|EPI_ISL_3411686|2021-07-15	21J	AY.120.2	B.1.617.2.120.2	21J	Delta	21J (Delta)
hCoV-19/South_Africa/NICD-N13005/2021|EPI_ISL_3411691|2021-07-15	21J	AY.120.2	B.1.617.2.120.2	21J	Delta	21J (Delta)
hCoV-19/South_Africa/NICD-N12969/2021|EPI_ISL_3411655|2021-07-14	21J	AY.32	B.1.617.2.32	21J	Delta	21J (Delta)
hCoV-19/South_Africa/NICD-N12980/2021|EPI_ISL_3411666|2021-07-14	21J	AY.120.2	B.1.617.2.120.2	21J	Delta	21J (Delta)
hCoV-19/South_Africa/NICD-N12978/2021|EPI_ISL_3411664|2021-07-14	21J	AY.91	B.1.617.2.91	21J	Delta	21J (Delta)
hCoV-19/South_Africa/NICD-N12983/2021|EPI_ISL_3411669|2021-07-14	21J	AY.45	B.1.617.2.45	21J	Delta	21J (Delta)
hCoV-19/South_Africa/NICD-N12981/2021|EPI_ISL_3411667|2021-07-15	21J	AY.45	B.1.617.2.45	21J	Delta	21J (Delta)
hCoV-19/South_Africa/NICD-N12982/2021|EPI_ISL_3411668|2021-07-15	21J	AY.120.2	B.1.617.2.120.2	21J	Delta	21J (Delta)
hCoV-19/South_Africa/NICD-N12833/2021|EPI_ISL_3411457|2021-07-16	20D	C.1.2	B.1.1.1.1.2	20D	unassigned	20D
hCoV-19/South_Africa/NICD-N13274/2021|EPI_ISL_3411461|2021-07-14	21I	B.1.617.2	B.1.617.2	21I	Delta	21I (Delta)
hCoV-19/South_Africa/KRISP-K020287/2021|EPI_ISL_3447706|2021-07-17	21J	AY.45	B.1.617.2.45	21J	Delta	21J (Delta)
hCoV-19/South_Africa/KRISP-K020275/2021|EPI_ISL_3447714|2021-07-14	20D	C.1.2	B.1.1.1.1.2	20D	unassigned	20D
hCoV-19/South_Africa/NICD-N13355/2021|EPI_ISL_3451435|2021-07-15	21J	AY.120.2	B.1.617.2.120.2	21J	Delta	21J (Delta)
hCoV-19/South_Africa/NICD-N13353/2021|EPI_ISL_3451433|2021-07-15	21J	AY.91	B.1.617.2.91	21J	Delta	21J (Delta)
hCoV-19/South_Africa/NICD-N13351/2021|EPI_ISL_3451431|2021-07-14	21J	AY.120.2	B.1.617.2.120.2	21J	Delta	21J (Delta)
hCoV-19/South_Africa/NICD-N13348/2021|EPI_ISL_3451428|2021-07-12	21J	AY.46	B.1.617.2.46	21J	Delta	21J (Delta)
hCoV-19/South_Africa/NICD-N13346/2021|EPI_ISL_3451426|2021-07-16	21J	AY.91	B.1.617.2.91	21J	Delta	21J (Delta)
hCoV-19/South_Africa/NICD-N13341/2021|EPI_ISL_3451421|2021-07-14	21J	AY.120.2	B.1.617.2.120.2	21J	Delta	21J (Delta)
hCoV-19/South_Africa/NICD-N13342/2021|EPI_ISL_3451422|2021-07-16	21J	AY.45	B.1.617.2.45	21J	Delta	21J (Delta)
hCoV-19/South_Africa/NICD-N13337/2021|EPI_ISL_3451417|2021-07-14	21J	AY.120.2	B.1.617.2.120.2	21J	Delta	21J (Delta)
hCoV-19/South_Africa/NICD-N13335/2021|EPI_ISL_3451415|2021-07-15	21J	AY.46	B.1.617.2.46	21J	Delta	21J (Delta)
hCoV-19/South_Africa/NICD-N13332/2021|EPI_ISL_3451412|2021-07-12	21J	AY.46	B.1.617.2.46	21J	Delta	21J (Delta)
hCoV-19/South_Africa/NICD-N13328/2021|EPI_ISL_3451409|2021-07-15	21J	AY.120.2	B.1.617.2.120.2	21J	Delta	21J (Delta)
hCoV-19/South_Africa/NICD-N13327/2021|EPI_ISL_3451408|2021-07-12	21J	AY.46	B.1.617.2.46	21J	Delta	21J (Delta)
hCoV-19/South_Africa/NICD-N13092/2021|EPI_ISL_3451393|2021-07-16	21J	AY.95	B.1.617.2.95	21J	Delta	21J (Delta)
hCoV-19/South_Africa/NICD-N13093/2021|EPI_ISL_3451394|2021-07-16	21J	AY.45	B.1.617.2.45	21J	Delta	21J (Delta)
hCoV-19/South_Africa/NICD-N13090/2021|EPI_ISL_3451391|2021-07-20	20D	C.1.2	B.1.1.1.1.2	20D	unassigned	20D
hCoV-19/South_Africa/NICD-N12631/2021|EPI_ISL_3451207|2021-07-14	21J	AY.45	B.1.617.2.45	21J	Delta	21J (Delta)
hCoV-19/South_Africa/NICD-N12625/2021|EPI_ISL_3451201|2021-07-15	21J	AY.45	B.1.617.2.45	21J	Delta	21J (Delta)
hCoV-19/South_Africa/NICD-N12671/2021|EPI_ISL_3451239|2021-07-15	21J	AY.45	B.1.617.2.45	21J	Delta	21J (Delta)
hCoV-19/South_Africa/NICD-N12706/2021|EPI_ISL_3451266|2021-07-12	21J	AY.45	B.1.617.2.45	21J	Delta	21J (Delta)
hCoV-19/South_Africa/NICD-N12692/2021|EPI_ISL_3451254|2021-07-16	21J	AY.45	B.1.617.2.45	21J	Delta	21J (Delta)
hCoV-19/South_Africa/NICD-N12612/2021|EPI_ISL_3451189|2021-07-15	21J	AY.45	B.1.617.2.45	21J	Delta	21J (Delta)
hCoV-19/South_Africa/NICD-N12873/2021|EPI_ISL_3451327|2021-07-14	21J	AY.45	B.1.617.2.45	21J	Delta	21J (Delta)
hCoV-19/South_Africa/NICD-N12866/2021|EPI_ISL_3451322|2021-07-14	21J	AY.45	B.1.617.2.45	21J	Delta	21J (Delta)
hCoV-19/South_Africa/NICD-N12856/2021|EPI_ISL_3451314|2021-07-14	21J	AY.45	B.1.617.2.45	21J	Delta	21J (Delta)
hCoV-19/South_Africa/NICD-N12854/2021|EPI_ISL_3451312|2021-07-14	21J	AY.45	B.1.617.2.45	21J	Delta	21J (Delta)
hCoV-19/South_Africa/NICD-N12849/2021|EPI_ISL_3451309|2021-07-14	21J	AY.45	B.1.617.2.45	21J	Delta	21J (Delta)
hCoV-19/South_Africa/NICD-N13053/2021|EPI_ISL_3451363|2021-07-17	21J	AY.45	B.1.617.2.45	21J	Delta	21J (Delta)
hCoV-19/South_Africa/NICD-N13087/2021|EPI_ISL_3451389|2021-07-15	21I	B.1.617.2	B.1.617.2	21I	Delta	21I (Delta)
hCoV-19/South_Africa/NICD-N13082/2021|EPI_ISL_3451386|2021-07-20	21J	AY.45	B.1.617.2.45	21J	Delta	21J (Delta)
hCoV-19/South_Africa/NICD-N13071/2021|EPI_ISL_3451377|2021-07-19	21J	AY.45	B.1.617.2.45	21J	Delta	21J (Delta)
hCoV-19/South_Africa/NICD-N13067/2021|EPI_ISL_3451374|2021-07-19	21J	AY.45	B.1.617.2.45	21J	Delta	21J (Delta)
hCoV-19/South_Africa/NICD-N13063/2021|EPI_ISL_3451370|2021-07-20	21J	AY.45	B.1.617.2.45	21J	Delta	21J (Delta)
hCoV-19/South_Africa/NICD-N12847/2021|EPI_ISL_3451307|2021-07-14	21J	AY.45	B.1.617.2.45	21J	Delta	21J (Delta)
hCoV-19/South_Africa/NICD-N12729/2021|EPI_ISL_3451289|2021-07-17	21A	AY.19	B.1.617.2.19	21A	Delta	21A (Delta)
hCoV-19/South_Africa/NICD-N12728/2021|EPI_ISL_3451288|2021-07-16	21J	AY.91	B.1.617.2.91	21J	Delta	21J (Delta)
hCoV-19/South_Africa/NICD-N12725/2021|EPI_ISL_3451285|2021-07-16	21J	AY.45	B.1.617.2.45	21J	Delta	21J (Delta)
hCoV-19/South_Africa/NICD-N12722/2021|EPI_ISL_3451282|2021-07-12	21J	AY.45	B.1.617.2.45	21J	Delta	21J (Delta)
hCoV-19/South_Africa/NICD-N12737/2021|EPI_ISL_3451297|2021-07-15	21J	AY.45	B.1.617.2.45	21J	Delta	21J (Delta)
hCoV-19/South_Africa/NICD-N12732/2021|EPI_ISL_3451292|2021-07-17	21J	AY.91	B.1.617.2.91	21J	Delta	21J (Delta)
hCoV-19/South_Africa/NICD-N12730/2021|EPI_ISL_3451290|2021-07-15	21J	AY.116	B.1.617.2.116	21J	Delta	21J (Delta)
hCoV-19/South_Africa/NICD-N12731/2021|EPI_ISL_3451291|2021-07-15	21J	AY.45	B.1.617.2.45	21J	Delta	21J (Delta)
hCoV-19/Reunion/HCL021139968101/2021|EPI_ISL_3472742|2021-07-20	20H	B.1.351	B.1.351	20H	Beta	20H (Beta, V2)
hCoV-19/Reunion/HCL021140051301/2021|EPI_ISL_3472804|2021-07-20	20H	B.1.351.2	B.1.351.2	20H	Beta	20H (Beta, V2)
hCoV-19/Reunion/HCL021140086201/2021|EPI_ISL_3472809|2021-07-20	20H	B.1.351.2	B.1.351.2	20H	Beta	20H (Beta, V2)
hCoV-19/Reunion/HCL021140081901/2021|EPI_ISL_3472806|2021-07-20	20H	B.1.351.2	B.1.351.2	20H	Beta	20H (Beta, V2)
hCoV-19/Reunion/HCL021140031001/2021|EPI_ISL_3472745|2021-07-20	20H	B.1.351	B.1.351	20H	Beta	20H (Beta, V2)
hCoV-19/Reunion/HCL021140079901/2021|EPI_ISL_3472747|2021-07-20	20H	B.1.351	B.1.351	20H	Beta	20H (Beta, V2)
hCoV-19/Reunion/HCL021140029601/2021|EPI_ISL_3472801|2021-07-20	20H	B.1.351.2	B.1.351.2	20H	Beta	20H (Beta, V2)
hCoV-19/Reunion/HCL021139976101/2021|EPI_ISL_3472811|2021-07-20	21J	AY.101	B.1.617.2.101	21J	Delta	21J (Delta)
hCoV-19/Reunion/HCL021140081501/2021|EPI_ISL_3473008|2021-07-20	21A	AY.40	B.1.617.2.40	21A	Delta	21A (Delta)
hCoV-19/Reunion/HCL021140081201/2021|EPI_ISL_3473007|2021-07-20	21A	AY.40	B.1.617.2.40	21A	Delta	21A (Delta)
hCoV-19/Reunion/HCL021140085401/2021|EPI_ISL_3473011|2021-07-20	21A	AY.40	B.1.617.2.40	21A	Delta	21A (Delta)
hCoV-19/Reunion/HCL021140084001/2021|EPI_ISL_3473010|2021-07-20	21A	AY.40	B.1.617.2.40	21A	Delta	21A (Delta)
hCoV-19/Reunion/HCL021139134401/2021|EPI_ISL_3472567|2021-07-20	21A	AY.40	B.1.617.2.40	21A	Delta	21A (Delta)
hCoV-19/Reunion/HCL021140034101/2021|EPI_ISL_3472994|2021-07-20	21A	AY.40	B.1.617.2.40	21A	Delta	21A (Delta)
hCoV-19/Reunion/HCL021140033101/2021|EPI_ISL_3472991|2021-07-20	21A	AY.40	B.1.617.2.40	21A	Delta	21A (Delta)
hCoV-19/Reunion/HCL021139981601/2021|EPI_ISL_3472970|2021-07-20	21A	AY.40	B.1.617.2.40	21A	Delta	21A (Delta)
hCoV-19/Reunion/HCL021139973001/2021|EPI_ISL_3472967|2021-07-20	21A	AY.40	B.1.617.2.40	21A	Delta	21A (Delta)
hCoV-19/South_Africa/NICD-N13573/2021|EPI_ISL_4030019|2021-07-22	20H	B.1.351	B.1.351	20H	Beta	20H (Beta, V2)
hCoV-19/South_Africa/NHLS-UCT-LA-Z579/2021|EPI_ISL_3506552|2021-07-21	21J	AY.32	B.1.617.2.32	21J	Delta	21J (Delta)
hCoV-19/South_Africa/NHLS-UCT-GS-E106/2021|EPI_ISL_3506487|2021-07-13	21J	AY.45	B.1.617.2.45	21J	Delta	21J (Delta)
hCoV-19/South_Africa/NHLS-UCT-GS-E010/2021|EPI_ISL_3506486|2021-07-15	21J	AY.32	B.1.617.2.32	21J	Delta	21J (Delta)
hCoV-19/South_Africa/NHLS-UCT-GS-D923/2021|EPI_ISL_3506485|2021-07-14	21J	AY.32	B.1.617.2.32	21J	Delta	21J (Delta)
hCoV-19/South_Africa/NHLS-UCT-GS-D909/2021|EPI_ISL_3506484|2021-07-14	21J	AY.6	B.1.617.2.6	21J	Delta	21J (Delta)
hCoV-19/South_Africa/NHLS-UCT-LA-Z562/2021|EPI_ISL_3506481|2021-07-14	21J	AY.32	B.1.617.2.32	21J	Delta	21J (Delta)
hCoV-19/South_Africa/NHLS-UCT-GS-E129/2021|EPI_ISL_3506480|2021-07-15	21J	AY.32	B.1.617.2.32	21J	Delta	21J (Delta)
hCoV-19/South_Africa/NHLS-UCT-GS-E012/2021|EPI_ISL_3506474|2021-07-15	21J	AY.45	B.1.617.2.45	21J	Delta	21J (Delta)
hCoV-19/South_Africa/NHLS-UCT-GS-D948/2021|EPI_ISL_3506473|2021-07-14	21J	AY.91	B.1.617.2.91	21J	Delta	21J (Delta)
hCoV-19/South_Africa/NHLS-UCT-GS-D730/2021|EPI_ISL_3506472|2021-07-12	21J	AY.45	B.1.617.2.45	21J	Delta	21J (Delta)
hCoV-19/South_Africa/NHLS-UCT-GS-D781/2021|EPI_ISL_3506479|2021-07-13	21J	AY.91	B.1.617.2.91	21J	Delta	21J (Delta)
hCoV-19/South_Africa/NHLS-UCT-GS-E090/2021|EPI_ISL_3506494|2021-07-16	21J	AY.32	B.1.617.2.32	21J	Delta	21J (Delta)
hCoV-19/South_Africa/NHLS-UCT-GS-D705/2021|EPI_ISL_3506493|2021-07-12	21J	AY.32	B.1.617.2.32	21J	Delta	21J (Delta)
hCoV-19/South_Africa/NHLS-UCT-LA-Z560/2021|EPI_ISL_3506490|2021-07-14	21J	AY.32	B.1.617.2.32	21J	Delta	21J (Delta)
hCoV-19/South_Africa/NHLS-UCT-GS-E169/2021|EPI_ISL_3506521|2021-07-19	21J	AY.107	B.1.617.2.107	21J	Delta	21J (Delta)
hCoV-19/South_Africa/NHLS-UCT-GS-E168/2021|EPI_ISL_3506520|2021-07-16	21J	AY.45	B.1.617.2.45	21J	Delta	21J (Delta)
hCoV-19/South_Africa/NHLS-UCT-GS-E183/2021|EPI_ISL_3506529|2021-07-20	21J	AY.45	B.1.617.2.45	21J	Delta	21J (Delta)
hCoV-19/South_Africa/NHLS-UCT-GS-E181/2021|EPI_ISL_3506528|2021-07-19	21J	AY.25	B.1.617.2.25	21J	Delta	21J (Delta)
hCoV-19/South_Africa/NHLS-UCT-GS-E180/2021|EPI_ISL_3506527|2021-07-20	21J	AY.45	B.1.617.2.45	21J	Delta	21J (Delta)
hCoV-19/South_Africa/NHLS-UCT-GS-E176/2021|EPI_ISL_3506525|2021-07-20	21J	AY.45	B.1.617.2.45	21J	Delta	21J (Delta)
hCoV-19/South_Africa/NHLS-UCT-GS-E175/2021|EPI_ISL_3506524|2021-07-19	21J	AY.45	B.1.617.2.45	21J	Delta	21J (Delta)
hCoV-19/South_Africa/NHLS-UCT-GS-E089/2021|EPI_ISL_3506519|2021-07-16	21J	AY.91	B.1.617.2.91	21J	Delta	21J (Delta)
hCoV-19/South_Africa/NHLS-UCT-GS-D999/2021|EPI_ISL_3506518|2021-07-15	21J	AY.32	B.1.617.2.32	21J	Delta	21J (Delta)
hCoV-19/South_Africa/NHLS-UCT-GS-D897/2021|EPI_ISL_3506516|2021-07-14	21J	AY.32	B.1.617.2.32	21J	Delta	21J (Delta)
hCoV-19/South_Africa/NHLS-UCT-GS-D858/2021|EPI_ISL_3506512|2021-07-13	21J	AY.32	B.1.617.2.32	21J	Delta	21J (Delta)
hCoV-19/South_Africa/NHLS-UCT-LA-Z565/2021|EPI_ISL_3506542|2021-07-21	21J	AY.32	B.1.617.2.32	21J	Delta	21J (Delta)
hCoV-19/South_Africa/NHLS-UCT-GS-E187/2021|EPI_ISL_3506533|2021-07-21	21J	AY.120.2	B.1.617.2.120.2	21J	Delta	21J (Delta)
hCoV-19/South_Africa/NHLS-UCT-GS-E186/2021|EPI_ISL_3506532|2021-07-20	21J	AY.45	B.1.617.2.45	21J	Delta	21J (Delta)
hCoV-19/South_Africa/NHLS-UCT-GS-E185/2021|EPI_ISL_3506531|2021-07-21	21J	AY.45	B.1.617.2.45	21J	Delta	21J (Delta)
hCoV-19/South_Africa/NHLS-UCT-GS-E184/2021|EPI_ISL_3506530|2021-07-20	21J	AY.45	B.1.617.2.45	21J	Delta	21J (Delta)
hCoV-19/South_Africa/NHLS-UCT-LA-Z552/2021|EPI_ISL_3506539|2021-07-14	21J	AY.32	B.1.617.2.32	21J	Delta	21J (Delta)
hCoV-19/South_Africa/NHLS-UCT-GS-E192/2021|EPI_ISL_3506538|2021-07-21	21J	AY.45	B.1.617.2.45	21J	Delta	21J (Delta)
hCoV-19/South_Africa/NHLS-UCT-GS-E191/2021|EPI_ISL_3506537|2021-07-22	21J	AY.45	B.1.617.2.45	21J	Delta	21J (Delta)
hCoV-19/South_Africa/NHLS-UCT-GS-E190/2021|EPI_ISL_3506536|2021-07-22	21J	AY.45	B.1.617.2.45	21J	Delta	21J (Delta)
hCoV-19/South_Africa/NHLS-UCT-GS-E189/2021|EPI_ISL_3506535|2021-07-22	21J	AY.45	B.1.617.2.45	21J	Delta	21J (Delta)
hCoV-19/South_Africa/NHLS-UCT-GS-E188/2021|EPI_ISL_3506534|2021-07-21	21J	AY.45	B.1.617.2.45	21J	Delta	21J (Delta)
hCoV-19/South_Africa/NHLS-UCT-GS-E179/2021|EPI_ISL_3506425|2021-07-19	21J	AY.45	B.1.617.2.45	21J	Delta	21J (Delta)
hCoV-19/Uganda/UG679/2021|EPI_ISL_3546305|2021-07-15	21J	AY.46	B.1.617.2.46	21J	Delta	21J (Delta)
hCoV-19/Uganda/UG677/2021|EPI_ISL_3546303|2021-07-13	21J	AY.46	B.1.617.2.46	21J	Delta	21J (Delta)
hCoV-19/Uganda/UG676/2021|EPI_ISL_3546302|2021-07-13	21J	AY.46	B.1.617.2.46	21J	Delta	21J (Delta)
hCoV-19/Uganda/UG683/2021|EPI_ISL_3546309|2021-07-14	21J	AY.46	B.1.617.2.46	21J	Delta	21J (Delta)
hCoV-19/South_Sudan/UG708/2021|EPI_ISL_3546345|2021-07-17	21J	AY.46.4	B.1.617.2.46.4	21J	Delta	21J (Delta)
hCoV-19/South_Sudan/UG696/2021|EPI_ISL_3546335|2021-07-14	21A	AY.16	B.1.617.2.16	21A	Delta	21A (Delta)
hCoV-19/South_Sudan/UG694/2021|EPI_ISL_3546333|2021-07-20	21J	AY.46	B.1.617.2.46	21J	Delta	21J (Delta)
hCoV-19/Uganda/UG698/2021|EPI_ISL_3546311|2021-07-18	21J	AY.46.4	B.1.617.2.46.4	21J	Delta	21J (Delta)
hCoV-19/Uganda/UG684/2021|EPI_ISL_3546310|2021-07-15	21J	AY.46	B.1.617.2.46	21J	Delta	21J (Delta)
hCoV-19/South_Africa/NICD-N17184/2021|EPI_ISL_5477246|2021-07-22	21J	AY.45	B.1.617.2.45	21J	Delta	21J (Delta)
hCoV-19/Reunion/HCL021141124101/2021|EPI_ISL_3633871|2021-07-20	21J	AY.34	B.1.617.2.34	21J	Delta	21J (Delta)
hCoV-19/South_Africa/NHLS-UCT-GS-D779/2021|EPI_ISL_3506511|2021-07-12	21J	AY.45	B.1.617.2.45	21J	Delta	21J (Delta)
hCoV-19/Reunion/HCL021142428501/2021|EPI_ISL_3633644|2021-07-20	21A	AY.40	B.1.617.2.40	21A	Delta	21A (Delta)
hCoV-19/Reunion/HCL021142443701/2021|EPI_ISL_3633654|2021-07-20	21J	AY.98.1	B.1.617.2.98.1	21J	Delta	21J (Delta)
hCoV-19/Reunion/HCL021141107401/2021|EPI_ISL_3632866|2021-07-20	21J	AY.122	B.1.617.2.122	21J	Delta	21J (Delta)
hCoV-19/Reunion/HCL021141111101/2021|EPI_ISL_3632868|2021-07-20	21A	AY.40	B.1.617.2.40	21A	Delta	21A (Delta)
hCoV-19/Reunion/HCL021141112101/2021|EPI_ISL_3632870|2021-07-20	21A	AY.40	B.1.617.2.40	21A	Delta	21A (Delta)
hCoV-19/Reunion/HCL021141125501/2021|EPI_ISL_3632871|2021-07-20	21A	AY.40	B.1.617.2.40	21A	Delta	21A (Delta)
hCoV-19/Reunion/HCL021141566601/2021|EPI_ISL_3633985|2021-07-20	20H	B.1.351	B.1.351	20H	Beta	20H (Beta, V2)
hCoV-19/Reunion/HCL021142449501/2021|EPI_ISL_3633984|2021-07-20	20H	B.1.351	B.1.351	20H	Beta	20H (Beta, V2)
hCoV-19/Reunion/HCL021141572701/2021|EPI_ISL_3633986|2021-07-20	20H	B.1.351	B.1.351	20H	Beta	20H (Beta, V2)
hCoV-19/Reunion/HCL021142402601/2021|EPI_ISL_3633809|2021-07-20	20H	B.1.351.2	B.1.351.2	20H	Beta	20H (Beta, V2)
hCoV-19/Reunion/HCL021142434001/2021|EPI_ISL_3633811|2021-07-20	20H	B.1.351.2	B.1.351.2	20H	Beta	20H (Beta, V2)
hCoV-19/Reunion/HCL021141572101/2021|EPI_ISL_3633791|2021-07-20	21A	AY.40	B.1.617.2.40	21A	Delta	21A (Delta)
hCoV-19/Reunion/HCL021141571101/2021|EPI_ISL_3633798|2021-07-20	21A	AY.40	B.1.617.2.40	21A	Delta	21A (Delta)
hCoV-19/Reunion/HCL021141569201/2021|EPI_ISL_3633794|2021-07-20	21A	AY.40	B.1.617.2.40	21A	Delta	21A (Delta)
hCoV-19/Reunion/HCL021141573201/2021|EPI_ISL_3633796|2021-07-20	21A	AY.40	B.1.617.2.40	21A	Delta	21A (Delta)
hCoV-19/Reunion/HCL021141570101/2021|EPI_ISL_3633787|2021-07-20	21A	AY.40	B.1.617.2.40	21A	Delta	21A (Delta)
hCoV-19/Reunion/HCL021141565901/2021|EPI_ISL_3633789|2021-07-20	21A	AY.40	B.1.617.2.40	21A	Delta	21A (Delta)
hCoV-19/Reunion/HCL021141568401/2021|EPI_ISL_3633784|2021-07-20	21A	AY.40	B.1.617.2.40	21A	Delta	21A (Delta)
hCoV-19/South_Africa/NICD-N13046/2021|EPI_ISL_3451358|2021-07-16	20D	C.1.2	B.1.1.1.1.2	20D	unassigned	20D
hCoV-19/South_Africa/NICD-N13206/2021|EPI_ISL_3643879|2021-07-15	21J	AY.45	B.1.617.2.45	21J	Delta	21J (Delta)
hCoV-19/South_Africa/NICD-N13644/2021|EPI_ISL_3644003|2021-07-13	21J	AY.45	B.1.617.2.45	21J	Delta	21J (Delta)
hCoV-19/South_Africa/NICD-N13312/2021|EPI_ISL_3644002|2021-07-19	21J	AY.45	B.1.617.2.45	21J	Delta	21J (Delta)
hCoV-19/South_Africa/NICD-N13311/2021|EPI_ISL_3644001|2021-07-20	21J	AY.45	B.1.617.2.45	21J	Delta	21J (Delta)
hCoV-19/South_Africa/NICD-N13216/2021|EPI_ISL_3644000|2021-07-15	21J	AY.45	B.1.617.2.45	21J	Delta	21J (Delta)
hCoV-19/Mauritius/298327/2021|EPI_ISL_5260424|2021-07-16	21J	B.1.617.2	B.1.617.2	21J	Delta	21J (Delta)
hCoV-19/Ghana/WACCBIP-GS1080/2021|EPI_ISL_3268191|2021-07-13	21A	B.1.617.2	B.1.617.2	21A	Delta	21A (Delta)
hCoV-19/South_Africa/NICD-R10870/2021|EPI_ISL_3219899|2021-07-21	21I	B.1.617.2	B.1.617.2	21I	Delta	21I (Delta)
hCoV-19/South_Africa/NICD-N13306/2021|EPI_ISL_3643968|2021-07-20	21I	B.1.617.2	B.1.617.2	21I	Delta	21I (Delta)
hCoV-19/South_Africa/NICD-N13307/2021|EPI_ISL_3643962|2021-07-20	21I	B.1.617.2	B.1.617.2	21I	Delta	21I (Delta)
hCoV-19/South_Africa/NICD-N13205/2021|EPI_ISL_3643946|2021-07-15	21J	AY.122	B.1.617.2.122	21J	Delta	21J (Delta)
hCoV-19/South_Africa/NICD-N13218/2021|EPI_ISL_3643948|2021-07-15	21J	AY.45	B.1.617.2.45	21J	Delta	21J (Delta)
hCoV-19/South_Africa/NICD-N13217/2021|EPI_ISL_3643947|2021-07-14	21J	AY.45	B.1.617.2.45	21J	Delta	21J (Delta)
hCoV-19/South_Africa/NICD-N13214/2021|EPI_ISL_3643999|2021-07-15	21J	AY.45	B.1.617.2.45	21J	Delta	21J (Delta)
hCoV-19/South_Africa/NICD-N13209/2021|EPI_ISL_3643998|2021-07-15	21J	AY.45	B.1.617.2.45	21J	Delta	21J (Delta)
hCoV-19/South_Africa/NICD-N12881/2021|EPI_ISL_3643991|2021-07-19	21J	AY.99	B.1.617.2.99	21J	Delta	21J (Delta)
hCoV-19/South_Africa/NICD-N12880/2021|EPI_ISL_3643990|2021-07-14	21J	AY.95	B.1.617.2.95	21J	Delta	21J (Delta)
hCoV-19/South_Africa/NICD-N13203/2021|EPI_ISL_3643997|2021-07-15	21J	AY.91	B.1.617.2.91	21J	Delta	21J (Delta)
hCoV-19/South_Africa/NICD-N13202/2021|EPI_ISL_3643996|2021-07-12	21J	AY.45	B.1.617.2.45	21J	Delta	21J (Delta)
hCoV-19/South_Africa/NICD-N13161/2021|EPI_ISL_3643993|2021-07-18	21J	AY.45	B.1.617.2.45	21J	Delta	21J (Delta)
hCoV-19/South_Africa/KRISP-K021077/2021|EPI_ISL_3663522|2021-07-20	21J	AY.45	B.1.617.2.45	21J	Delta	21J (Delta)
hCoV-19/South_Africa/KRISP-K021078/2021|EPI_ISL_3663523|2021-07-22	21J	AY.45	B.1.617.2.45	21J	Delta	21J (Delta)
hCoV-19/South_Africa/KRISP-K021092/2021|EPI_ISL_3663530|2021-07-20	21J	AY.45	B.1.617.2.45	21J	Delta	21J (Delta)
hCoV-19/South_Africa/KRISP-K021107/2021|EPI_ISL_3663539|2021-07-20	20D	C.1.2	B.1.1.1.1.2	20D	unassigned	20D
hCoV-19/South_Africa/KRISP-K021098/2021|EPI_ISL_3663534|2021-07-20	21J	AY.45	B.1.617.2.45	21J	Delta	21J (Delta)
hCoV-19/South_Africa/NICD-N13633/2021|EPI_ISL_3838475|2021-07-20	21J	AY.45	B.1.617.2.45	21J	Delta	21J (Delta)
hCoV-19/South_Africa/NICD-N14500/2021|EPI_ISL_3838584|2021-07-14	21J	AY.45	B.1.617.2.45	21J	Delta	21J (Delta)
hCoV-19/South_Africa/NICD-N14159/2021|EPI_ISL_3838640|2021-07-12	21J	AY.45	B.1.617.2.45	21J	Delta	21J (Delta)
hCoV-19/Namibia/CERI-KRISP-K022559/2021|EPI_ISL_5327941|2021-07-12	21J	AY.91	B.1.617.2.91	21J	Delta	21J (Delta)
hCoV-19/Namibia/CERI-KRISP-K022554/2021|EPI_ISL_5327934|2021-07-12	21J	AY.91	B.1.617.2.91	21J	Delta	21J (Delta)
hCoV-19/Namibia/CERI-KRISP-K022548/2021|EPI_ISL_5327928|2021-07-12	21J	AY.91	B.1.617.2.91	21J	Delta	21J (Delta)
hCoV-19/Namibia/CERI-KRISP-K022547/2021|EPI_ISL_5327927|2021-07-12	21J	AY.91	B.1.617.2.91	21J	Delta	21J (Delta)
hCoV-19/Namibia/CERI-KRISP-K022575/2021|EPI_ISL_5327955|2021-07-12	21J	AY.91	B.1.617.2.91	21J	Delta	21J (Delta)
hCoV-19/Namibia/CERI-KRISP-K022574/2021|EPI_ISL_5327954|2021-07-12	21J	AY.91	B.1.617.2.91	21J	Delta	21J (Delta)
hCoV-19/Namibia/CERI-KRISP-K022562/2021|EPI_ISL_5327944|2021-07-13	21J	AY.91	B.1.617.2.91	21J	Delta	21J (Delta)
hCoV-19/Namibia/CERI-KRISP-K022563/2021|EPI_ISL_5327945|2021-07-12	21J	AY.91	B.1.617.2.91	21J	Delta	21J (Delta)
hCoV-19/South_Africa/NHLS-UCT-GS-E799/2021|EPI_ISL_3690614|2021-07-22	21J	AY.45	B.1.617.2.45	21J	Delta	21J (Delta)
hCoV-19/South_Africa/NHLS-UCT-LA-Z602/2021|EPI_ISL_3690615|2021-07-21	21J	AY.107	B.1.617.2.107	21J	Delta	21J (Delta)
hCoV-19/South_Africa/NHLS-UCT-LA-Z603/2021|EPI_ISL_3690616|2021-07-21	21J	AY.32	B.1.617.2.32	21J	Delta	21J (Delta)
hCoV-19/South_Africa/NHLS-UCT-GS-E370/2021|EPI_ISL_3690617|2021-07-20	21I	B.1.617.2	B.1.617.2	21I	Delta	21I (Delta)
hCoV-19/South_Africa/NHLS-UCT-GS-E638/2021|EPI_ISL_3690618|2021-07-19	21J	AY.45	B.1.617.2.45	21J	Delta	21J (Delta)
hCoV-19/South_Africa/NHLS-UCT-GS-E206/2021|EPI_ISL_3690619|2021-07-16	21J	AY.99	B.1.617.2.99	21J	Delta	21J (Delta)
hCoV-19/South_Africa/NHLS-UCT-GS-E335/2021|EPI_ISL_3690579|2021-07-19	21J	AY.91	B.1.617.2.91	21J	Delta	21J (Delta)
hCoV-19/South_Africa/NHLS-UCT-LA-Z600/2021|EPI_ISL_3690557|2021-07-19	20I	B.1.1.7	B.1.1.7	20I	Alpha	20I (Alpha, V1)
hCoV-19/Namibia/CERI-KRISP-K022551/2021|EPI_ISL_5327931|2021-07-12	21J	AY.91	B.1.617.2.91	21J	Delta	21J (Delta)
hCoV-19/Namibia/CERI-KRISP-K022549/2021|EPI_ISL_5327929|2021-07-12	21J	AY.91	B.1.617.2.91	21J	Delta	21J (Delta)
hCoV-19/Namibia/CERI-KRISP-K022576/2021|EPI_ISL_5327956|2021-07-12	21J	AY.91	B.1.617.2.91	21J	Delta	21J (Delta)
hCoV-19/Namibia/CERI-KRISP-K022573/2021|EPI_ISL_5327953|2021-07-12	21J	AY.91	B.1.617.2.91	21J	Delta	21J (Delta)
hCoV-19/Namibia/CERI-KRISP-K022570/2021|EPI_ISL_5327951|2021-07-12	21J	AY.91	B.1.617.2.91	21J	Delta	21J (Delta)
hCoV-19/Namibia/CERI-KRISP-K022571/2021|EPI_ISL_5327952|2021-07-12	21J	AY.91	B.1.617.2.91	21J	Delta	21J (Delta)
hCoV-19/Namibia/CERI-KRISP-K022568/2021|EPI_ISL_5327949|2021-07-12	21J	AY.91	B.1.617.2.91	21J	Delta	21J (Delta)
hCoV-19/South_Africa/NHLS-UCT-LA-Z581/2021|EPI_ISL_3506554|2021-07-21	21J	AY.32	B.1.617.2.32	21J	Delta	21J (Delta)
hCoV-19/South_Africa/NICD-N12987/2021|EPI_ISL_3411673|2021-07-15	21J	AY.120.2	B.1.617.2.120.2	21J	Delta	21J (Delta)
hCoV-19/South_Africa/NICD-N14154/2021|EPI_ISL_3717993|2021-07-19	20D	C.1.2	B.1.1.1.1.2	20D	unassigned	20D
hCoV-19/South_Africa/NICD-N15253/2021|EPI_ISL_5416411|2021-07-19	21J	AY.45	B.1.617.2.45	21J	Delta	21J (Delta)
hCoV-19/South_Africa/NICD-N15252/2021|EPI_ISL_5416410|2021-07-19	21J	AY.45	B.1.617.2.45	21J	Delta	21J (Delta)
hCoV-19/South_Africa/NICD-N14135/2021|EPI_ISL_3718000|2021-07-20	20D	C.1.2	B.1.1.1.1.2	20D	unassigned	20D
hCoV-19/South_Africa/NICD-N14126/2021|EPI_ISL_3718040|2021-07-20	21J	AY.45	B.1.617.2.45	21J	Delta	21J (Delta)
hCoV-19/South_Africa/NICD-N14132/2021|EPI_ISL_3718041|2021-07-21	21A	AY.19	B.1.617.2.19	21A	Delta	21A (Delta)
hCoV-19/South_Africa/NICD-N13618/2021|EPI_ISL_3718035|2021-07-20	21J	AY.45	B.1.617.2.45	21J	Delta	21J (Delta)
hCoV-19/South_Africa/NICD-N13628/2021|EPI_ISL_3718037|2021-07-20	21J	AY.45	B.1.617.2.45	21J	Delta	21J (Delta)
hCoV-19/Ethiopia/CERI-KRISP-K025760/2021|EPI_ISL_5425654|2021-07-12	20A	B.1	B.1	20A	unassigned	20A
hCoV-19/Ethiopia/CERI-KRISP-K025762/2021|EPI_ISL_5425644|2021-07-15	20A	B.1	B.1	20A	unassigned	20A
hCoV-19/Ethiopia/CERI-KRISP-K025777/2021|EPI_ISL_5425645|2021-07-12	20A	B.1	B.1	20A	unassigned	20A
hCoV-19/Ethiopia/CERI-KRISP-K025770/2021|EPI_ISL_5425634|2021-07-13	20A	B.1.480	B.1.480	20A	unassigned	20A
hCoV-19/Ethiopia/CERI-KRISP-K025640/2021|EPI_ISL_5429019|2021-07-14	20A	B.1.480	B.1.480	20A	unassigned	20A
hCoV-19/Ethiopia/CERI-KRISP-K025614/2021|EPI_ISL_5429015|2021-07-13	20A	B.1.480	B.1.480	20A	unassigned	20A
hCoV-19/Ethiopia/CERI-KRISP-K025616/2021|EPI_ISL_5429016|2021-07-14	20A	B.1.480	B.1.480	20A	unassigned	20A
hCoV-19/Ethiopia/CERI-KRISP-K025637/2021|EPI_ISL_5429018|2021-07-14	20A	B.1.480	B.1.480	20A	unassigned	20A
hCoV-19/South_Africa/KRISP-K021290/2021|EPI_ISL_3722255|2021-07-20	20I	B.1.1.7	B.1.1.7	20I	Alpha	20I (Alpha, V1)
hCoV-19/South_Africa/NICD-N17162/2021|EPI_ISL_5477469|2021-07-20	21I	B.1.617.2	B.1.617.2	21I	Delta	21I (Delta)
hCoV-19/South_Africa/NICD-N17129/2021|EPI_ISL_5477457|2021-07-21	21I	B.1.617.2	B.1.617.2	21I	Delta	21I (Delta)
hCoV-19/South_Africa/NICD-N17183/2021|EPI_ISL_5477481|2021-07-22	21I	B.1.617.2	B.1.617.2	21I	Delta	21I (Delta)
hCoV-19/South_Africa/NICD-N17182/2021|EPI_ISL_5477474|2021-07-22	21I	B.1.617.2	B.1.617.2	21I	Delta	21I (Delta)
hCoV-19/South_Africa/NICD-N17120/2021|EPI_ISL_5477438|2021-07-22	21I	B.1.617.2	B.1.617.2	21I	Delta	21I (Delta)
hCoV-19/South_Africa/NICD-N17135/2021|EPI_ISL_5477066|2021-07-20	21J	AY.45	B.1.617.2.45	21J	Delta	21J (Delta)
hCoV-19/South_Africa/NICD-N17128/2021|EPI_ISL_5477051|2021-07-21	21J	AY.99	B.1.617.2.99	21J	Delta	21J (Delta)
hCoV-19/South_Africa/NICD-N17136/2021|EPI_ISL_5477071|2021-07-21	21J	AY.45	B.1.617.2.45	21J	Delta	21J (Delta)
hCoV-19/South_Africa/NICD-N17173/2021|EPI_ISL_5477093|2021-07-21	21J	AY.45	B.1.617.2.45	21J	Delta	21J (Delta)
hCoV-19/South_Africa/NICD-N17180/2021|EPI_ISL_5477109|2021-07-22	21J	AY.45	B.1.617.2.45	21J	Delta	21J (Delta)
hCoV-19/South_Africa/NICD-N17118/2021|EPI_ISL_5477027|2021-07-22	21J	AY.45	B.1.617.2.45	21J	Delta	21J (Delta)
hCoV-19/South_Africa/NICD-N17115/2021|EPI_ISL_5477020|2021-07-22	21J	AY.45	B.1.617.2.45	21J	Delta	21J (Delta)
hCoV-19/South_Africa/NICD-N17113/2021|EPI_ISL_5477012|2021-07-22	21J	AY.45	B.1.617.2.45	21J	Delta	21J (Delta)
hCoV-19/South_Africa/NICD-N17125/2021|EPI_ISL_5477040|2021-07-22	21J	AY.45	B.1.617.2.45	21J	Delta	21J (Delta)
hCoV-19/South_Africa/NICD-N17122/2021|EPI_ISL_5477033|2021-07-20	21J	AY.45	B.1.617.2.45	21J	Delta	21J (Delta)
hCoV-19/South_Africa/NICD-N13562/2021|EPI_ISL_4030048|2021-07-22	21J	AY.45	B.1.617.2.45	21J	Delta	21J (Delta)
hCoV-19/South_Africa/NICD-N12818/2021|EPI_ISL_5510300|2021-07-16	21I	B.1.617.2	B.1.617.2	21I	Delta	21I (Delta)
hCoV-19/South_Africa/NICD-N13251/2021|EPI_ISL_5510278|2021-07-15	21J	AY.45	B.1.617.2.45	21J	Delta	21J (Delta)
hCoV-19/Botswana/R36B50_BHP_AAB98014/2021|EPI_ISL_5503095|2021-07-14	20H	B.1.351	B.1.351	20H	Beta	20H (Beta, V2)
hCoV-19/Botswana/R36B38_BHP_AAB98002/2021|EPI_ISL_5503083|2021-07-14	21J	AY.45	B.1.617.2.45	21J	Delta	21J (Delta)
hCoV-19/Botswana/R36B45_BHP_AAB98009/2021|EPI_ISL_5503088|2021-07-14	21J	AY.45	B.1.617.2.45	21J	Delta	21J (Delta)
hCoV-19/South_Africa/NICD-N13237/2021|EPI_ISL_5510299|2021-07-20	21I	B.1.617.2	B.1.617.2	21I	Delta	21I (Delta)
hCoV-19/South_Africa/VIDA-KRISP-K020447/2021|EPI_ISL_3729016|2021-07-13	21J	AY.45	B.1.617.2.45	21J	Delta	21J (Delta)
hCoV-19/South_Africa/VIDA-KRISP-K020459/2021|EPI_ISL_3729032|2021-07-16	21I	AY.38	B.1.617.2.38	21I	Delta	21I (Delta)
hCoV-19/South_Africa/VIDA-KRISP-K020456/2021|EPI_ISL_3729021|2021-07-15	21I	AY.38	B.1.617.2.38	21I	Delta	21I (Delta)
hCoV-19/South_Africa/VIDA-KRISP-K020457/2021|EPI_ISL_3729024|2021-07-21	21J	AY.45	B.1.617.2.45	21J	Delta	21J (Delta)
hCoV-19/South_Africa/VIDA-KRISP-K020448/2021|EPI_ISL_3729076|2021-07-12	21J	AY.45	B.1.617.2.45	21J	Delta	21J (Delta)
hCoV-19/Zimbabwe/CERI-KRISP-K021500/2021|EPI_ISL_3730477|2021-07-15	21J	B.1.617.2	B.1.617.2	21J	Delta	21J (Delta)
hCoV-19/Gambia/51435/2021|EPI_ISL_5641055|2021-07-16	21I	B.1.617.2	B.1.617.2	21I	Delta	21I (Delta)
hCoV-19/South_Africa/KRISP-K021927/2021|EPI_ISL_3799173|2021-07-18	21J	AY.45	B.1.617.2.45	21J	Delta	21J (Delta)
hCoV-19/South_Africa/KRISP-K021920/2021|EPI_ISL_3799172|2021-07-18	21J	AY.45	B.1.617.2.45	21J	Delta	21J (Delta)
hCoV-19/South_Africa/KRISP-K021932/2021|EPI_ISL_3799175|2021-07-19	21J	AY.45	B.1.617.2.45	21J	Delta	21J (Delta)
hCoV-19/South_Africa/KRISP-K021928/2021|EPI_ISL_3799174|2021-07-18	21J	AY.45	B.1.617.2.45	21J	Delta	21J (Delta)
hCoV-19/South_Africa/NICD-N11796/2021|EPI_ISL_3838351|2021-07-12	21J	AY.45	B.1.617.2.45	21J	Delta	21J (Delta)
hCoV-19/South_Africa/NICD-N11794/2021|EPI_ISL_3838349|2021-07-12	21J	AY.45	B.1.617.2.45	21J	Delta	21J (Delta)
hCoV-19/South_Africa/NICD-N11789/2021|EPI_ISL_3838344|2021-07-12	21J	AY.45	B.1.617.2.45	21J	Delta	21J (Delta)
hCoV-19/South_Africa/NICD-N11788/2021|EPI_ISL_3838343|2021-07-12	21J	AY.45	B.1.617.2.45	21J	Delta	21J (Delta)
hCoV-19/South_Africa/NICD-N11793/2021|EPI_ISL_3838348|2021-07-12	21J	AY.45	B.1.617.2.45	21J	Delta	21J (Delta)
hCoV-19/South_Africa/NICD-N11792/2021|EPI_ISL_3838347|2021-07-12	21J	AY.45	B.1.617.2.45	21J	Delta	21J (Delta)
hCoV-19/South_Africa/NICD-N11778/2021|EPI_ISL_3838334|2021-07-12	21J	AY.45	B.1.617.2.45	21J	Delta	21J (Delta)
hCoV-19/South_Africa/NICD-N13516/2021|EPI_ISL_3838473|2021-07-17	21J	AY.45	B.1.617.2.45	21J	Delta	21J (Delta)
hCoV-19/South_Africa/NICD-N13513/2021|EPI_ISL_3838470|2021-07-20	21J	AY.99	B.1.617.2.99	21J	Delta	21J (Delta)
hCoV-19/South_Africa/NICD-N13508/2021|EPI_ISL_3838465|2021-07-21	20I	B.1.1.7	B.1.1.7	20I	Alpha	20I (Alpha, V1)
hCoV-19/South_Africa/NICD-N13509/2021|EPI_ISL_3838466|2021-07-20	21J	AY.45	B.1.617.2.45	21J	Delta	21J (Delta)
hCoV-19/South_Africa/NICD-N13512/2021|EPI_ISL_3838469|2021-07-20	21J	AY.99	B.1.617.2.99	21J	Delta	21J (Delta)
hCoV-19/South_Africa/NICD-N13463/2021|EPI_ISL_3838443|2021-07-20	21J	AY.45	B.1.617.2.45	21J	Delta	21J (Delta)
hCoV-19/South_Africa/NICD-N13461/2021|EPI_ISL_3838442|2021-07-20	21J	AY.45	B.1.617.2.45	21J	Delta	21J (Delta)
hCoV-19/South_Africa/NICD-N13473/2021|EPI_ISL_3838445|2021-07-20	21J	AY.45	B.1.617.2.45	21J	Delta	21J (Delta)
hCoV-19/South_Africa/NICD-N13474/2021|EPI_ISL_3838446|2021-07-20	21J	AY.45	B.1.617.2.45	21J	Delta	21J (Delta)
hCoV-19/South_Africa/NICD-N11801/2021|EPI_ISL_3838356|2021-07-12	21J	AY.45	B.1.617.2.45	21J	Delta	21J (Delta)
hCoV-19/South_Africa/NICD-N11766/2021|EPI_ISL_3838322|2021-07-12	21J	AY.45	B.1.617.2.45	21J	Delta	21J (Delta)
hCoV-19/South_Africa/NICD-N13515/2021|EPI_ISL_3838472|2021-07-20	21J	AY.45	B.1.617.2.45	21J	Delta	21J (Delta)
hCoV-19/South_Africa/NICD-N13490/2021|EPI_ISL_3838452|2021-07-20	21J	AY.45	B.1.617.2.45	21J	Delta	21J (Delta)
hCoV-19/South_Africa/NICD-N13496/2021|EPI_ISL_3838456|2021-07-20	21J	AY.45	B.1.617.2.45	21J	Delta	21J (Delta)
hCoV-19/South_Africa/NICD-N13493/2021|EPI_ISL_3838455|2021-07-20	21J	AY.45	B.1.617.2.45	21J	Delta	21J (Delta)
hCoV-19/South_Africa/NICD-N13499/2021|EPI_ISL_3838458|2021-07-19	21J	AY.45	B.1.617.2.45	21J	Delta	21J (Delta)
hCoV-19/South_Africa/NICD-N14495/2021|EPI_ISL_3838579|2021-07-14	21I	B.1.617.2	B.1.617.2	21I	Delta	21I (Delta)
hCoV-19/South_Africa/NICD-N14258/2021|EPI_ISL_3838571|2021-07-18	21J	AY.32	B.1.617.2.32	21J	Delta	21J (Delta)
hCoV-19/South_Africa/NICD-N13772/2021|EPI_ISL_3838565|2021-07-22	21J	AY.45	B.1.617.2.45	21J	Delta	21J (Delta)
hCoV-19/South_Africa/NICD-N14076/2021|EPI_ISL_3838617|2021-07-17	21J	AY.45	B.1.617.2.45	21J	Delta	21J (Delta)
hCoV-19/South_Africa/NICD-N14063/2021|EPI_ISL_3838604|2021-07-16	21J	AY.45	B.1.617.2.45	21J	Delta	21J (Delta)
hCoV-19/South_Africa/KRISP-K021986/2021|EPI_ISL_3860154|2021-07-14	21A	B.1.617.2	B.1.617.2	21A	Delta	21A (Delta)
hCoV-19/Togo/NMIMR-21-TGS-365/2021|EPI_ISL_3915067|2021-07-12	20A	B.1	B.1	20A	unassigned	20A
hCoV-19/Togo/NMIMR-21-TGS-373/2021|EPI_ISL_3915072|2021-07-19	21J	AY.122	B.1.617.2.122	21J	Delta	21J (Delta)
hCoV-19/Togo/NMIMR-21-TGS-374/2021|EPI_ISL_3915073|2021-07-19	21J	AY.122	B.1.617.2.122	21J	Delta	21J (Delta)
hCoV-19/Togo/NMIMR-21-TGS-379/2021|EPI_ISL_3915078|2021-07-16	21J	AY.122	B.1.617.2.122	21J	Delta	21J (Delta)
hCoV-19/Togo/NMIMR-21-TGS-380/2021|EPI_ISL_3915079|2021-07-21	21J	AY.122	B.1.617.2.122	21J	Delta	21J (Delta)
hCoV-19/Togo/NMIMR-21-TGS-381/2021|EPI_ISL_3915080|2021-07-22	21A	B.1.617.2	B.1.617.2	21A	Delta	21A (Delta)
hCoV-19/Togo/NMIMR-21-TGS-383/2021|EPI_ISL_3915082|2021-07-22	21J	AY.36	B.1.617.2.36	21J	Delta	21J (Delta)
hCoV-19/Togo/NMIMR-21-TGS-436/2021|EPI_ISL_3915119|2021-07-22	21J	AY.122	B.1.617.2.122	21J	Delta	21J (Delta)
hCoV-19/Togo/NMIMR-21-TGS-434/2021|EPI_ISL_3915117|2021-07-18	21A	B.1.617.2	B.1.617.2	21A	Delta	21A (Delta)
hCoV-19/Togo/NMIMR-21-TGS-439/2021|EPI_ISL_3915121|2021-07-22	21A	B.1.617.2	B.1.617.2	21A	Delta	21A (Delta)
hCoV-19/South_Africa/NICD-N14985/2021|EPI_ISL_4891725|2021-07-20	21J	AY.45	B.1.617.2.45	21J	Delta	21J (Delta)
hCoV-19/South_Africa/NHLS-UCT-GS-E320/2021|EPI_ISL_3957817|2021-07-20	21I	B.1.617.2	B.1.617.2	21I	Delta	21I (Delta)
hCoV-19/South_Africa/NHLS-UCT-GS-E217/2021|EPI_ISL_3957814|2021-07-17	21I	B.1.617.2	B.1.617.2	21I	Delta	21I (Delta)
hCoV-19/South_Africa/NHLS-UCT-GS-E264/2021|EPI_ISL_3957816|2021-07-19	21J	AY.107	B.1.617.2.107	21J	Delta	21J (Delta)
hCoV-19/South_Africa/NHLS-UCT-GS-E263/2021|EPI_ISL_3957815|2021-07-19	21I	B.1.617.2	B.1.617.2	21I	Delta	21I (Delta)
hCoV-19/South_Africa/VIDA-KRISP-K020458/2021|EPI_ISL_3729028|2021-07-16	21A	AY.19	B.1.617.2.19	21A	Delta	21A (Delta)
hCoV-19/Ghana/UHAS-WA651/2021|EPI_ISL_3980520|2021-07-20	21J	AY.88	B.1.617.2.88	21J	Delta	21J (Delta)
hCoV-19/Ghana/UHAS-WA652/2021|EPI_ISL_3980521|2021-07-20	21A	B.1.617.2	B.1.617.2	21A	Delta	21A (Delta)
hCoV-19/Ghana/UHAS-WA732/2021|EPI_ISL_3980522|2021-07-22	21J	AY.88	B.1.617.2.88	21J	Delta	21J (Delta)
hCoV-19/Ghana/UHAS-WA766/2021|EPI_ISL_3980523|2021-07-22	21J	AY.88	B.1.617.2.88	21J	Delta	21J (Delta)
hCoV-19/Ghana/UHAS-WA773/2021|EPI_ISL_3980524|2021-07-22	21J	AY.88	B.1.617.2.88	21J	Delta	21J (Delta)
hCoV-19/Ghana/UHAS-AL062/2021|EPI_ISL_3980460|2021-07-22	21J	AY.88	B.1.617.2.88	21J	Delta	21J (Delta)
hCoV-19/Ghana/UHAS-AL063/2021|EPI_ISL_3980461|2021-07-22	21J	AY.88	B.1.617.2.88	21J	Delta	21J (Delta)
hCoV-19/Ghana/UHAS-AK809/2021|EPI_ISL_3980450|2021-07-19	21J	AY.88	B.1.617.2.88	21J	Delta	21J (Delta)
hCoV-19/Ghana/UHAS-AK931/2021|EPI_ISL_3980452|2021-07-19	21J	AY.88	B.1.617.2.88	21J	Delta	21J (Delta)
hCoV-19/Ghana/UHAS-AK939/2021|EPI_ISL_3980454|2021-07-19	21I	AY.37	B.1.617.2.37	21I	Delta	21I (Delta)
hCoV-19/Ghana/UHAS-AL039/2021|EPI_ISL_3980455|2021-07-22	21I	AY.37	B.1.617.2.37	21I	Delta	21I (Delta)
hCoV-19/Ghana/UHAS-AL045/2021|EPI_ISL_3980456|2021-07-22	21J	AY.88	B.1.617.2.88	21J	Delta	21J (Delta)
hCoV-19/Ghana/UHAS-AL046/2021|EPI_ISL_3980457|2021-07-22	21J	AY.88	B.1.617.2.88	21J	Delta	21J (Delta)
hCoV-19/Ghana/UHAS-AL050/2021|EPI_ISL_3980458|2021-07-22	21J	AY.88	B.1.617.2.88	21J	Delta	21J (Delta)
hCoV-19/Guinea/Conakry_22720/2021|EPI_ISL_3988396|2021-07-13	21J	B.1.617.2	B.1.617.2	21J	Delta	21J (Delta)
hCoV-19/Gabon/LPDG1142/2021|EPI_ISL_4000192|2021-07-22	21J	AY.4	B.1.617.2.4	21J	Delta	21J (Delta)
hCoV-19/South_Africa/KRISP-UFS-K022139/2021|EPI_ISL_4003573|2021-07-19	21J	AY.45	B.1.617.2.45	21J	Delta	21J (Delta)
hCoV-19/South_Africa/KRISP-UFS-K022141/2021|EPI_ISL_4003574|2021-07-19	21J	AY.45	B.1.617.2.45	21J	Delta	21J (Delta)
hCoV-19/South_Africa/KRISP-UFS-K022187/2021|EPI_ISL_4003575|2021-07-19	21J	B.1.617.2	B.1.617.2	21J	Delta	21J (Delta)
hCoV-19/South_Africa/KRISP-UFS-K022137/2021|EPI_ISL_4003585|2021-07-18	21J	AY.45	B.1.617.2.45	21J	Delta	21J (Delta)
hCoV-19/South_Africa/KRISP-UFS-K022138/2021|EPI_ISL_4003586|2021-07-12	21J	AY.45	B.1.617.2.45	21J	Delta	21J (Delta)
hCoV-19/South_Africa/KRISP-UFS-K022033/2021|EPI_ISL_4003590|2021-07-12	21J	AY.45	B.1.617.2.45	21J	Delta	21J (Delta)
hCoV-19/South_Africa/KRISP-UFS-K022051/2021|EPI_ISL_4003599|2021-07-19	21J	AY.45	B.1.617.2.45	21J	Delta	21J (Delta)
hCoV-19/South_Africa/KRISP-UFS-K022044/2021|EPI_ISL_4003596|2021-07-12	21J	AY.45	B.1.617.2.45	21J	Delta	21J (Delta)
hCoV-19/South_Africa/KRISP-UFS-K022047/2021|EPI_ISL_4003597|2021-07-16	21J	AY.45	B.1.617.2.45	21J	Delta	21J (Delta)
hCoV-19/South_Africa/KRISP-UFS-K022050/2021|EPI_ISL_4003598|2021-07-18	21J	AY.116	B.1.617.2.116	21J	Delta	21J (Delta)
[truncated: 1,138 more rows]
