# Supplementary figures and images for: COVID-19 Genomic Surveillance in Bangui (Central African Republic) Reveals a Landscape of Circulating Variants Linked to Validated Antiviral Targets of SARS-CoV-2 Proteome
Source: MDPI journal article supplement (doi:10.3390/v15122309), 2023-11-24

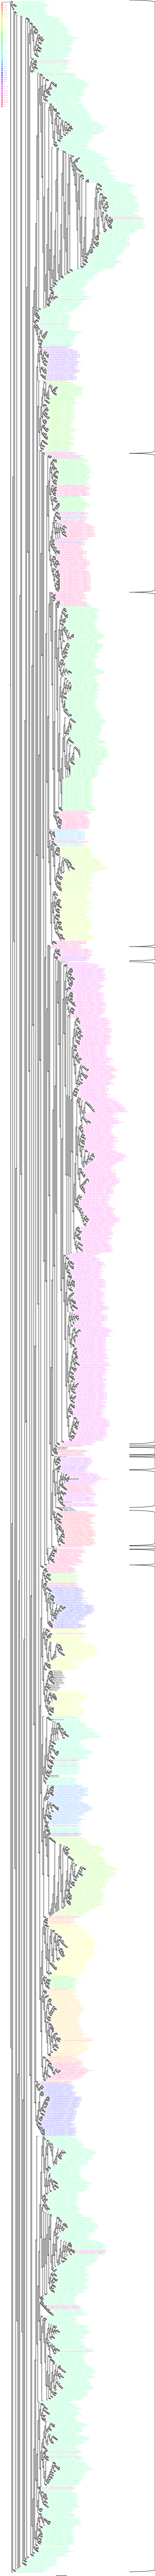

## Delta – 211

Delta = 21A

Mu - 21H  
19A and 19B  
20A  
20B  
  
Alpha - 20I

**Delt**

## Delta – 21J

Supplement: s1 [file s1]
